# Supplementary material for: Human Leukocyte Antigen-A, B, C, DRB1, and DQB1 Allele and Haplotype Frequencies in a Subset of 237 Donors in the South African Bone Marrow Registry
Source: J Immunol Res. 2018 Apr 23;2018:2031571. doi: 10.1155/2018/2031571 (PMC5937380; doi:10.1155/2018/2031571)
Supplement: Supplementary Materials — Supplementary Table 1 (Table S1): HLA-A, HLA-B, HLA-C, HLA-DRB1, and HLA-DQB1 allele frequencies in 237 volunteer bone marrow donors registered in the South African Bone Marrow Registry. The 237 individuals described herein are a subset of all SABMR registered donors. Supplementary Table 2 (Table S2): Two, three, four, and five loci Haplo-o-Mat [38] estimated haplotype frequencies in 237 volunteer bone marrow donors registered in the South African Bone Marrow Registry. The 237 individuals described herein are a subset of all SABMR registered donors. [file 2031571.f1.xlsx]

## Sheet: Table S1
Table S1: HLA -A, -B, -C, -DRB1 and –DQB1 allele frequencies in 237 volonteer bone marrow donors registred in the South African Bone Marrow Registry (ordered by frequency)
allele	frequency
C*07:02g	0.179688
DQB1*06:02	0.1573
DQB1*03:01	0.138889
DQB1*05:01	0.118056
C*07:01g	0.103693
A*02:01g	0.0956691
A*03:01g	0.0928045
C*04:01g	0.0909091
DQB1*02:01	0.0902778
DQB1*03:02	0.0833333
B*07:02g	0.081574
C*06:02g	0.0738636
DRB1*15:01	0.0716412
DQB1*06:03	0.0678105
DQB1*04:02	0.0659722
DRB1*15:03	0.065051
DQB1*02:02	0.0625
DRB1*07:01	0.0572279
C*08:02g	0.0568182
A*01:01g	0.0567167
DRB1*13:01	0.053386
DRB1*11:01	0.0532153
C*02:02g	0.0511364
A*24:02g	0.0506775
A*30:02g	0.0499322
B*08:01g	0.0493021
DQB1*05:03	0.0486111
A*68:02g	0.0476965
B*58:02	0.047619
DRB1*03:01	0.0464054
C*05:01g	0.0454545
C*15:02g	0.0454545
C*03:04g	0.0454545
DQB1*03:03	0.0451389
A*11:01g	0.0439024
A*30:01g	0.0433659
DQB1*06:01	0.0416667
C*12:03g	0.0397727
B*42:01	0.0394089
DRB1*04:01	0.0375
A*29:02g	0.0352659
DRB1*03:02	0.0344388
A*23:01g	0.0343346
C*03:03g	0.0340909
C*01:02g	0.0340909
DRB1*13:02	0.0330912
B*44:03	0.0327
B*15:10	0.0316092
B*15:01g	0.0310345
B*15:03g	0.0309673
B*35:01g	0.0308498
DRB1*01:02	0.0291241
DRB1*01:01	0.0290938
C*17:01g	0.0284091
C*12:02g	0.0284091
B*14:02	0.0283251
B*58:01g	0.0275918
B*18:01g	0.0258919
DRB1*15:02	0.0255102
A*68:01g	0.0252033
B*51:01g	0.0250423
A*43:01	0.0243902
A*66:01g	0.0231707
A*33:03g	0.0229675
C*16:01g	0.0227273
C*14:02g	0.0227273
A*34:02	0.0219512
DQB1*03:19	0.0208333
DQB1*06:04	0.0208333
DQB1*06:09	0.0208333
DRB1*11:02	0.0207726
B*15:16	0.0205255
B*13:02g	0.0205217
DRB1*13:03	0.0204932
A*74:01g	0.0195587
A*31:01g	0.0195122
B*58:60	0.0192939
B*53:01g	0.0184729
B*45:01g	0.0181034
B*81:01g	0.0180624
DRB1*11:04	0.0178571
B*27:05g	0.0172414
A*24:07	0.0170732
C*08:04	0.0170455
C*03:02g	0.0170455
C*18:01g	0.0170455
C*07:04g	0.0170455
A*02:05g	0.0158537
DRB1*12:01	0.0158163
DRB1*12:02	0.0153061
A*33:01g	0.0150407
B*44:02g	0.0147783
B*40:06	0.0147783
B*42:02	0.0147783
A*02:11g	0.0146341
A*26:01g	0.0140921
DRB1*08:04	0.0140306
B*07:05g	0.0139573
B*57:03	0.0135468
DRB1*03:102	0.0131803
DRB1*14:04	0.0127551
B*50:01g	0.0123153
B*52:01g	0.0123153
B*57:01g	0.0123153
B*35:03g	0.0123153
A*32:01g	0.0122855
A*68:125	0.0121951
DRB1*09:01	0.0121173
DRB1*04:05	0.0114796
C*15:05g	0.0113636
DRB1*13:128	0.0111099
B*14:01	0.0110837
DRB1*04:04	0.0108418
B*35:08	0.0100062
A*30:04g	0.0097561
A*02:02	0.0097561
A*69:01	0.0097561
DRB1*03:115	0.00935374
DRB1*10:01	0.00892857
DRB1*13:117	0.00807503
B*41:01	0.00788177
B*49:01g	0.00788177
B*35:05	0.0075431
B*15:17	0.00738916
B*38:01	0.00738916
B*47:01	0.00738916
DRB1*13:105	0.00710321
B*44:198N	0.00683791
B*44:193	0.00683791
DRB1*11:100	0.00678673
DRB1*11:97	0.00678673
DRB1*13:112	0.00646546
DRB1*09:21	0.00637755
B*44:199	0.00615764
DRB1*11:117	0.00614897
B*44:207	0.00601689
C*08:01g	0.00568182
C*07:26	0.00568182
DRB1*12:10	0.00561224
DRB1*12:06	0.00561224
DRB1*12:17	0.00561224
DRB1*14:54	0.00542092
DRB1*14:01	0.00542092
DRB1*13:166	0.00541895
DRB1*07:34	0.00535714
DRB1*08:01	0.00510204
DRB1*04:03	0.00510204
DRB1*11:17	0.00510204
B*56:01g	0.00492611
B*53:32	0.00492611
B*57:70	0.00492611
B*40:01g	0.00492611
B*40:02g	0.00492611
A*24:03g	0.00487805
A*74:18	0.00487805
A*80:01	0.00487805
A*24:17	0.00487805
A*66:02	0.00487805
A*25:01g	0.00487805
DRB1*13:190	0.00482169
B*39:10	0.00472085
A*30:83	0.00471545
A*30:87	0.00471545
DRB1*13:186	0.00441676
DRB1*13:173	0.00441676
DRB1*11:155	0.00431612
DRB1*11:157	0.00431612
DRB1*11:158	0.00431612
B*15:02g	0.00431034
A*29:44	0.0042982
DRB1*07:33	0.00408163
DRB1*07:31	0.00408163
DRB1*11:169N	0.00403267
DRB1*13:121	0.00393054
B*53:27	0.00369458
DQB1*04:04	0.00347222
DQB1*03:30	0.00347222
DQB1*06:40	0.00347222
DQB1*06:11	0.00347222
A*29:65	0.00340108
A*29:72	0.00340108
A*29:64	0.00340108
B*08:72N	0.00329776
B*08:121	0.00329776
B*08:127	0.00329776
B*58:06	0.00328407
DRB1*09:09	0.00318878
DRB1*03:83	0.00303803
DRB1*03:68N	0.00303803
DRB1*13:185N	0.00302079
DRB1*11:95	0.00300711
A*29:01	0.00287824
C*07:15	0.00284091
DRB1*11:154	0.00275716
DRB1*11:166	0.00275716
DRB1*13:183	0.00259047
DRB1*14:05	0.00255102
DRB1*04:02	0.00255102
DRB1*04:08	0.00255102
DRB1*04:07	0.00255102
DRB1*04:10	0.00255102
DRB1*08:03	0.00255102
B*37:01g	0.00246305
B*18:02	0.00246305
B*51:02	0.00246305
B*15:32	0.00246305
B*35:02g	0.00246305
B*81:07	0.00246305
B*82:02	0.00246305
B*82:01	0.00246305
B*57:02	0.00246305
B*15:18g	0.00246305
B*40:03g	0.00246305
B*38:02g	0.00246305
B*15:312	0.00246305
B*46:01g	0.00246305
B*15:24	0.00246305
B*27:04g	0.00246305
B*44:29	0.00246305
B*39:01g	0.00246305
A*36:01	0.00243902
A*02:492	0.00243902
A*34:10N	0.00243902
A*30:25	0.00243902
A*34:09	0.00243902
A*02:06g	0.00243902
DRB1*03:50	0.00240028
B*44:222	0.00232231
B*39:89	0.0022578
B*39:99	0.0022578
A*68:119	0.00203252
DRB1*13:109	0.00198413
DRB1*01:43	0.00191327
A*29:32	0.00191057
A*66:12	0.00182927
B*15:61	0.0018249
DRB1*04:151	0.00178571
DRB1*04:175	0.00178571
DRB1*04:171	0.00178571
DRB1*13:115	0.00178571
DRB1*03:104	0.00176252
DRB1*03:100	0.00176252
DRB1*03:112	0.00176252
B*49:30	0.00172414
A*23:67	0.00165505
A*29:34	0.00162602
A*02:546	0.00162602
A*02:532	0.00162602
A*29:09	0.00162602
A*74:13	0.00162602
A*02:484	0.00162602
B*15:123g	0.00160099
DRB1*07:35	0.00153061
DRB1*01:57	0.0014881
DRB1*01:46	0.0014881
DRB1*13:33	0.00136054
DRB1*13:95	0.00136054
B*08:131	0.00134784
DRB1*15:94	0.00127551
DRB1*04:178N	0.00127551
DRB1*03:107	0.00127551
DRB1*08:59	0.00127551
DRB1*10:06	0.00127551
B*18:73	0.00124148
B*57:07	0.00123153
B*15:90	0.00123153
B*58:25	0.00123153
B*44:37	0.00123153
B*49:11	0.00123153
B*44:174	0.00123153
B*44:183	0.00123153
B*44:175	0.00123153
B*14:39	0.00123153
B*14:40	0.00123153
A*68:03	0.00121951
A*66:05	0.00121951
A*68:31	0.00121951
A*30:61	0.00121951
A*02:229	0.00121951
A*33:10	0.00121951
A*03:22	0.00121951
DRB1*13:23	0.00120342
DRB1*03:117	0.00112477
DRB1*03:116	0.00112477
DRB1*03:114	0.00112477
DRB1*13:148	0.00108295
DRB1*13:153	0.00108295
A*03:184	0.00106502
A*03:197N	0.00106502
B*08:136	0.00103996
A*29:66	0.00102981
B*58:49	0.00102441
B*18:103	0.00101756
B*18:62	0.00101756
B*18:99	0.00101756
B*18:100	0.00101756
B*07:104	0.000983816
A*30:78N	0.00097561
A*30:73N	0.00097561
A*30:62	0.00097561
DRB1*13:120	0.000935374
A*03:195	0.000929514
DRB1*13:99	0.000905797
DRB1*13:96	0.000905797
A*23:03	0.000897112
A*29:45	0.000897112
A*29:40	0.000897112
A*29:43	0.000897112
DRB1*11:14	0.000874636
DRB1*11:20	0.000874636
DRB1*13:151	0.00085034
DRB1*01:35	0.00085034
DRB1*01:34	0.00085034
DRB1*03:53	0.00085034
DRB1*07:26N	0.00085034
DRB1*07:25	0.00085034
DRB1*01:67	0.00085034
DRB1*01:50	0.00085034
DRB1*03:74	0.00085034
DRB1*13:39	0.00085034
A*74:09	0.000836237
A*74:11	0.000836237
A*74:15	0.000836237
B*15:338	0.000821018
B*07:202	0.000821018
B*15:313	0.000821018
B*15:67	0.000821018
B*15:95	0.000821018
B*48:06	0.000821018
B*35:76	0.000821018
B*07:213	0.000821018
A*29:53	0.000813008
A*30:82	0.000813008
A*68:122	0.000813008
A*23:04	0.000813008
B*08:142	0.000800493
B*08:149	0.000800493
B*18:104	0.000771259
DRB1*11:27	0.000748669
B*07:221	0.000736893
B*07:217	0.000736893
B*07:224	0.000736893
B*07:212	0.000736893
B*58:63	0.000716525
C*07:22	0.000710227
C*07:28	0.000710227
C*07:45	0.000710227
C*07:46	0.000710227
C*07:47	0.000710227
DRB1*13:145	0.000693212
DRB1*13:142N	0.000693212
A*03:188	0.000685
A*03:209	0.000679193
DRB1*03:108	0.000637755
DRB1*03:15	0.000637755
DRB1*09:19	0.000637755
DRB1*09:18	0.000637755
DRB1*04:23	0.000637755
DRB1*04:182	0.000637755
DRB1*04:157N	0.000637755
DRB1*11:162	0.000637755
B*15:341	0.000615764
B*13:82	0.000615764
B*39:16	0.000615764
B*45:04	0.000615764
B*07:80	0.000615764
A*66:07	0.000609756
A*23:68	0.000609756
A*30:70N	0.000609756
A*30:66	0.000609756
A*23:56	0.000609756
A*23:54	0.000609756
B*07:231N	0.000600057
B*07:241	0.000600057
B*07:233	0.000600057
B*07:240	0.000600057
B*07:230	0.000600057
A*30:45	0.000575881
A*30:34	0.000575881
A*30:32	0.000575881
A*30:51	0.000575881
A*30:50	0.000575881
A*30:12	0.000575881
DRB1*11:140	0.00057398
DRB1*11:141	0.00057398
DRB1*11:133	0.00057398
DRB1*11:134	0.00057398
A*29:22	0.000542005
DRB1*13:28	0.000510996
DRB1*04:63	0.000510204
DRB1*13:14	0.000510204
DRB1*13:05	0.000510204
DRB1*11:19	0.000510204
DRB1*11:09	0.000510204
DRB1*13:63	0.000510204
DRB1*12:36	0.000510204
DRB1*11:178	0.000496032
B*15:54	0.000492611
B*45:09	0.000492611
B*41:32	0.000492611
B*49:35	0.000492611
B*49:33	0.000492611
B*49:10	0.000492611
B*45:03	0.000492611
B*41:29	0.000492611
B*41:35	0.000492611
B*41:34	0.000492611
B*15:282	0.000492611
B*13:70	0.000492611
B*13:65	0.000492611
B*13:68	0.000492611
DRB1*13:97	0.000480627
B*18:89	0.000470219
A*03:200Q	0.000440487
A*02:491	0.000429669
A*02:533	0.000429669
A*02:525N	0.000429669
A*02:483	0.000429669
A*02:501N	0.000429669
A*02:482	0.000429669
A*02:530	0.000429669
DRB1*13:200N	0.000428143
DRB1*13:201	0.000428143
DRB1*13:38	0.00042517
DRB1*13:66	0.00042517
DRB1*13:37	0.00042517
DRB1*13:170	0.00042517
DRB1*13:36	0.00042517
DRB1*13:139	0.00042517
A*29:74	0.000406504
A*29:69	0.000406504
A*33:69	0.000406504
A*33:71	0.000406504
A*33:68	0.000406504
A*33:67	0.000406504
A*33:64	0.000406504
A*33:32	0.000406504
A*33:60	0.000406504
A*33:56	0.000406504
A*33:70	0.000406504
A*33:57	0.000406504
B*07:234	0.000385878
A*02:34	0.000379802
DRB1*13:138	0.000374335
A*02:552	0.00036713
A*02:542	0.00036713
A*02:539	0.00036713
A*02:334	0.00036537
DRB1*11:124	0.000364431
DRB1*11:127	0.000364431
DRB1*11:16	0.000364431
DRB1*11:70	0.000364431
A*02:174	0.000362864
A*02:190	0.000362864
B*44:163	0.000351865
B*44:203	0.000351865
A*74:12N	0.000348432
A*74:08	0.000348432
A*02:35	0.000348432
DRB1*14:125	0.000318878
DRB1*14:114	0.000318878
DRB1*14:157	0.000318878
DRB1*14:151	0.000318878
DRB1*14:142	0.000318878
DRB1*14:113	0.000318878
A*02:502	0.000317397
A*02:468	0.000317354
B*08:104	0.000307882
A*33:93	0.000304878
A*33:95	0.000304878
DRB1*13:143	0.000283447
DRB1*13:147	0.000283447
B*51:158	0.00027452
B*08:140	0.000273673
B*08:138	0.000273673
A*29:73	0.000271003
A*26:104	0.000271003
A*26:109	0.000271003
A*29:78N	0.000271003
A*30:03	0.000271003
DRB1*13:103	0.000268042
DRB1*13:123	0.000268042
DRB1*13:73	0.000268042
DRB1*13:124	0.000268042
DRB1*13:34	0.000268042
DRB1*13:126	0.000268042
DRB1*11:144	0.000255102
B*07:191	0.000246923
B*07:185	0.000246923
B*07:189	0.000246923
B*07:190	0.000246923
B*07:22	0.000246923
A*03:190	0.000246366
B*18:14	0.000246305
A*03:203	0.000232288
DRB1*11:175	0.000231911
DRB1*03:121	0.000231911
B*58:72N	0.000223914
B*15:173	0.000223914
B*18:93	0.000223914
B*15:158	0.000223914
B*15:156	0.000223914
B*15:210	0.000223914
B*18:88	0.000223914
B*18:90	0.000223914
B*18:94N	0.000223914
B*15:74	0.000223914
B*18:87	0.000223914
B*18:92	0.000223914
B*15:132	0.000223914
B*18:11	0.000223914
B*18:36	0.000223914
B*15:127	0.000223914
B*13:30	0.000223914
B*13:08	0.000223914
B*13:27	0.000223914
B*13:37	0.000223914
B*13:42	0.000223914
B*13:44	0.000223914
B*13:45	0.000223914
B*13:47	0.000223914
B*13:49N	0.000223914
A*29:08N	0.000219606
A*29:06	0.000219606
A*29:10	0.000219606
A*29:16	0.000219606
A*29:17	0.000219606
A*29:04	0.000219606
A*29:27	0.000219606
A*29:23	0.000219606
A*29:25	0.000219606
A*29:24	0.000219606
A*29:12	0.000219606
A*29:21	0.000219606
A*29:29	0.000219606
A*30:43	0.000219512
A*30:14L	0.000219512
A*30:40	0.000219512
A*30:56	0.000219512
A*30:41	0.000219512
A*30:18	0.000219512
A*30:48	0.000219512
A*30:53	0.000219512
A*30:19	0.000219512
A*30:49	0.000219512
A*30:23	0.000219512
A*30:37	0.000219512
A*30:15	0.000219512
A*30:38	0.000219512
A*30:58	0.000219512
A*30:42	0.000219512
A*30:35	0.000219512
A*30:36	0.000219512
DRB1*15:114	0.000212585
DRB1*15:74	0.000212585
DRB1*15:85	0.000212585
DRB1*15:86	0.000212585
DRB1*15:106	0.000212585
DRB1*15:107	0.000212585
DRB1*15:113N	0.000212585
DRB1*15:112	0.000212585
DRB1*15:111	0.000212585
DRB1*15:110	0.000212585
DRB1*15:108	0.000212585
A*03:228	0.000207671
A*03:222	0.000207671
DQB1*06:218	0.000204248
DQB1*06:185	0.000204248
DQB1*06:110	0.000204248
DQB1*06:221	0.000204248
DQB1*06:44	0.000204248
DQB1*06:223	0.000204248
DQB1*06:187	0.000204248
DQB1*06:41	0.000204248
A*29:52	0.000203252
A*29:54	0.000203252
A*29:35	0.000203252
DRB1*13:184	0.000196232
DRB1*13:178	0.000196232
DRB1*01:32	0.000182216
DRB1*01:30	0.000182216
DRB1*01:27	0.000182216
DRB1*01:25	0.000182216
DRB1*01:24	0.000182216
DRB1*01:21	0.000182216
DRB1*01:19	0.000182216
DRB1*01:13	0.000182216
DRB1*01:11	0.000182216
DRB1*01:08	0.000182216
DRB1*01:07	0.000182216
DRB1*01:05	0.000182216
DRB1*01:28	0.000182216
A*01:152	0.000175109
A*01:150	0.000175109
A*01:151	0.000175109
A*01:154	0.000175109
A*01:156	0.000175109
A*01:153	0.000175109
A*01:158	0.000175109
A*01:160N	0.000175109
A*01:161	0.000175109
B*35:119	0.000164204
B*35:263	0.000164204
B*35:272	0.000164204
B*35:252	0.000164204
DQB1*06:226	0.000161499
DQB1*06:47	0.000161499
DQB1*06:228	0.000161499
DQB1*06:227	0.000161499
DQB1*06:111	0.000161499
DQB1*06:224	0.000161499
DQB1*06:188	0.000161499
DQB1*06:200	0.000161499
DQB1*06:219	0.000161499
DQB1*06:225	0.000161499
DQB1*06:127	0.000161499
DQB1*06:84	0.000161499
DQB1*06:117	0.000161499
DQB1*06:109	0.000161499
DQB1*06:116	0.000161499
A*02:528	0.000158177
A*02:551	0.000158177
B*35:269	0.000153941
B*35:15	0.000153941
B*35:64	0.000153941
B*35:199	0.000153941
B*35:197	0.000153941
B*35:34	0.000153941
B*35:124	0.000153941
B*35:49	0.000153941
B*35:78	0.000153941
B*35:51	0.000153941
B*35:54	0.000153941
B*35:29	0.000153941
DRB1*13:110	0.000146565
DRB1*13:131	0.000146565
DRB1*13:61	0.000146565
DRB1*13:87	0.000146565
DRB1*13:113N	0.000146565
DRB1*13:130	0.000146565
DRB1*13:114	0.000146565
DRB1*13:102	0.000146565
DRB1*13:22	0.000146565
DRB1*13:51	0.000146565
DRB1*13:80	0.000146565
DRB1*13:69	0.000146565
DRB1*13:35	0.000146565
DRB1*13:64	0.000146565
DRB1*13:92	0.000146565
DRB1*13:59	0.000146565
DRB1*13:106	0.000146565
DRB1*13:91	0.000146565
DRB1*13:68	0.000146565
DRB1*13:125	0.000146565
A*02:07g	0.000145638
B*07:91	0.000144886
B*07:68	0.000144886
B*07:56	0.000144886
B*07:26	0.000144886
B*07:24	0.000144886
B*07:204	0.000144886
B*07:18	0.000144886
B*07:162	0.000144886
B*07:86	0.000144886
B*07:134	0.000144886
B*07:125	0.000144886
B*07:12	0.000144886
B*07:114	0.000144886
B*07:09	0.000144886
B*51:162	0.000144886
B*51:161	0.000144886
B*51:159	0.000144886
B*51:156	0.000144886
B*51:155	0.000144886
B*51:163	0.000144886
A*68:53	0.000135501
A*68:60	0.000135501
A*68:62	0.000135501
A*68:64	0.000135501
A*68:67	0.000135501
A*68:77	0.000135501
A*68:49N	0.000135501
A*68:74	0.000135501
A*68:48	0.000135501
A*68:44	0.000135501
A*68:40	0.000135501
A*68:18N	0.000135501
A*68:78	0.000135501
A*68:82	0.000135501
A*68:80	0.000135501
A*68:81	0.000135501
A*68:34	0.000135501
B*51:184N	0.000129634
B*51:167	0.000129634
B*51:168	0.000129634
B*51:171	0.000129634
B*51:173Q	0.000129634
B*51:174	0.000129634
B*51:183	0.000129634
B*15:25g	0.000123153
B*15:28	0.000123153
B*15:39	0.000123153
B*15:70	0.000123153
B*15:154	0.000123153
B*15:309	0.000123153
B*15:317	0.000123153
B*15:318	0.000123153
DRB1*13:233	0.000121477
DRB1*13:215	0.000121477
B*07:182N	0.000117288
B*07:192	0.000117288
A*03:63	0.000116144
DRB1*11:81	0.000110914
DRB1*11:112	0.000110914
DRB1*11:24	0.000110914
DRB1*11:114	0.000110914
DRB1*11:15	0.000110914
DRB1*11:12	0.000110914
DRB1*11:108	0.000110914
DRB1*11:28	0.000110914
DRB1*11:106	0.000110914
DRB1*11:29	0.000110914
DRB1*11:101	0.000110914
DRB1*11:39	0.000110914
DRB1*11:49	0.000110914
DRB1*11:99	0.000110914
DRB1*11:61	0.000110914
DRB1*11:62	0.000110914
DRB1*11:90	0.000110914
DRB1*11:66	0.000110914
A*03:201	0.000101626
B*07:232	9.85222e-05
A*30:59N	9.7561e-05
A*30:63	9.7561e-05
A*30:31	9.7561e-05
A*30:60	9.7561e-05
A*30:39	9.7561e-05
A*02:565	9.66803e-05
A*02:561	9.66803e-05
A*02:564	9.66803e-05
A*02:573	9.66803e-05
A*02:569	9.66803e-05
DRB1*13:127	9.11079e-05
DRB1*13:79	9.11079e-05
A*32:18	9.03342e-05
A*32:05	9.03342e-05
A*32:07	9.03342e-05
A*32:08	9.03342e-05
A*32:26	9.03342e-05
A*32:37	9.03342e-05
A*32:36	9.03342e-05
A*32:35	9.03342e-05
A*32:34	9.03342e-05
A*32:32	9.03342e-05
A*32:31	9.03342e-05
A*32:30	9.03342e-05
A*32:29	9.03342e-05
A*32:28	9.03342e-05
A*32:27N	9.03342e-05
A*32:09	9.03342e-05
A*32:25	9.03342e-05
A*32:24	9.03342e-05
A*32:23	9.03342e-05
A*32:21	9.03342e-05
A*32:20	9.03342e-05
A*32:19N	9.03342e-05
A*32:16	9.03342e-05
A*32:14	9.03342e-05
A*32:12	9.03342e-05
A*32:11Q	9.03342e-05
A*23:42	8.41043e-05
A*23:05	8.41043e-05
A*23:06	8.41043e-05
A*23:15	8.41043e-05
A*23:16	8.41043e-05
A*23:50	8.41043e-05
A*23:49	8.41043e-05
A*23:48	8.41043e-05
A*23:19N	8.41043e-05
A*23:47	8.41043e-05
A*23:44	8.41043e-05
A*23:21	8.41043e-05
A*23:11N	8.41043e-05
A*23:41	8.41043e-05
A*23:39	8.41043e-05
A*23:23	8.41043e-05
A*23:25	8.41043e-05
A*23:35	8.41043e-05
A*23:34	8.41043e-05
A*23:33	8.41043e-05
A*23:32	8.41043e-05
A*23:29	8.41043e-05
A*23:26	8.41043e-05
A*29:41	8.41043e-05
A*29:15	8.41043e-05
A*29:11	8.41043e-05
A*29:38	8.41043e-05
A*29:36	8.41043e-05
A*29:50	8.41043e-05
A*29:42	8.41043e-05
B*07:254	8.21018e-05
B*07:253	8.21018e-05
B*07:245	8.21018e-05
B*07:244	8.21018e-05
B*07:07	8.21018e-05
B*07:256	8.21018e-05
A*01:166	8.13008e-05
A*01:164	8.13008e-05
A*01:165	8.13008e-05
A*24:283	6.77507e-05
A*24:272	6.77507e-05
A*24:287	6.77507e-05
A*24:279	6.77507e-05
A*24:280	6.77507e-05
A*24:276	6.77507e-05
A*24:292	6.77507e-05
A*24:275	6.77507e-05
A*02:289	6.42081e-05
DRB1*13:141	5.5457e-05
DRB1*13:155	5.5457e-05
DRB1*13:137N	5.5457e-05
A*02:516N	5.42005e-05
A*02:540N	5.42005e-05
A*02:548	5.42005e-05
A*02:510	4.9776e-05
A*02:488	4.9776e-05
A*02:520	4.9776e-05
A*02:537	4.9776e-05
A*02:225N	4.8546e-05
A*02:299	4.8546e-05
A*02:284N	4.8546e-05
A*02:272	4.8546e-05
A*02:326	4.8546e-05
A*02:94N	4.8546e-05
A*02:121	4.8546e-05
A*02:257	4.8546e-05
A*02:233	4.8546e-05
A*02:206	4.8546e-05
A*02:218	4.8546e-05
A*02:228	4.8546e-05
A*02:275	4.8546e-05
A*02:288	4.8546e-05
A*02:332	4.8546e-05
A*02:274	4.8546e-05
A*02:302	4.8546e-05
A*02:31	4.8546e-05
A*02:53N	4.8546e-05
A*02:59	4.8546e-05
A*02:82N	4.8546e-05
A*02:96	4.8546e-05
A*02:322	4.8546e-05
A*02:33	4.8546e-05
A*02:325	4.8546e-05
A*02:42	4.8546e-05
A*02:95	4.8546e-05
A*02:321N	4.8546e-05
A*02:227N	4.8546e-05
A*02:313	4.8546e-05
A*02:312	4.8546e-05
A*02:231	4.8546e-05
A*02:221	4.8546e-05
A*02:222N	4.8546e-05
A*02:167	4.8546e-05
A*02:24	4.8546e-05
A*02:235	4.8546e-05
A*02:219	4.8546e-05
A*02:220	4.8546e-05
A*02:29	4.8546e-05
A*02:30	4.8546e-05
A*02:216	4.8546e-05
A*02:208	4.8546e-05
A*02:150	4.8546e-05
A*02:207	4.8546e-05
A*02:203	4.8546e-05
A*02:200	4.8546e-05
A*02:317	4.8546e-05
A*02:74	4.8546e-05
A*02:161	4.8546e-05
A*02:176	4.8546e-05
A*02:197	4.8546e-05
A*02:164	4.8546e-05
A*02:211	4.8546e-05
A*02:215	4.8546e-05
A*02:173	4.8546e-05
A*02:159	4.8546e-05
A*02:175	4.8546e-05
A*02:236	4.8546e-05
A*02:93	4.8546e-05
A*02:335	4.8546e-05
A*02:318	4.8546e-05
A*02:141	4.8546e-05
A*02:296	4.8546e-05
A*02:287	4.8546e-05
A*02:285	4.8546e-05
A*02:123	4.8546e-05
A*02:269	4.8546e-05
A*02:111	4.8546e-05
A*02:251	4.8546e-05
A*02:201	4.8546e-05
A*02:138	4.8546e-05
A*02:133	4.8546e-05
A*02:293Q	4.8546e-05
A*02:238	4.8546e-05
A*02:119	4.8546e-05
A*02:336	4.8546e-05
A*02:18	4.8546e-05
A*02:166	4.8546e-05
A*02:165	4.8546e-05
A*02:20	4.8546e-05
A*02:307	4.8546e-05
A*02:202	4.8546e-05
A*02:109	4.8546e-05
A*02:204	4.8546e-05
A*02:205	4.8546e-05
A*02:181	4.8546e-05
A*02:196	4.8546e-05
A*02:250N	4.8546e-05
A*02:242	4.8546e-05
A*02:67	4.8546e-05
A*02:153	4.8546e-05
A*02:306	4.8546e-05
A*02:282	4.8546e-05
A*02:283	4.8546e-05
A*02:273	4.8546e-05
A*02:240	4.8546e-05
A*02:139	4.8546e-05
A*02:107	4.8546e-05
A*02:292	4.8546e-05
A*02:101	4.8546e-05
A*02:189	4.8546e-05
A*02:192	4.8546e-05
A*02:177	4.8546e-05
A*02:168	4.8546e-05
A*02:199	4.8546e-05
A*02:162	4.8546e-05
A*02:214	4.8546e-05
A*02:77	4.8546e-05
A*02:160	4.8546e-05
A*02:187	4.8546e-05
A*02:574	4.69043e-05
A*02:549	4.69043e-05
A*02:556	4.69043e-05
A*02:68	3.41139e-05
A*02:49g	3.41139e-05
A*02:226N	3.41139e-05
A*02:262	3.41139e-05
A*02:182	3.41139e-05
A*02:62	3.13698e-05
A*02:185	1.71762e-05
A*02:151	1.44321e-05
A*02:71	1.44321e-05
A*02:105	1.44321e-05
A*02:85	1.44321e-05
A*02:86	1.44321e-05
A*02:88N	1.44321e-05
A*02:234	1.44321e-05
A*02:64	1.44321e-05
A*02:163	1.44321e-05
A*02:198	1.44321e-05
A*02:114	1.44321e-05
A*02:60	1.44321e-05
A*02:118	1.44321e-05
A*02:145	1.44321e-05
A*02:254	1.44321e-05
A*02:263	1.44321e-05
A*02:25	1.44321e-05
A*02:279	1.44321e-05
A*02:32N	1.44321e-05
A*02:246	1.44321e-05
A*02:149	1.44321e-05
A*02:147	1.44321e-05
A*02:223N	1.44321e-05
A*02:301N	1.44321e-05
A*02:311	1.44321e-05
A*02:193	1.44321e-05
A*02:188	1.44321e-05
A*02:314N	1.44321e-05

## Sheet: Table S2
Two, three, four and five loci Haplo-o-Mat [38] estimated haplotype frequencies in 237 volonteer bone marrow donors registred in the South African Bone Marrow Registry (ordered by frequency)
haplotype	frequency		haplotype	frequency		haplotype	frequency		haplotype	frequency
B*07:02g~C*07:02g	0.145349		C*07:02g~DQB1*06:02~DRB1*15:01	0.106557		B*07:02g~C*07:02g~DQB1*06:02~DRB1*15:01	0.108333		A*03:01g~B*07:02g~C*07:02g~DQB1*06:02~DRB1*15:01	0.0666667
DQB1*06:02~DRB1*15:01	0.125		B*07:02g~DQB1*06:02~DRB1*15:01	0.106061		B*08:01g~C*07:01g~DQB1*02:01~DRB1*03:01	0.0666667		A*01:01g~B*08:01g~C*07:01g~DQB1*02:01~DRB1*03:01	0.05
C*07:02g~DQB1*06:02	0.105016		B*07:02g~C*07:02g~DQB1*06:02	0.100565		A*03:01g~B*07:02g~C*07:02g~DQB1*06:02	0.0625		A*01:01g~B*57:01g~C*06:02g~DQB1*03:03~DRB1*07:01	0.0208333
B*07:02g~DQB1*06:02	0.0991597		B*07:02g~C*07:02g~DRB1*15:01	0.0844156		A*03:01g~B*07:02g~DQB1*06:02~DRB1*15:01	0.0606061		A*03:01g~B*07:02g~C*07:02g~DQB1*05:01~DRB1*01:01	0.0166667
DQB1*02:01~DRB1*03:01	0.0955883		A*03:01g~B*07:02g~C*07:02g	0.0813954		A*03:01g~C*07:02g~DQB1*06:02~DRB1*15:01	0.0573799		A*11:01g~B*15:01g~C*03:03g~DQB1*06:03~DRB1*13:01	0.0166667
C*07:02g~DRB1*15:01	0.0905173		B*08:01g~DQB1*02:01~DRB1*03:01	0.0757576		A*03:01g~B*07:02g~C*07:02g~DRB1*15:01	0.0507979		A*24:02g~B*07:02g~C*07:02g~DQB1*06:02~DRB1*15:01	0.0166667
A*03:01g~C*07:02g	0.0790788		C*07:01g~DQB1*02:01~DRB1*03:01	0.0655738		A*01:01g~C*07:01g~DQB1*02:01~DRB1*03:01	0.0491803		A*02:11g~B*40:06~C*15:02g~DQB1*06:01~DRB1*15:01	0.0166667
B*08:01g~DQB1*02:01	0.0714286		B*08:01g~C*07:01g~DQB1*02:01	0.0625		A*01:01g~B*08:01g~C*07:01g~DQB1*02:01	0.046875		A*33:01g~B*14:02~C*08:02g~DQB1*06:03~DRB1*13:01	0.0166667
DQB1*06:03~DRB1*13:01	0.0707283		A*03:01g~C*07:02g~DQB1*06:02	0.0615385		A*01:01g~B*08:01g~DQB1*02:01~DRB1*03:01	0.0454545		A*68:02g~B*14:01~C*08:02g~DQB1*02:02~DRB1*07:01	0.0166667
A*03:01g~DQB1*06:02	0.0612708		A*03:01g~B*07:02g~DQB1*06:02	0.0571429		A*01:01g~B*08:01g~C*07:01g~DRB1*03:01	0.0370591		A*11:01g~B*51:01g~C*01:02g~DQB1*03:02~DRB1*04:01	0.0166667
B*08:01g~C*07:01g	0.0581395		B*08:01g~C*07:01g~DRB1*03:01	0.0519481		B*15:01g~C*03:03g~DQB1*06:03~DRB1*13:01	0.0291667		A*31:01g~B*27:05g~C*02:02g~DQB1*06:02~DRB1*15:01	0.0166667
C*07:01g~DQB1*02:01	0.0534561		A*03:01g~DQB1*06:02~DRB1*15:01	0.0514769		B*44:02g~C*05:01g~DQB1*05:01~DRB1*01:01	0.025		A*03:01g~B*07:02g~C*07:02g~DQB1*03:01~DRB1*11:01	0.0166667
DQB1*05:01~DRB1*01:01	0.0514706		A*01:01g~B*08:01g~C*07:01g	0.0465117		A*11:01g~C*01:02g~DQB1*06:02~DRB1*15:01	0.0245873		A*68:02g~B*14:02~C*08:02g~DQB1*03:01~DRB1*13:03	0.0166667
DQB1*03:01~DRB1*11:01	0.0514706		A*01:01g~C*07:01g~DQB1*02:01	0.0461538		A*03:01g~C*07:02g~DQB1*05:01~DRB1*01:01	0.0245873		A*69:01~B*15:17~C*07:01g~DQB1*03:01~DRB1*11:01	0.0166667
C*07:01g~DRB1*03:01	0.049043		A*03:01g~C*07:02g~DRB1*15:01	0.0443044		A*03:01g~B*07:02g~C*07:02g~DQB1*03:01	0.0234375		A*02:01g~B*07:02g~C*07:02g~DQB1*06:02~DRB1*15:01	0.0166667
C*04:01g~DQB1*05:01	0.0450149		A*01:01g~B*08:01g~DQB1*02:01	0.0428571		A*11:01g~B*51:01g~DQB1*06:02~DRB1*15:01	0.0227273		A*30:01g~B*42:01~C*17:01g~DQB1*04:02~DRB1*03:02	0.0125
DQB1*02:02~DRB1*07:01	0.0441177		A*01:01g~DQB1*02:01~DRB1*03:01	0.041964		A*02:01g~B*07:02g~DQB1*06:02~DRB1*15:01	0.0227273		A*24:02g~B*15:32~C*12:03g~DQB1*03:01~DRB1*12:02	0.00833333
B*07:02g~DRB1*15:01	0.0428396		A*01:01g~C*07:01g~DRB1*03:01	0.0370529		B*42:01~C*17:01g~DQB1*04:02~DRB1*03:02	0.0208334		A*23:01g~B*49:01g~C*07:01g~DQB1*05:03~DRB1*15:02	0.00833333
A*01:01g~DQB1*02:01	0.0416667		A*11:01g~DQB1*06:03~DRB1*13:01	0.0367647		B*57:01g~C*06:02g~DQB1*03:03~DRB1*07:01	0.0208334		A*25:01g~B*08:01g~C*07:01g~DQB1*02:01~DRB1*03:01	0.00833333
B*14:02~C*08:02g	0.0406977		A*24:02g~B*07:02g~C*07:02g	0.0348837		A*01:01g~C*06:02g~DQB1*03:03~DRB1*07:01	0.0204918		A*26:01g~B*58:01g~C*05:01g~DQB1*06:02~DRB1*15:03	0.00833333
A*03:01g~B*07:02g	0.0405923		B*15:01g~DQB1*06:03~DRB1*13:01	0.0340909		A*01:01g~B*57:01g~C*06:02g~DQB1*03:03	0.0195313		A*30:02g~B*18:01g~C*03:02g~DQB1*02:01~DRB1*03:01	0.00833333
A*01:01g~C*07:01g	0.0398314		B*42:01~DQB1*04:02~DRB1*03:02	0.0340909		A*03:01g~B*07:02g~C*07:02g~DRB1*01:01	0.0194805		A*11:01g~B*15:02g~C*08:01g~DQB1*03:01~DRB1*13:02	0.00833333
A*24:02g~C*07:02g	0.0392277		B*35:01g~C*04:01g~DQB1*05:01	0.03125		A*68:02g~B*14:02~C*08:02g~DRB1*13:03	0.0194805		A*24:02g~B*15:17~C*07:01g~DQB1*06:04~DRB1*12:02	0.00833333
C*07:01g~DQB1*03:01	0.0384615		A*03:01g~DQB1*05:01~DRB1*01:01	0.0294055		A*03:01g~B*07:02g~C*07:02g~DRB1*11:01	0.0194805		A*69:01~B*35:08~C*12:03g~DQB1*05:03~DRB1*14:01	0.00833333
C*06:02g~DRB1*07:01	0.0379747		A*03:01g~B*07:02g~DRB1*15:01	0.0292211		A*01:01g~B*57:01g~C*06:02g~DRB1*07:01	0.0194805		A*33:01g~B*14:02~C*08:02g~DQB1*05:01~DRB1*01:02	0.00833333
DQB1*03:02~DRB1*04:01	0.0367647		C*03:03g~DQB1*06:03~DRB1*13:01	0.0286885		A*30:01g~B*42:01~DQB1*04:02~DRB1*03:02	0.0189394		A*23:01g~B*49:01g~C*04:01g~DQB1*03:01~DRB1*11:01	0.00833333
B*08:01g~DRB1*03:01	0.0353114		B*57:01g~C*06:02g~DQB1*03:03	0.0273438		A*01:01g~B*57:01g~DQB1*03:03~DRB1*07:01	0.0189394		A*24:02g~B*15:01g~C*03:03g~DQB1*03:02~DRB1*04:04	0.00833333
B*40:06~C*15:02g	0.0348837		B*15:01g~C*03:03g~DRB1*13:01	0.025974		B*51:01g~C*02:02g~DQB1*06:02~DRB1*04:01	0.0166667		A*02:11g~B*15:01g~C*01:02g~DQB1*05:03~DRB1*14:04	0.00833333
B*35:01g~C*04:01g	0.0348837		A*01:01g~DQB1*03:03~DRB1*07:01	0.0257353		B*27:05g~C*01:02g~DQB1*03:02~DRB1*15:01	0.0166667		A*30:02g~B*81:01g~C*04:01g~DQB1*04:02~DRB1*08:04	0.00833333
A*11:01g~DQB1*06:03	0.0347222		A*01:01g~B*08:01g~DRB1*03:01	0.0253992		B*14:02~C*08:02g~DQB1*03:01~DRB1*13:03	0.0166667		A*26:01g~B*14:02~C*08:02g~DQB1*06:02~DRB1*15:03	0.00833333
A*24:02g~DQB1*03:01	0.0347222		A*03:01g~C*07:02g~DRB1*01:01	0.0253159		B*15:17~C*07:01g~DQB1*03:01~DRB1*11:01	0.0166667		A*24:07~B*08:01g~C*07:02g~DQB1*02:01~DRB1*03:01	0.00833333
DQB1*04:02~DRB1*03:02	0.0330883		C*07:01g~DQB1*03:01~DRB1*11:01	0.0245902		B*14:02~C*08:02g~DQB1*06:03~DRB1*13:01	0.0166667		A*02:01g~B*15:01g~C*03:03g~DQB1*03:02~DRB1*04:02	0.00833333
B*42:01~DQB1*04:02	0.0321429		C*05:01g~DQB1*05:01~DRB1*01:01	0.0245886		B*14:01~C*08:02g~DQB1*02:02~DRB1*07:01	0.0166667		A*02:01g~B*07:05g~C*12:02g~DQB1*05:03~DRB1*14:04	0.00833333
A*03:01g~DRB1*15:01	0.0316126		B*07:02g~C*07:02g~DQB1*03:01	0.0244348		B*07:02g~C*07:02g~DQB1*03:01~DRB1*11:01	0.0166667		A*24:02g~B*07:02g~C*07:02g~DQB1*04:02~DRB1*10:01	0.00833333
C*07:02g~DQB1*02:01	0.0311593		B*15:01g~C*03:03g~DQB1*06:03	0.0234405		B*18:01g~C*05:01g~DQB1*02:01~DRB1*03:01	0.0166667		A*24:02g~B*52:01g~C*07:02g~DQB1*06:01~DRB1*15:01	0.00833333
A*01:01g~B*08:01g	0.030387		B*44:02g~C*05:01g~DQB1*05:01	0.0234375		B*15:10~C*03:04g~DQB1*06:09~DRB1*13:02	0.0166667		A*68:02g~B*15:10~C*08:04~DQB1*06:02~DRB1*11:01	0.00833333
DQB1*05:01~DRB1*01:02	0.0294118		B*40:06~C*15:02g~DQB1*06:01	0.0234375		B*08:01g~C*07:02g~DQB1*02:01~DRB1*03:01	0.0166667		A*30:04g~B*15:03g~C*07:01g~DQB1*05:01~DRB1*11:04	0.00833333
DQB1*06:01~DRB1*15:02	0.0294118		B*15:17~C*07:01g~DQB1*03:01	0.0234375		B*07:02g~C*07:02g~DQB1*03:02~DRB1*04:01	0.0166667		A*32:01g~B*40:06~C*15:02g~DQB1*05:01~DRB1*04:05	0.00833333
B*15:01g~C*03:03g	0.0290698		A*03:01g~C*07:02g~DQB1*03:01	0.0230759		B*35:01g~C*04:01g~DQB1*05:01~DRB1*01:01	0.0166667		A*31:01g~B*27:05g~C*05:01g~DQB1*05:01~DRB1*01:01	0.00833333
B*52:01g~C*12:02g	0.0290698		B*51:01g~DQB1*06:02~DRB1*15:01	0.0227273		B*40:06~C*15:02g~DQB1*06:01~DRB1*15:02	0.0166658		A*68:01g~B*44:02g~C*07:04g~DQB1*04:02~DRB1*08:01	0.00833333
B*15:10~C*03:04g	0.0290698		B*44:02g~DQB1*05:01~DRB1*01:01	0.0227273		A*11:01g~C*03:03g~DQB1*06:03~DRB1*13:01	0.0163934		A*30:02g~B*42:01~C*17:01g~DQB1*04:02~DRB1*03:02	0.00833333
A*03:01g~DQB1*03:01	0.029007		A*68:01g~DQB1*02:01~DRB1*03:01	0.0220588		A*02:11g~C*15:02g~DQB1*06:01~DRB1*15:01	0.0163934		A*68:02g~B*15:10~C*03:04g~DQB1*06:09~DRB1*01:02	0.00833333
B*35:03g~DQB1*03:01	0.0285715		A*31:01g~DQB1*06:02~DRB1*15:01	0.0220588		A*33:01g~C*08:02g~DQB1*06:03~DRB1*13:01	0.0163934		A*30:02g~B*45:01g~C*16:01g~DQB1*05:01~DRB1*13:02	0.00833333
B*35:01g~DQB1*05:01	0.0285715		A*69:01~DQB1*03:01~DRB1*11:01	0.0220588		A*68:02g~C*08:02g~DQB1*02:02~DRB1*07:01	0.0163934		A*43:01~B*15:16~C*14:02g~DQB1*03:19~DRB1*11:02	0.00833333
B*15:01g~DQB1*03:02	0.0285714		A*11:01g~DQB1*03:02~DRB1*04:01	0.0220588		A*24:02g~C*07:02g~DQB1*06:02~DRB1*15:01	0.0163934		A*68:02g~B*81:01g~C*18:01g~DQB1*05:01~DRB1*15:02	0.00833333
A*68:02g~C*08:02g	0.0284091		A*03:01g~B*07:02g~DQB1*03:01	0.0214286		A*03:01g~C*07:02g~DQB1*03:01~DRB1*11:01	0.0163934		A*32:01g~B*15:01g~C*04:01g~DQB1*03:02~DRB1*04:03	0.00833333
A*03:01g~DQB1*03:02	0.0277778		A*11:01g~B*51:01g~DQB1*06:02	0.0214286		A*68:02g~C*08:02g~DQB1*03:01~DRB1*13:03	0.0163934		A*01:01g~B*35:03g~C*12:03g~DQB1*03:03~DRB1*07:01	0.00833333
DQB1*06:02~DRB1*15:03	0.0268468		C*17:01g~DQB1*04:02~DRB1*03:02	0.0204918		A*31:01g~C*02:02g~DQB1*03:02~DRB1*04:01	0.0163934		A*02:01g~B*58:01g~C*05:01g~DQB1*05:01~DRB1*11:02	0.00833333
B*42:01~DRB1*03:02	0.0266474		C*06:02g~DQB1*03:03~DRB1*07:01	0.0204918		A*69:01~C*07:01g~DQB1*03:01~DRB1*11:01	0.0163934		A*30:01g~B*53:01g~C*04:01g~DQB1*02:02~DRB1*01:02	0.00833333
DQB1*03:03~DRB1*07:01	0.0257353		B*42:01~C*17:01g~DQB1*04:02	0.0195312		A*02:01g~C*07:02g~DQB1*06:02~DRB1*15:01	0.0163934		A*02:05g~B*44:02g~C*07:01g~DQB1*03:19~DRB1*01:01	0.00833333
C*04:01g~DRB1*01:01	0.0253165		B*44:02g~C*05:01g~DRB1*01:01	0.0194805		A*03:01g~B*07:02g~C*07:02g~DQB1*05:01	0.015625		A*36:01~B*50:01g~C*06:02g~DQB1*05:01~DRB1*09:01	0.00833333
C*03:03g~DRB1*13:01	0.0253158		B*14:02~C*08:02g~DRB1*13:03	0.0194805		A*11:01g~B*15:01g~C*03:03g~DQB1*06:03	0.015625		A*29:02g~B*15:01g~C*07:02g~DQB1*06:02~DRB1*13:01	0.00833333
B*57:01g~DQB1*03:03	0.025		B*14:01~C*08:02g~DRB1*07:01	0.0194805		A*02:11g~B*40:06~C*15:02g~DQB1*06:01	0.015625		A*31:01g~B*07:02g~C*03:03g~DQB1*06:03~DRB1*15:01	0.00833333
A*01:01g~DQB1*03:03	0.0243056		B*42:01~C*17:01g~DRB1*03:02	0.0194805		A*33:01g~B*14:02~C*08:02g~DQB1*06:03	0.015625		A*26:01g~B*51:01g~C*14:02g~DQB1*03:01~DRB1*08:03	0.00833333
C*03:03g~DQB1*06:03	0.0240959		B*57:01g~C*06:02g~DRB1*07:01	0.0194805		A*68:02g~B*14:01~C*08:02g~DQB1*02:02	0.015625		A*68:01g~B*08:01g~C*07:02g~DQB1*02:01~DRB1*03:01	0.00833333
C*15:02g~DRB1*15:02	0.0240544		B*07:02g~C*07:02g~DRB1*11:01	0.0194805		A*31:01g~B*27:05g~C*02:02g~DQB1*06:02	0.015625		A*26:01g~B*38:01~C*12:03g~DQB1*06:03~DRB1*13:01	0.00833333
B*57:01g~C*06:02g	0.0232558		B*35:01g~C*04:01g~DRB1*01:01	0.0194805		A*11:01g~B*51:01g~C*01:02g~DQB1*03:02	0.015625		A*24:02g~B*07:02g~C*07:02g~DQB1*02:01~DRB1*03:01	0.00833333
B*44:02g~C*05:01g	0.0232558		B*27:05g~C*01:02g~DRB1*04:01	0.0194803		A*24:02g~B*07:02g~C*07:02g~DQB1*04:02	0.015625		A*11:01g~B*18:01g~C*05:01g~DQB1*06:03~DRB1*13:01	0.00833333
C*15:02g~DQB1*06:01	0.0230769		A*01:01g~C*06:02g~DQB1*03:03	0.0192308		A*69:01~B*35:08~C*12:03g~DQB1*05:03	0.015625		A*68:01g~B*08:01g~C*07:01g~DQB1*02:01~DRB1*03:01	0.00833333
C*08:02g~DQB1*04:02	0.0230769		A*03:01g~C*07:02g~DRB1*11:01	0.0189874		A*02:01g~B*52:01g~C*12:02g~DQB1*06:01	0.015625		A*32:01g~B*38:01~C*12:03g~DQB1*03:01~DRB1*10:01	0.00833333
C*17:01g~DQB1*02:02	0.0230769		A*68:02g~C*08:02g~DRB1*13:03	0.0189874		A*01:01g~B*35:01g~C*04:01g~DQB1*05:01	0.015625		A*02:01g~B*40:01g~C*03:04g~DQB1*06:04~DRB1*13:02	0.00833333
C*06:02g~DQB1*02:02	0.0230769		A*01:01g~C*06:02g~DRB1*07:01	0.0189874		A*02:01g~B*58:01g~C*03:04g~DQB1*06:02	0.015625		A*24:02g~B*07:05g~C*07:26~DQB1*03:02~DRB1*04:01	0.00833333
A*02:11g~C*15:02g	0.0227273		A*02:11g~C*15:02g~DRB1*15:02	0.0189873		A*02:01g~B*07:02g~C*07:02g~DQB1*06:02	0.015625		A*02:01g~B*07:05g~C*15:05g~DQB1*05:01~DRB1*11:04	0.00833333
A*02:01g~C*02:02g	0.0227273		A*11:01g~C*01:02g~DRB1*15:01	0.0189868		A*68:02g~B*14:02~C*08:02g~DQB1*03:01	0.015625		A*02:01g~B*07:02g~C*07:02g~DQB1*04:02~DRB1*04:10	0.00833333
A*02:01g~C*06:02g	0.0227273		B*57:01g~DQB1*03:03~DRB1*07:01	0.0189394		A*24:02g~B*07:02g~C*07:02g~DQB1*06:02	0.015625		A*69:01~B*35:08~C*12:03g~DQB1*05:03~DRB1*14:54	0.00833333
A*01:01g~C*04:01g	0.0226686		A*30:01g~DQB1*04:02~DRB1*03:02	0.0183824		A*69:01~B*15:17~C*07:01g~DQB1*03:01	0.015625		A*03:01g~B*07:02g~C*07:02g~DQB1*03:01~DRB1*01:01	0.00833333
C*01:02g~DQB1*05:01	0.0226291		A*24:02g~C*07:02g~DRB1*15:01	0.0180655		A*24:02g~B*07:02g~DQB1*06:02~DRB1*15:01	0.0151515		A*01:01g~B*44:02g~C*01:02g~DQB1*03:01~DRB1*01:01	0.00833333
A*01:01g~DRB1*03:01	0.0224487		B*40:06~C*15:02g~DRB1*15:02	0.0179169		A*03:01g~B*07:02g~DQB1*05:01~DRB1*01:01	0.0151515		A*03:01g~B*27:05g~C*05:01g~DQB1*05:01~DRB1*04:01	0.00833333
B*07:02g~DQB1*03:01	0.022269		A*02:01g~B*07:02g~DQB1*06:02	0.0178574		A*03:01g~B*07:02g~DQB1*03:01~DRB1*11:01	0.0151515		A*68:01g~B*58:02~C*04:01g~DQB1*05:01~DRB1*04:05	0.00833333
C*07:02g~DRB1*11:01	0.0220648		A*01:01g~B*57:01g~DQB1*03:03	0.0178571		A*68:01g~B*08:01g~DQB1*02:01~DRB1*03:01	0.0151515		A*30:01g~B*35:01g~C*06:02g~DQB1*03:02~DRB1*12:01	0.00833333
DQB1*05:03~DRB1*14:04	0.0220588		A*30:01g~B*42:01~DQB1*04:02	0.0178571		A*33:01g~B*14:02~DQB1*06:03~DRB1*13:01	0.0151515		A*30:01g~B*13:02g~C*06:02g~DQB1*02:02~DRB1*07:01	0.00833333
DQB1*06:09~DRB1*13:02	0.0220588		A*24:02g~B*07:02g~DQB1*06:02	0.0178569		A*68:02g~B*15:10~DQB1*05:01~DRB1*01:02	0.0151515		A*33:03g~B*15:16~C*14:02g~DQB1*05:03~DRB1*11:17	0.00833333
C*07:02g~DQB1*03:02	0.0220541		A*68:02g~B*15:10~C*03:04g	0.0177649		A*11:01g~B*15:01g~DQB1*06:03~DRB1*13:01	0.0151515		A*03:01g~B*27:05g~C*02:02g~DQB1*06:01~DRB1*04:08	0.00833333
C*12:03g~DQB1*03:01	0.021724		A*02:01g~B*07:02g~C*07:02g	0.0174419		A*68:02g~B*14:01~DQB1*02:02~DRB1*07:01	0.0151515		A*02:01g~B*52:01g~C*12:02g~DQB1*03:01~DRB1*15:02	0.00833333
B*27:05g~C*02:02g	0.021643		A*33:01g~B*14:02~C*08:02g	0.0174419		A*02:11g~B*40:06~DQB1*06:01~DRB1*15:01	0.0151515		A*23:01g~B*44:03~C*04:01g~DQB1*02:02~DRB1*07:01	0.00833333
B*15:01g~DQB1*06:03	0.0214286		A*02:11g~B*40:06~C*15:02g	0.0174419		A*31:01g~B*27:05g~DQB1*03:02~DRB1*04:01	0.0151515		A*68:01g~B*15:10~C*03:04g~DQB1*02:01~DRB1*04:04	0.00833333
B*51:01g~DQB1*06:02	0.0214286		A*02:01g~B*38:01~C*12:03g	0.0174419		A*68:02g~B*14:02~DQB1*03:01~DRB1*13:03	0.0151515		A*68:02g~B*58:02~C*06:02g~DQB1*04:02~DRB1*03:01	0.00833333
B*15:17~DQB1*03:01	0.0214286		A*02:01g~B*52:01g~C*12:02g	0.0174419		A*69:01~B*15:17~DQB1*03:01~DRB1*11:01	0.0151515		A*02:01g~B*40:06~C*07:04g~DQB1*06:01~DRB1*04:01	0.00833333
B*58:01g~DQB1*06:02	0.0214286		A*68:02g~B*14:02~C*08:02g	0.0174419		A*31:01g~B*35:03g~DQB1*03:01~DRB1*13:01	0.0151515		A*68:01g~B*15:18g~C*15:02g~DQB1*03:02~DRB1*15:02	0.00833333
B*35:08~DQB1*05:03	0.0214286		A*01:01g~B*57:01g~C*06:02g	0.0174419		A*11:01g~B*35:01g~DQB1*06:03~DRB1*11:01	0.0151515		A*02:05g~B*58:01g~C*06:02g~DQB1*03:01~DRB1*15:03	0.00833333
B*40:06~DQB1*06:01	0.0214286		C*01:02g~DQB1*05:01~DRB1*01:01	0.0163951		A*24:02g~B*15:01g~DQB1*03:02~DRB1*04:04	0.0151515		A*02:01g~B*44:02g~C*03:04g~DQB1*06:02~DRB1*12:01	0.00833333
B*44:02g~DQB1*05:01	0.0214286		C*07:02g~DQB1*02:01~DRB1*03:01	0.0163938		A*11:01g~B*15:01g~C*03:03g~DRB1*13:01	0.012987		A*11:01g~B*51:01g~C*15:02g~DQB1*06:02~DRB1*15:01	0.00833333
A*02:01g~DQB1*06:02	0.0208333		C*15:02g~DQB1*06:01~DRB1*15:02	0.0163934		A*68:02g~B*15:10~C*08:04~DRB1*11:01	0.012987		A*03:01g~B*15:10~C*03:04g~DQB1*06:09~DRB1*11:01	0.00833333
A*30:01g~DQB1*02:02	0.0208333		C*01:02g~DQB1*06:02~DRB1*15:01	0.0163934		A*33:01g~B*14:02~C*08:02g~DRB1*13:01	0.012987		A*02:01g~B*51:01g~C*01:02g~DQB1*03:03~DRB1*13:01	0.00833333
A*68:02g~DQB1*05:01	0.0208333		C*02:02g~DQB1*03:02~DRB1*04:01	0.0163934		A*11:01g~B*27:05g~C*01:02g~DRB1*04:01	0.012987		A*02:01g~B*58:01g~C*03:02g~DQB1*06:02~DRB1*13:02	0.00833333
A*68:02g~DQB1*04:02	0.0208333		C*08:02g~DQB1*02:02~DRB1*07:01	0.0163934		A*31:01g~B*51:01g~C*02:02g~DRB1*15:01	0.012987		A*11:01g~B*35:01g~C*04:01g~DQB1*03:02~DRB1*04:01	0.00833333
A*68:01g~DQB1*02:01	0.0208333		C*08:02g~DQB1*03:01~DRB1*13:03	0.0163934		A*26:01g~B*38:01~C*12:03g~DRB1*13:01	0.012987		A*01:01g~B*35:01g~C*04:01g~DQB1*05:01~DRB1*01:01	0.00833333
A*31:01g~DQB1*06:02	0.0208333		C*03:04g~DQB1*06:09~DRB1*13:02	0.0163934		A*02:01g~B*52:01g~C*12:02g~DRB1*14:04	0.012987		A*11:01g~B*18:01g~C*07:02g~DQB1*06:01~DRB1*15:02	0.00833333
A*02:01g~DQB1*06:01	0.0208333		C*07:02g~DQB1*03:01~DRB1*11:01	0.0163934		A*69:01~B*15:17~C*07:01g~DRB1*11:01	0.012987		A*11:01g~B*56:01g~C*01:02g~DQB1*05:01~DRB1*01:01	0.00833333
A*01:01g~DQB1*05:01	0.0208333		C*07:02g~DQB1*03:02~DRB1*04:01	0.0163934		A*02:01g~B*07:02g~C*07:02g~DRB1*15:01	0.012987		A*33:03g~B*58:02~C*06:02g~DQB1*03:19~DRB1*13:01	0.00833333
A*02:01g~DQB1*05:01	0.0208333		C*04:01g~DQB1*05:01~DRB1*01:01	0.0163934		A*30:01g~B*42:01~C*17:01g~DRB1*03:02	0.012987		A*03:01g~B*53:01g~C*04:01g~DQB1*06:04~DRB1*08:04	0.00833333
A*24:02g~DQB1*06:02	0.0208333		C*05:01g~DQB1*02:01~DRB1*03:01	0.0163931		A*30:02g~B*14:01~C*08:02g~DRB1*07:01	0.012987		A*26:01g~B*38:01~C*12:03g~DQB1*06:40~DRB1*13:01	0.00416667
A*02:01g~DQB1*03:02	0.0208333		A*30:01g~B*42:01~DRB1*03:02	0.0157469		A*02:11g~B*40:06~C*15:02g~DRB1*15:02	0.0129861		A*26:01g~B*38:01~C*12:03g~DQB1*06:11~DRB1*13:01	0.00416667
C*06:02g~DQB1*03:03	0.0192308		B*27:05g~C*01:02g~DQB1*03:02	0.015625		A*30:01g~C*17:01g~DQB1*04:02~DRB1*03:02	0.0122951		A*01:01g~B*57:01g~C*06:02g~DQB1*03:30~DRB1*07:01	0.00416667
C*08:02g~DRB1*13:03	0.0189874		B*51:01g~C*02:02g~DQB1*06:02	0.015625		A*30:01g~B*42:01~C*17:01g~DQB1*04:02	0.0117188		A*30:01g~B*42:01~C*17:01g~DQB1*04:04~DRB1*03:02	0.00416667
C*03:04g~DRB1*13:02	0.0189874		B*07:05g~C*15:05g~DQB1*03:01	0.015625		A*24:02g~B*07:02g~C*07:02g~DRB1*15:01	0.011085		A*02:02~B*57:03~C*07:01g~DQB1*05:01~DRB1*01:02	0.00208333
C*17:01g~DRB1*03:02	0.0189874		B*14:02~C*08:02g~DQB1*06:03	0.015625		A*01:01g~B*08:01g~C*07:01g~DRB1*15:01	0.00839549		A*02:02~B*57:03~C*07:02g~DQB1*05:01~DRB1*01:02	0.00104167
C*08:02g~DRB1*07:01	0.0189874		B*58:01g~C*03:02g~DQB1*06:02	0.015625		A*24:02g~B*07:02g~C*07:02g~DRB1*03:01	0.00839549		A*02:02~B*57:03~C*07:47~DQB1*05:01~DRB1*01:02	0.00104167
C*02:02g~DRB1*04:01	0.0189858		B*35:08~C*12:03g~DQB1*05:03	0.015625		B*40:06~C*15:02g~DQB1*06:01~DRB1*15:01	0.00833418		A*02:02~B*57:03~C*07:46~DQB1*05:01~DRB1*01:02	0.00104167
A*02:01g~C*07:02g	0.018894		B*14:01~C*08:02g~DQB1*02:02	0.015625		B*38:01~C*12:03g~DQB1*03:02~DRB1*04:02	0.00833334		A*02:02~B*57:03~C*07:45~DQB1*05:01~DRB1*01:02	0.00104167
C*01:02g~DRB1*01:01	0.018681		B*52:01g~C*12:02g~DQB1*06:01	0.015625		B*15:32~C*12:03g~DQB1*03:01~DRB1*12:02	0.00833334		A*02:02~B*57:03~C*07:28~DQB1*05:01~DRB1*01:02	0.00104167
C*07:01g~DRB1*11:01	0.0182836		B*15:10~C*03:04g~DQB1*06:09	0.015625		B*14:02~C*08:02g~DQB1*05:01~DRB1*01:02	0.00833334		A*02:02~B*57:03~C*07:22~DQB1*05:01~DRB1*01:02	0.00104167
A*03:01g~C*04:01g	0.0182669		B*08:01g~C*07:02g~DQB1*02:01	0.015625		B*58:01g~C*07:01g~DQB1*03:19~DRB1*11:02	0.00833334
A*24:02g~B*07:02g	0.0182651		B*18:01g~C*05:01g~DQB1*02:01	0.015625		B*07:05g~C*12:03g~DQB1*03:01~DRB1*11:04	0.00833334
C*07:02g~DRB1*03:01	0.017992		B*07:02g~C*07:02g~DQB1*05:01	0.015625		B*27:05g~C*07:04g~DQB1*04:02~DRB1*08:01	0.00833334
A*02:01g~DRB1*04:01	0.0174419		B*07:02g~C*07:02g~DQB1*03:02	0.015625		B*38:01~C*15:05g~DQB1*05:01~DRB1*10:01	0.00833334
B*38:01~C*12:03g	0.0174419		B*15:01g~C*03:03g~DQB1*03:02	0.015622		B*52:01g~C*12:02g~DQB1*03:01~DRB1*15:02	0.00833334
B*15:17~C*07:01g	0.0174419		A*24:02g~C*03:03g~DQB1*03:01	0.0153856		B*27:05g~C*02:02g~DQB1*06:01~DRB1*04:08	0.00833334
B*58:01g~C*03:02g	0.0174419		A*11:01g~C*01:02g~DQB1*06:02	0.0153846		B*15:02g~C*07:01g~DQB1*03:01~DRB1*12:02	0.00833334
B*18:01g~C*05:01g	0.0174419		A*02:11g~C*15:02g~DQB1*06:01	0.0153846		B*15:17~C*08:01g~DQB1*06:04~DRB1*13:02	0.00833334
B*58:02~C*06:02g	0.0174419		A*33:01g~C*08:02g~DQB1*06:03	0.0153846		B*07:02g~C*07:02g~DQB1*03:01~DRB1*01:01	0.00833334
B*14:01~C*08:02g	0.0174419		A*24:02g~C*07:02g~DQB1*06:02	0.0153846		B*35:03g~C*12:03g~DQB1*03:03~DRB1*07:01	0.00833334
B*42:01~C*17:01g	0.0174419		A*69:01~C*12:03g~DQB1*05:03	0.0153846		B*27:05g~C*01:02g~DQB1*03:01~DRB1*04:01	0.00833334
A*68:02g~C*03:04g	0.0173605		A*24:02g~C*07:02g~DQB1*04:02	0.0153846		B*49:01g~C*07:01g~DQB1*03:01~DRB1*11:01	0.00833334
A*24:02g~C*03:03g	0.0170455		A*02:01g~C*12:02g~DQB1*06:01	0.0153846		B*15:03g~C*04:01g~DQB1*05:01~DRB1*11:04	0.00833334
A*33:01g~C*08:02g	0.0170455		A*31:01g~C*02:02g~DQB1*03:02	0.0153846		B*35:08~C*12:03g~DQB1*05:03~DRB1*14:01	0.00833334
A*30:01g~C*17:01g	0.0170455		A*68:02g~C*08:02g~DQB1*03:01	0.0153846		B*58:01g~C*03:02g~DQB1*06:02~DRB1*15:03	0.00833334
A*31:01g~C*02:02g	0.0170455		A*69:01~C*07:01g~DQB1*03:01	0.0153846		B*15:18g~C*07:04g~DQB1*03:02~DRB1*04:01	0.00833334
A*30:01g~C*06:02g	0.0170455		A*03:01g~C*04:01g~DQB1*03:02	0.0153846		B*57:03~C*08:04~DQB1*05:01~DRB1*11:01	0.00833334
A*01:01g~C*06:02g	0.0170455		A*01:01g~C*04:01g~DQB1*05:01	0.0153846		B*15:01g~C*03:03g~DQB1*03:02~DRB1*04:04	0.00833334
A*11:01g~C*01:02g	0.0168152		A*02:01g~C*03:04g~DQB1*06:02	0.0153846		B*40:01g~C*03:04g~DQB1*06:04~DRB1*13:02	0.00833334
C*03:03g~DQB1*03:01	0.0167376		A*02:01g~C*07:02g~DQB1*06:02	0.0153846		B*51:01g~C*15:02g~DQB1*06:02~DRB1*15:01	0.00833334
A*23:01g~C*04:01g	0.0165908		A*03:01g~C*01:02g~DQB1*05:01	0.0153846		B*07:02g~C*07:02g~DQB1*05:01~DRB1*01:01	0.00833334
C*07:01g~DRB1*15:01	0.0165342		A*30:02g~C*08:02g~DQB1*04:02	0.0153846		B*15:01g~C*04:01g~DQB1*03:02~DRB1*04:03	0.00833334
A*30:02g~DRB1*15:03	0.016427		A*30:01g~C*06:02g~DQB1*02:02	0.0153846		B*81:01g~C*18:01g~DQB1*03:19~DRB1*15:02	0.00833334
C*04:01g~DQB1*03:02	0.0164074		B*15:01g~DQB1*03:02~DRB1*04:04	0.0151515		B*15:16~C*14:02g~DQB1*05:01~DRB1*11:02	0.00833334
A*01:01g~DRB1*07:01	0.0163514		B*27:05g~DQB1*03:02~DRB1*04:01	0.0151515		B*51:01g~C*01:02g~DQB1*03:03~DRB1*13:01	0.00833334
A*02:01g~DRB1*13:01	0.0161743		B*07:02g~DQB1*03:01~DRB1*11:01	0.0151515		B*51:01g~C*14:02g~DQB1*03:01~DRB1*08:03	0.00833334
C*01:02g~DQB1*06:02	0.0158325		B*15:17~DQB1*03:01~DRB1*11:01	0.0151515		B*58:01g~C*03:02g~DQB1*06:02~DRB1*11:01	0.00833334
B*51:01g~C*01:02g	0.015829		B*35:01g~DQB1*05:01~DRB1*01:01	0.0151515		B*45:01g~C*16:01g~DQB1*05:01~DRB1*01:02	0.00833334
A*03:01g~DRB1*01:01	0.015454		B*07:02g~DQB1*03:02~DRB1*04:01	0.0151515		B*35:08~C*12:03g~DQB1*05:03~DRB1*14:54	0.00833334
C*07:02g~DQB1*03:03	0.0153846		B*14:02~DQB1*03:01~DRB1*13:03	0.0151515		B*15:01g~C*01:02g~DQB1*05:03~DRB1*14:04	0.00833334
C*05:01g~DQB1*05:01	0.0153846		B*58:01g~DQB1*06:02~DRB1*15:03	0.0151515		B*14:02~C*04:01g~DQB1*06:02~DRB1*15:03	0.00833334
C*02:02g~DQB1*03:02	0.0153846		B*14:01~DQB1*02:02~DRB1*07:01	0.0151515		B*81:01g~C*08:02g~DQB1*04:02~DRB1*08:04	0.00833334
C*08:02g~DQB1*06:03	0.0153846		B*18:01g~DQB1*02:01~DRB1*03:01	0.0151515		B*07:02g~C*15:02g~DQB1*04:02~DRB1*04:05	0.00833334
C*03:02g~DQB1*06:02	0.0153846		B*35:03g~DQB1*06:03~DRB1*13:01	0.0151515		B*40:06~C*07:02g~DQB1*05:01~DRB1*10:01	0.00833334
C*08:02g~DQB1*03:01	0.0153846		B*35:01g~DQB1*03:01~DRB1*11:01	0.0151515		B*07:05g~C*07:26~DQB1*04:02~DRB1*04:10	0.00833334
C*12:02g~DQB1*06:01	0.0153846		B*15:10~DQB1*05:01~DRB1*01:02	0.0151515		B*44:02g~C*03:04g~DQB1*06:02~DRB1*15:03	0.00833334
C*03:04g~DQB1*06:09	0.0153846		B*40:06~DQB1*06:01~DRB1*15:02	0.015151		B*58:01g~C*06:02g~DQB1*03:01~DRB1*12:01	0.00833334
C*07:02g~DQB1*05:03	0.0153846		A*02:01g~DQB1*06:02~DRB1*15:01	0.0147059		B*44:03~C*04:01g~DQB1*02:02~DRB1*07:01	0.00833334
DQB1*06:01~DRB1*15:01	0.0147059		A*30:02g~DQB1*06:02~DRB1*15:03	0.0147059		B*53:01g~C*06:02g~DQB1*05:01~DRB1*01:02	0.00833334
DQB1*03:01~DRB1*12:02	0.0147059		A*68:02g~DQB1*02:02~DRB1*07:01	0.0147059		B*50:01g~C*04:01g~DQB1*02:02~DRB1*09:01	0.00833334
DQB1*06:02~DRB1*11:01	0.0147059		A*33:01g~DQB1*06:03~DRB1*13:01	0.0147059		B*07:02g~C*07:02g~DQB1*06:03~DRB1*13:01	0.00833334
DQB1*03:02~DRB1*04:04	0.0147059		A*24:02g~DQB1*03:01~DRB1*12:02	0.0147059		B*15:16~C*14:02g~DQB1*05:03~DRB1*11:17	0.00833334
DQB1*03:19~DRB1*11:02	0.0147059		A*68:02g~DQB1*05:01~DRB1*01:02	0.0147059		B*13:02g~C*06:02g~DQB1*02:02~DRB1*07:01	0.00833334
DQB1*03:01~DRB1*13:03	0.0147059		A*24:02g~DQB1*03:02~DRB1*04:04	0.0147059		B*53:01g~C*06:02g~DQB1*03:19~DRB1*13:01	0.00833334
DQB1*03:02~DRB1*04:03	0.0147059		A*02:11g~DQB1*06:01~DRB1*15:01	0.0147059		B*58:02~C*04:01g~DQB1*06:04~DRB1*08:04	0.00833334
DQB1*03:01~DRB1*11:04	0.0147059		A*32:01g~DQB1*05:01~DRB1*10:01	0.0147059		B*52:01g~C*07:02g~DQB1*06:01~DRB1*14:04	0.00833334
DQB1*06:04~DRB1*13:02	0.0147059		A*68:02g~DQB1*03:01~DRB1*13:03	0.0147059		B*07:05g~C*12:02g~DQB1*05:03~DRB1*15:01	0.00833334
DQB1*05:01~DRB1*10:01	0.0147051		A*31:01g~DQB1*03:01~DRB1*11:01	0.0147059		B*56:01g~C*01:02g~DQB1*05:01~DRB1*01:01	0.00833334
B*15:01g~DRB1*13:01	0.0146935		A*02:01g~DQB1*03:02~DRB1*04:01	0.0147059		B*35:01g~C*06:02g~DQB1*03:02~DRB1*04:05	0.00833334
A*11:01g~DRB1*13:01	0.0145349		A*02:01g~DQB1*05:01~DRB1*01:01	0.0147059		B*15:10~C*06:02g~DQB1*02:01~DRB1*04:04	0.00833334
A*68:02g~B*15:10	0.0144855		A*11:01g~DQB1*06:02~DRB1*15:01	0.0146996		B*58:02~C*04:01g~DQB1*05:01~DRB1*12:01	0.00833334
B*27:05g~DQB1*03:02	0.0142857		B*14:02~C*08:02g~DQB1*03:01	0.0146277		B*58:02~C*03:04g~DQB1*04:02~DRB1*03:01	0.00833334
B*44:03~DQB1*02:02	0.0142857		A*03:01g~B*07:02g~DQB1*05:01	0.0142857		B*18:01g~C*07:02g~DQB1*06:01~DRB1*15:02	0.00833334
B*41:01~DQB1*02:02	0.0142857		A*24:02g~B*07:02g~DQB1*04:02	0.0142857		B*49:01g~C*07:01g~DQB1*05:03~DRB1*15:01	0.0083325
B*52:01g~DQB1*06:01	0.0142857		A*33:01g~B*14:02~DQB1*06:03	0.0142857		A*26:01g~C*05:01g~DQB1*06:02~DRB1*15:03	0.00819672
B*07:05g~DQB1*03:01	0.0142857		A*68:01g~B*08:01g~DQB1*02:01	0.0142857		A*30:02g~C*03:02g~DQB1*02:01~DRB1*03:01	0.00819672
B*18:01g~DQB1*02:01	0.0142857		A*11:01g~B*15:01g~DQB1*06:03	0.0142857		A*23:01g~C*07:01g~DQB1*05:03~DRB1*15:02	0.00819672
B*14:01~DQB1*02:02	0.0142857		A*68:02g~B*15:10~DQB1*05:01	0.0142857		A*24:02g~C*12:03g~DQB1*03:01~DRB1*12:02	0.00819672
B*35:01g~DQB1*06:03	0.0142857		A*68:02g~B*14:01~DQB1*02:02	0.0142857		A*69:01~C*12:03g~DQB1*05:03~DRB1*14:01	0.00819672
B*27:05g~DQB1*03:01	0.0142857		A*69:01~B*35:08~DQB1*05:03	0.0142857		A*24:02g~C*08:01g~DQB1*03:01~DRB1*12:02	0.00819672
B*07:02g~DQB1*03:02	0.0142857		A*02:11g~B*40:06~DQB1*06:01	0.0142857		A*11:01g~C*07:01g~DQB1*06:04~DRB1*13:02	0.00819672
B*14:02~DQB1*06:03	0.0142857		A*31:01g~B*27:05g~DQB1*03:02	0.0142857		A*30:04g~C*04:01g~DQB1*05:01~DRB1*11:01	0.00819672
B*07:02g~DQB1*05:01	0.0142857		A*02:01g~B*52:01g~DQB1*06:01	0.0142857		A*23:01g~C*07:01g~DQB1*03:01~DRB1*11:04	0.00819672
B*15:10~DQB1*06:09	0.014285		A*01:01g~B*35:01g~DQB1*05:01	0.0142857		A*25:01g~C*07:01g~DQB1*02:01~DRB1*03:01	0.00819672
C*07:02g~DRB1*13:01	0.0140379		A*02:01g~B*58:01g~DQB1*06:02	0.0142857		A*02:02~C*08:04~DQB1*06:02~DRB1*11:01	0.00819672
A*26:01g~DQB1*06:02	0.0138889		A*11:01g~B*35:03g~DQB1*03:01	0.0142857		A*30:02g~C*17:01g~DQB1*04:02~DRB1*03:02	0.00819672
A*24:02g~DQB1*04:02	0.0138889		A*31:01g~B*35:01g~DQB1*06:03	0.0142857		A*26:01g~C*04:01g~DQB1*04:02~DRB1*15:03	0.00819672
A*33:01g~DQB1*06:03	0.0138889		A*03:01g~B*27:05g~DQB1*03:01	0.0142857		A*30:02g~C*08:02g~DQB1*06:02~DRB1*08:04	0.00819672
A*69:01~DQB1*05:03	0.0138889		A*68:02g~B*14:02~DQB1*03:01	0.0142857		A*01:01g~C*12:03g~DQB1*03:03~DRB1*07:01	0.00819672
A*33:03g~DQB1*05:03	0.0138889		A*69:01~B*15:17~DQB1*03:01	0.0142857		A*24:02g~C*12:02g~DQB1*06:01~DRB1*14:04	0.00819672
A*02:11g~DQB1*06:01	0.0138889		C*07:02g~DQB1*06:03~DRB1*13:01	0.0132705		A*02:01g~C*07:02g~DQB1*05:03~DRB1*15:01	0.00819672
A*68:01g~DQB1*03:02	0.0138889		A*01:01g~B*57:01g~DRB1*07:01	0.0129871		A*33:01g~C*08:02g~DQB1*05:01~DRB1*01:02	0.00819672
A*69:01~DQB1*03:01	0.0138889		B*15:10~C*08:04~DRB1*11:01	0.012987		A*30:02g~C*03:04g~DQB1*05:01~DRB1*13:02	0.00819672
A*31:01g~DQB1*03:01	0.0138889		B*14:02~C*08:02g~DRB1*13:01	0.012987		A*26:01g~C*03:03g~DQB1*03:02~DRB1*04:02	0.00819672
A*11:01g~DQB1*03:02	0.0138889		B*08:01g~C*07:02g~DRB1*03:01	0.012987		A*68:02g~C*16:01g~DQB1*06:09~DRB1*01:02	0.00819672
A*11:01g~DQB1*05:01	0.0138889		B*15:10~C*03:04g~DRB1*13:02	0.012987		A*24:02g~C*15:02g~DQB1*04:02~DRB1*04:05	0.00819672
A*03:01g~DQB1*03:03	0.0138889		B*18:01g~C*05:01g~DRB1*03:01	0.012987		A*32:01g~C*07:02g~DQB1*05:01~DRB1*10:01	0.00819672
A*33:01g~B*14:02	0.0138123		B*13:02g~C*06:02g~DRB1*07:01	0.012987		A*68:02g~C*14:02g~DQB1*05:01~DRB1*11:02	0.00819672
A*02:01g~B*07:02g	0.0135093		B*15:10~C*03:04g~DRB1*03:01	0.012987		A*43:01~C*18:01g~DQB1*03:19~DRB1*15:02	0.00819672
B*14:02~DQB1*03:01	0.0134453		B*15:17~C*07:01g~DRB1*11:01	0.012987		A*68:01g~C*05:01g~DQB1*05:01~DRB1*01:01	0.00819672
B*51:01g~DRB1*15:01	0.013338		B*07:02g~C*07:02g~DRB1*04:01	0.012987		A*31:01g~C*07:04g~DQB1*04:02~DRB1*08:01	0.00819672
A*02:01g~DRB1*07:01	0.0132969		B*07:02g~C*07:02g~DRB1*01:01	0.012987		A*02:01g~C*12:03g~DQB1*06:03~DRB1*13:01	0.00819672
A*30:01g~DRB1*03:02	0.0129927		B*51:01g~C*02:02g~DRB1*15:01	0.0129868		A*24:02g~C*03:03g~DQB1*03:02~DRB1*04:04	0.00819672
C*01:02g~DRB1*15:01	0.0129646		A*02:01g~C*07:02g~DRB1*15:01	0.0126582		A*32:01g~C*04:01g~DQB1*03:02~DRB1*04:03	0.00819672
C*15:02g~DRB1*15:01	0.0128951		A*11:01g~C*03:03g~DRB1*13:01	0.0126582		A*24:07~C*01:02g~DQB1*02:01~DRB1*03:01	0.00819672
C*07:02g~DRB1*04:01	0.0126598		A*33:01g~C*08:02g~DRB1*13:01	0.0126582		A*02:11g~C*07:02g~DQB1*05:03~DRB1*14:04	0.00819672
A*68:02g~DQB1*03:01	0.0126597		A*68:02g~C*08:04~DRB1*11:01	0.0126582		A*11:01g~C*05:01g~DQB1*06:03~DRB1*13:01	0.00819672
C*12:03g~DRB1*13:01	0.0126589		A*26:01g~C*12:03g~DRB1*13:01	0.0126582		A*30:01g~C*04:01g~DQB1*02:02~DRB1*01:02	0.00819672
C*05:01g~DRB1*01:01	0.0126582		A*02:01g~C*05:01g~DRB1*11:01	0.0126582		A*24:02g~C*07:02g~DQB1*02:01~DRB1*03:01	0.00819672
C*04:01g~DRB1*11:04	0.0126582		A*31:01g~C*02:02g~DRB1*04:01	0.0126582		A*36:01~C*06:02g~DQB1*05:01~DRB1*09:01	0.00819672
C*07:01g~DRB1*13:02	0.0126582		A*02:01g~C*03:04g~DRB1*13:02	0.0126582		A*26:01g~C*03:04g~DQB1*06:04~DRB1*13:02	0.00819672
C*16:01g~DRB1*01:02	0.0126582		A*02:01g~C*06:02g~DRB1*07:01	0.0126582		A*02:05g~C*07:01g~DQB1*03:19~DRB1*11:02	0.00819672
C*03:04g~DRB1*03:01	0.0126582		A*02:01g~C*07:04g~DRB1*15:02	0.0126582		A*02:01g~C*05:01g~DQB1*05:01~DRB1*01:01	0.00819672
C*04:01g~DRB1*08:04	0.0126582		A*23:01g~C*04:01g~DRB1*07:01	0.0126582		A*29:02g~C*03:03g~DQB1*06:02~DRB1*15:01	0.00819672
C*06:02g~DRB1*12:01	0.0126582		A*69:01~C*07:01g~DRB1*11:01	0.0126582		A*31:01g~C*07:02g~DQB1*06:03~DRB1*13:01	0.00819672
C*04:01g~DRB1*07:01	0.0126582		A*02:01g~C*12:02g~DRB1*14:04	0.0126582		A*32:01g~C*15:05g~DQB1*05:01~DRB1*11:04	0.00819672
C*05:01g~DRB1*04:01	0.0126582		A*30:02g~C*08:02g~DRB1*07:01	0.0126582		A*02:01g~C*12:03g~DQB1*03:01~DRB1*10:01	0.00819672
A*30:01g~B*42:01	0.0124313		A*30:01g~C*17:01g~DRB1*03:02	0.0126582		A*69:01~C*12:03g~DQB1*05:03~DRB1*14:54	0.00819672
A*02:01g~C*03:04g	0.0120625		A*24:02g~DQB1*06:02~DRB1*15:01	0.0125523		A*30:01g~C*04:01g~DQB1*05:01~DRB1*04:05	0.00819672
B*13:02g~DRB1*07:01	0.0120156		C*12:03g~DQB1*06:03~DRB1*13:01	0.012295		A*68:01g~C*06:02g~DQB1*03:02~DRB1*12:01	0.00819672
A*02:01g~B*13:02g	0.0118391		A*23:01g~B*49:01g~C*07:01g	0.0116279		A*26:01g~C*14:02g~DQB1*03:01~DRB1*08:03	0.00819672
C*12:02g~DRB1*14:04	0.0116331		A*68:02g~B*15:10~C*08:04	0.0116279		A*68:01g~C*07:02g~DQB1*02:01~DRB1*03:01	0.00819672
B*27:05g~DRB1*04:01	0.011628		A*69:01~B*35:08~C*12:03g	0.0116279		A*02:01g~C*07:26~DQB1*04:02~DRB1*04:01	0.00819672
B*14:02~DRB1*01:02	0.011628		A*31:01g~B*27:05g~C*01:02g	0.0116279		A*24:02g~C*07:02g~DQB1*03:02~DRB1*04:10	0.00819672
B*57:01g~DRB1*07:01	0.011628		A*11:01g~B*51:01g~C*02:02g	0.0116279		A*68:01g~C*07:01g~DQB1*02:01~DRB1*03:01	0.00819672
A*03:01g~DRB1*11:01	0.0116279		A*11:01g~B*18:01g~C*05:01g	0.0116279		A*03:01g~C*02:02g~DQB1*06:01~DRB1*15:02	0.00819672
B*49:01g~C*07:01g	0.0116279		A*69:01~B*15:17~C*07:01g	0.0116279		A*02:01g~C*12:02g~DQB1*03:01~DRB1*04:08	0.00819672
B*15:10~C*08:04	0.0116279		A*29:02g~B*44:03~C*16:01g	0.0116279		A*68:01g~C*15:02g~DQB1*06:01~DRB1*15:02	0.00819672
B*58:01g~C*07:01g	0.0116279		A*68:01g~B*58:02~C*06:02g	0.0116279		A*03:01g~C*01:02g~DQB1*05:01~DRB1*01:01	0.00819672
B*07:05g~C*15:05g	0.0116279		A*02:01g~B*40:06~C*15:02g	0.0116279		A*01:01g~C*05:01g~DQB1*03:01~DRB1*04:01	0.00819672
B*51:01g~C*14:02g	0.0116279		A*01:01g~B*35:01g~C*04:01g	0.0116279		A*02:01g~C*07:04g~DQB1*03:02~DRB1*04:01	0.00819672
B*40:02g~C*02:02g	0.0116279		A*11:01g~B*52:01g~C*12:02g	0.0116279		A*68:01g~C*03:04g~DQB1*02:01~DRB1*04:04	0.00819672
B*35:08~C*12:03g	0.0116279		A*02:01g~B*58:01g~C*03:04g	0.0116279		A*68:02g~C*06:02g~DQB1*04:02~DRB1*03:01	0.00819672
B*44:03~C*16:01g	0.0116279		A*30:02g~B*14:01~C*08:02g	0.0116279		A*03:01g~C*04:01g~DQB1*03:19~DRB1*08:04	0.00819672
B*08:01g~C*07:02g	0.0116279		A*24:02g~B*15:01g~C*03:03g	0.0116279		A*33:03g~C*06:02g~DQB1*06:04~DRB1*13:01	0.00819672
B*15:01g~C*04:01g	0.0116279		A*30:01g~B*42:01~C*17:01g	0.0116279		A*03:01g~C*07:02g~DQB1*03:01~DRB1*01:01	0.00819672
B*15:16~C*14:02g	0.0116279		A*02:01g~B*58:01g~C*07:01g	0.0116273		A*33:03g~C*14:02g~DQB1*05:03~DRB1*11:17	0.00819672
B*13:02g~C*06:02g	0.0116279		A*30:01g~C*17:01g~DQB1*04:02	0.0115365		A*30:01g~C*06:02g~DQB1*02:02~DRB1*07:01	0.00819672
B*50:01g~C*06:02g	0.0116279		B*52:01g~C*12:02g~DRB1*14:04	0.0114233		A*11:01g~C*15:02g~DQB1*06:02~DRB1*15:01	0.00819672
B*53:01g~C*04:01g	0.0116279		A*24:02g~B*15:01g~DQB1*03:02	0.0107145		A*23:01g~C*04:01g~DQB1*02:02~DRB1*07:01	0.00819672
A*68:02g~DRB1*15:03	0.0113773		A*02:01g~B*15:01g~DQB1*03:02	0.010714		A*03:01g~C*03:04g~DQB1*06:09~DRB1*13:02	0.00819672
A*02:01g~C*12:03g	0.0113637		A*33:01g~B*14:02~DRB1*01:02	0.00974036		A*02:01g~C*06:02g~DQB1*03:01~DRB1*12:01	0.00819672
A*24:02g~C*07:01g	0.0113636		A*03:01g~B*07:02g~DRB1*11:01	0.00974036		A*02:05g~C*03:04g~DQB1*06:02~DRB1*15:03	0.00819672
A*30:02g~C*08:02g	0.0113636		A*68:02g~B*14:02~DRB1*13:03	0.00974036		A*02:01g~C*03:02g~DQB1*06:02~DRB1*11:01	0.00819672
A*68:02g~C*08:04	0.0113636		A*11:01g~B*51:01g~DRB1*15:01	0.00974036		A*11:01g~C*04:01g~DQB1*03:02~DRB1*04:01	0.00819672
A*69:01~C*12:03g	0.0113636		A*02:01g~B*07:02g~DRB1*15:01	0.00974036		A*02:01g~C*01:02g~DQB1*03:03~DRB1*13:01	0.00819672
A*02:01g~C*12:02g	0.0113636		A*02:01g~B*13:02g~DRB1*07:01	0.00974036		A*11:01g~C*07:02g~DQB1*06:01~DRB1*15:02	0.00819672
A*68:01g~C*07:04g	0.0113636		A*03:01g~B*07:02g~DRB1*01:01	0.00974036		A*01:01g~C*04:01g~DQB1*05:01~DRB1*01:01	0.00819672
A*24:07~C*07:02g	0.0113636		A*24:02g~DQB1*02:01~DRB1*03:01	0.00950656		A*24:02g~B*07:02g~C*07:02g~DQB1*02:01	0.0078125
A*69:01~C*07:01g	0.0113636		A*01:01g~DQB1*06:02~DRB1*15:01	0.00950656		A*68:01g~B*08:01g~C*07:02g~DQB1*02:01	0.0078125
A*29:02g~C*16:01g	0.0113636		A*02:01g~C*07:02g~DRB1*04:01	0.00949368		A*24:02g~B*15:32~C*12:03g~DQB1*03:01	0.0078125
A*11:01g~C*12:02g	0.0113636		B*14:02~C*08:02g~DQB1*06:02	0.00880981		A*23:01g~B*49:01g~C*07:01g~DQB1*05:03	0.0078125
A*02:01g~C*07:01g	0.011305		C*08:02g~DQB1*06:03~DRB1*13:01	0.00819677		A*25:01g~B*08:01g~C*07:01g~DQB1*02:01	0.0078125
A*02:01g~B*44:02g	0.0110498		C*07:02g~DQB1*05:03~DRB1*14:04	0.00819672		A*26:01g~B*58:01g~C*03:02g~DQB1*02:01	0.0078125
A*01:01g~B*57:01g	0.0110498		C*07:01g~DQB1*05:03~DRB1*15:01	0.00819672		A*30:02g~B*18:01g~C*05:01g~DQB1*06:02	0.0078125
A*30:01g~B*42:02	0.0110495		C*12:03g~DQB1*03:02~DRB1*04:02	0.00819672		A*24:02g~B*15:17~C*08:01g~DQB1*06:04	0.0078125
A*03:01g~B*51:01g	0.0110471		C*08:02g~DQB1*05:01~DRB1*01:02	0.00819672		A*11:01g~B*15:02g~C*07:01g~DQB1*03:01	0.0078125
A*11:01g~C*05:01g	0.0108186		C*15:02g~DQB1*03:03~DRB1*07:01	0.00819672		A*30:04g~B*15:03g~C*04:01g~DQB1*05:01	0.0078125
A*11:01g~B*18:01g	0.0107883		C*12:03g~DQB1*06:01~DRB1*15:01	0.00819672		A*23:01g~B*49:01g~C*07:01g~DQB1*03:01	0.0078125
A*11:01g~C*04:01g	0.0105895		C*12:03g~DQB1*03:01~DRB1*10:01	0.00819672		A*32:01g~B*40:06~C*15:02g~DQB1*05:01	0.0078125
B*35:01g~DRB1*01:01	0.0105289		C*02:02g~DQB1*06:01~DRB1*15:02	0.00819672		A*26:01g~B*81:01g~C*04:01g~DQB1*04:02	0.0078125
A*30:01g~DQB1*04:02	0.0104167		C*08:01g~DQB1*06:04~DRB1*12:02	0.00819672		A*30:02g~B*14:02~C*08:02g~DQB1*06:02	0.0078125
C*08:04~DRB1*11:01	0.0102846		C*07:01g~DQB1*03:01~DRB1*13:02	0.00819672		A*68:01g~B*44:02g~C*05:01g~DQB1*05:01	0.0078125
A*30:01g~DRB1*12:01	0.0101035		C*12:02g~DQB1*03:01~DRB1*04:08	0.00819672		A*68:02g~B*57:03~C*08:04~DQB1*06:02	0.0078125
C*05:01g~DRB1*13:01	0.010073		C*15:05g~DQB1*05:01~DRB1*11:04	0.00819672		A*33:01g~B*14:02~C*08:02g~DQB1*05:01	0.0078125
B*15:10~DRB1*11:01	0.0100395		C*07:01g~DQB1*03:19~DRB1*11:02	0.00819672		A*24:07~B*15:01g~C*07:02g~DQB1*02:01	0.0078125
A*29:02g~B*44:03	0.00978813		C*04:01g~DQB1*05:01~DRB1*11:04	0.00819672		A*02:11g~B*08:01g~C*01:02g~DQB1*05:03	0.0078125
A*68:01g~B*58:02	0.00966859		C*03:02g~DQB1*06:02~DRB1*15:03	0.00819672		A*24:02g~B*15:01g~C*03:03g~DQB1*03:02	0.0078125
A*02:01g~B*15:01g	0.0096264		C*07:04g~DQB1*04:02~DRB1*08:01	0.00819672		A*32:01g~B*41:01~C*17:01g~DQB1*03:03	0.0078125
A*24:02g~B*15:01g	0.0094493		C*07:04g~DQB1*03:02~DRB1*04:01	0.00819672		A*24:02g~B*07:02g~C*07:02g~DQB1*02:02	0.0078125
C*07:02g~DQB1*05:01	0.00927908		C*08:04~DQB1*05:01~DRB1*01:02	0.00819672		A*31:01g~B*27:05g~C*07:04g~DQB1*04:02	0.0078125
A*02:05g~B*58:01g	0.00901564		C*03:04g~DQB1*06:04~DRB1*13:02	0.00819672		A*26:01g~B*15:01g~C*03:03g~DQB1*03:02	0.0078125
B*14:01~DRB1*07:01	0.00901167		C*18:01g~DQB1*03:19~DRB1*11:02	0.00819672		A*24:02g~B*07:05g~C*07:02g~DQB1*05:03	0.0078125
A*66:01g~B*58:02	0.00897797		C*14:02g~DQB1*05:01~DRB1*15:02	0.00819672		A*30:02g~B*42:01~C*17:01g~DQB1*04:02	0.0078125
C*05:01g~DRB1*03:01	0.00891436		C*07:02g~DQB1*03:01~DRB1*01:01	0.00819672		A*24:02g~B*35:03g~C*04:01g~DQB1*03:02	0.0078125
A*68:01g~DRB1*03:01	0.00889118		C*16:01g~DQB1*05:01~DRB1*01:02	0.00819672		A*68:02g~B*45:01g~C*03:04g~DQB1*06:09	0.0078125
A*02:01g~DRB1*01:01	0.00886881		C*15:02g~DQB1*06:02~DRB1*15:01	0.00819672		A*30:02g~B*15:10~C*16:01g~DQB1*05:01	0.0078125
B*07:02g~DRB1*11:01	0.00878797		C*04:01g~DQB1*04:02~DRB1*15:03	0.00819672		A*03:01g~B*15:24~C*03:03g~DQB1*03:01	0.0078125
B*58:02~DRB1*13:01	0.00875689		C*08:02g~DQB1*06:02~DRB1*08:04	0.00819672		A*32:01g~B*15:01g~C*04:01g~DQB1*03:02	0.0078125
B*44:02g~DRB1*01:01	0.00872097		C*03:02g~DQB1*06:02~DRB1*11:01	0.00819672		A*24:02g~B*07:05g~C*15:05g~DQB1*03:01	0.0078125
B*50:01g~DRB1*07:01	0.00872097		C*04:01g~DQB1*03:02~DRB1*04:03	0.00819672		A*01:01g~B*35:03g~C*12:03g~DQB1*03:03	0.0078125
B*14:02~DRB1*13:03	0.00872097		C*12:03g~DQB1*05:03~DRB1*14:54	0.00819672		A*02:01g~B*58:01g~C*07:01g~DQB1*03:19	0.0078125
B*18:01g~DRB1*11:04	0.00872097		C*03:03g~DQB1*03:02~DRB1*04:04	0.00819672		A*02:05g~B*44:02g~C*05:01g~DQB1*05:01	0.0078125
A*24:02g~DRB1*04:04	0.00872095		C*15:02g~DQB1*05:01~DRB1*04:05	0.00819672		A*31:01g~B*15:01g~C*03:03g~DQB1*06:02	0.0078125
A*24:07~DRB1*12:02	0.00872095		C*07:02g~DQB1*04:02~DRB1*10:01	0.00819672		A*29:02g~B*07:02g~C*07:02g~DQB1*06:03	0.0078125
A*33:01g~DRB1*01:02	0.00872095		C*12:02g~DQB1*06:01~DRB1*15:01	0.00819672		A*30:01g~B*50:01g~C*06:02g~DQB1*02:02	0.0078125
A*31:01g~DRB1*15:01	0.00872095		C*07:26~DQB1*04:02~DRB1*04:10	0.00819672		A*36:01~B*53:01g~C*04:01g~DQB1*05:01	0.0078125
A*68:02g~DRB1*13:03	0.00872095		C*06:02g~DQB1*03:02~DRB1*04:05	0.00819672		A*26:01g~B*51:01g~C*14:02g~DQB1*03:01	0.0078125
A*11:01g~DRB1*04:01	0.00872095		C*04:01g~DQB1*05:01~DRB1*12:01	0.00819672		A*02:01g~B*38:01~C*12:03g~DQB1*06:03	0.0078125
A*69:01~DRB1*11:01	0.00872095		C*06:02g~DQB1*06:04~DRB1*08:04	0.00819672		A*11:01g~B*18:01g~C*05:01g~DQB1*06:03	0.0078125
C*06:02g~DQB1*04:02	0.00865385		C*04:01g~DQB1*03:19~DRB1*13:01	0.00819672		A*26:01g~B*40:01g~C*03:04g~DQB1*06:04	0.0078125
A*74:01g~B*15:03g	0.00858872		C*06:02g~DQB1*05:01~DRB1*01:02	0.00819672		A*32:01g~B*38:01~C*15:05g~DQB1*05:01	0.0078125
A*11:01g~DRB1*15:02	0.00846548		C*04:01g~DQB1*02:02~DRB1*09:01	0.00819672		A*02:01g~B*07:05g~C*12:03g~DQB1*03:01	0.0078125
B*58:01g~DRB1*15:03	0.0083576		C*06:02g~DQB1*02:01~DRB1*04:04	0.00819672		A*02:01g~B*07:05g~C*07:26~DQB1*03:02	0.0078125
A*31:01g~B*27:05g	0.00828736		C*03:04g~DQB1*04:02~DRB1*03:01	0.00819672		A*01:01g~B*27:05g~C*05:01g~DQB1*03:01	0.0078125
A*24:07~B*35:05	0.00828736		C*03:04g~DQB1*03:01~DRB1*15:03	0.00819672		A*03:01g~B*44:02g~C*01:02g~DQB1*05:01	0.0078125
A*02:11g~B*40:06	0.00828736		C*06:02g~DQB1*06:02~DRB1*12:01	0.00819672		A*03:01g~B*57:01g~C*06:02g~DQB1*03:03	0.0078125
A*02:01g~B*52:01g	0.00828736		C*14:02g~DQB1*05:03~DRB1*11:17	0.00819672		A*30:01g~B*58:02~C*04:01g~DQB1*05:01	0.0078125
A*11:01g~B*51:01g	0.00828736		C*07:02g~DQB1*03:03~DRB1*13:01	0.00819672		A*68:01g~B*35:01g~C*06:02g~DQB1*03:02	0.0078125
A*01:01g~B*35:01g	0.00828736		C*14:02g~DQB1*03:01~DRB1*08:03	0.00819672		A*29:02g~B*44:03~C*16:01g~DQB1*02:02	0.0078125
A*11:01g~B*35:01g	0.00828736		C*04:01g~DQB1*02:02~DRB1*07:01	0.00819672		A*30:01g~B*13:02g~C*06:02g~DQB1*02:02	0.0078125
A*30:02g~B*42:01	0.00828736		C*07:02g~DQB1*06:01~DRB1*15:02	0.00819672		A*23:01g~B*44:03~C*04:01g~DQB1*02:02	0.0078125
A*68:02g~B*14:02	0.00822976		C*06:02g~DQB1*02:02~DRB1*07:01	0.00819672		A*68:01g~B*40:06~C*15:02g~DQB1*06:01	0.0078125
B*40:06~DRB1*15:02	0.00802096		C*01:02g~DQB1*05:03~DRB1*14:04	0.00819672		A*33:03g~B*15:16~C*14:02g~DQB1*05:03	0.0078125
B*14:02~DQB1*06:02	0.00798326		C*12:03g~DQB1*03:01~DRB1*12:02	0.00819672		A*03:01g~B*58:02~C*04:01g~DQB1*03:19	0.0078125
A*02:11g~DRB1*15:02	0.00795033		C*08:02g~DQB1*05:03~DRB1*14:01	0.00819668		A*03:01g~B*27:05g~C*02:02g~DQB1*03:01	0.0078125
A*24:02g~DRB1*15:01	0.0079138		C*01:02g~DQB1*03:01~DRB1*04:01	0.0081951		A*02:01g~B*15:18g~C*07:04g~DQB1*03:02	0.0078125
A*03:01g~B*27:05g	0.00791181		B*52:01g~C*12:02g~DRB1*15:02	0.00805718		A*33:03g~B*53:01g~C*06:02g~DQB1*06:04	0.0078125
A*02:01g~B*35:01g	0.0079115		B*40:06~C*15:02g~DRB1*14:04	0.00805718		A*68:02g~B*15:10~C*03:04g~DQB1*04:02	0.0078125
C*04:01g~DQB1*06:02	0.00780843		B*15:32~C*12:03g~DQB1*03:01	0.0078125		A*68:01g~B*58:02~C*06:02g~DQB1*02:01	0.0078125
A*03:01g~C*01:02g	0.00776809		B*49:01g~C*07:01g~DQB1*05:03	0.0078125		A*02:05g~B*44:02g~C*06:02g~DQB1*03:01	0.0078125
B*35:01g~DRB1*11:01	0.00775197		B*14:02~C*08:02g~DQB1*05:01	0.0078125		A*11:01g~B*51:01g~C*15:02g~DQB1*06:02	0.0078125
A*01:01g~DRB1*15:01	0.00771165		B*58:01g~C*07:01g~DQB1*03:19	0.0078125		A*03:01g~B*15:10~C*03:02g~DQB1*06:09	0.0078125
C*07:01g~DQB1*05:03	0.00769231		B*38:01~C*12:03g~DQB1*05:01	0.0078125		A*02:01g~B*51:01g~C*01:02g~DQB1*03:03	0.0078125
C*12:03g~DQB1*03:03	0.00769231		B*27:05g~C*07:04g~DQB1*04:02	0.0078125		A*11:01g~B*35:01g~C*04:01g~DQB1*03:02	0.0078125
C*08:02g~DQB1*05:01	0.00769231		B*15:02g~C*08:01g~DQB1*06:04	0.0078125		A*11:01g~B*18:01g~C*07:02g~DQB1*06:01	0.0078125
C*08:01g~DQB1*06:04	0.00769231		B*27:05g~C*02:02g~DQB1*03:01	0.0078125		A*68:01g~B*08:01g~C*07:01g~DQB1*02:01	0.0078125
C*02:02g~DQB1*03:01	0.00769231		B*27:05g~C*01:02g~DQB1*03:01	0.0078125		A*11:01g~B*56:01g~C*01:02g~DQB1*05:01	0.0078125
C*15:05g~DQB1*05:01	0.00769231		B*35:03g~C*12:03g~DQB1*03:03	0.0078125		A*68:02g~B*15:16~C*18:01g~DQB1*03:19	0.0078125
C*07:01g~DQB1*03:19	0.00769231		B*15:03g~C*07:01g~DQB1*05:01	0.0078125		A*43:01~B*81:01g~C*14:02g~DQB1*05:01	0.0078125
C*05:01g~DQB1*02:01	0.00769231		B*49:01g~C*04:01g~DQB1*03:01	0.0078125		A*03:01g~B*44:03~C*04:01g~DRB1*15:01	0.00764367
C*12:03g~DQB1*05:03	0.00769231		B*57:03~C*08:04~DQB1*05:01	0.0078125		A*23:01g~B*07:02g~C*07:02g~DRB1*07:01	0.00764367
C*07:04g~DQB1*04:02	0.00769231		B*15:18g~C*07:04g~DQB1*03:02	0.0078125		A*24:02g~B*07:02g~DQB1*02:01~DRB1*03:01	0.00757576
C*07:04g~DQB1*03:02	0.00769231		B*40:01g~C*03:04g~DQB1*06:04	0.0078125		A*24:02g~B*40:06~DQB1*04:02~DRB1*04:05	0.00757576
C*03:04g~DQB1*06:04	0.00769231		B*51:01g~C*15:02g~DQB1*06:02	0.0078125		A*32:01g~B*07:02g~DQB1*05:01~DRB1*10:01	0.00757576
C*08:04~DQB1*05:01	0.00769231		B*15:01g~C*04:01g~DQB1*03:02	0.0078125		A*02:01g~B*52:01g~DQB1*05:03~DRB1*15:01	0.00757576
C*05:01g~DQB1*03:01	0.00769231		B*81:01g~C*18:01g~DQB1*03:19	0.0078125		A*24:02g~B*07:05g~DQB1*06:01~DRB1*14:04	0.00757576
C*14:02g~DQB1*05:01	0.00769231		B*15:16~C*14:02g~DQB1*05:01	0.0078125		A*24:07~B*15:01g~DQB1*02:01~DRB1*03:01	0.00757576
C*18:01g~DQB1*03:19	0.00769231		B*51:01g~C*01:02g~DQB1*03:03	0.0078125		A*02:11g~B*08:01g~DQB1*05:03~DRB1*14:04	0.00757576
C*16:01g~DQB1*05:01	0.00769231		B*15:01g~C*01:02g~DQB1*05:03	0.0078125		A*26:01g~B*51:01g~DQB1*03:01~DRB1*08:03	0.00757576
C*15:05g~DQB1*03:01	0.00769231		B*45:01g~C*16:01g~DQB1*05:01	0.0078125		A*26:01g~B*14:02~DQB1*06:02~DRB1*15:03	0.00757576
C*15:02g~DQB1*06:02	0.00769231		B*51:01g~C*14:02g~DQB1*03:01	0.0078125		A*30:02g~B*81:01g~DQB1*04:02~DRB1*08:04	0.00757576
C*05:01g~DQB1*06:03	0.00769231		B*44:03~C*16:01g~DQB1*02:02	0.0078125		A*30:02g~B*58:01g~DQB1*06:02~DRB1*15:03	0.00757576
C*01:02g~DQB1*05:03	0.00769231		B*15:24~C*03:03g~DQB1*03:01	0.0078125		A*26:01g~B*18:01g~DQB1*02:01~DRB1*03:01	0.00757576
C*15:02g~DQB1*04:02	0.00769231		B*35:03g~C*04:01g~DQB1*03:02	0.0078125		A*29:02g~B*15:01g~DQB1*06:02~DRB1*13:01	0.00757576
C*07:26~DQB1*04:02	0.00769231		B*40:06~C*15:02g~DQB1*04:02	0.0078125		A*24:02g~B*15:32~DQB1*03:01~DRB1*12:02	0.00757576
C*06:02g~DQB1*03:02	0.00769231		B*81:01g~C*04:01g~DQB1*04:02	0.0078125		A*31:01g~B*07:02g~DQB1*06:03~DRB1*15:01	0.00757576
C*04:01g~DQB1*06:04	0.00769231		B*41:01~C*17:01g~DQB1*03:03	0.0078125		A*30:02g~B*45:01g~DQB1*06:09~DRB1*13:02	0.00757576
C*06:02g~DQB1*03:19	0.00769231		B*07:02g~C*07:02g~DQB1*02:02	0.0078125		A*30:01g~B*13:02g~DQB1*02:02~DRB1*07:01	0.00757576
C*03:04g~DQB1*02:01	0.00769231		B*58:01g~C*03:04g~DQB1*06:02	0.0078125		A*23:01g~B*49:01g~DQB1*05:03~DRB1*15:02	0.00757576
C*06:02g~DQB1*06:02	0.00769231		B*44:02g~C*06:02g~DQB1*03:01	0.0078125		A*69:01~B*35:08~DQB1*05:03~DRB1*14:01	0.00757576
C*03:04g~DQB1*03:01	0.00769231		B*07:05g~C*07:26~DQB1*04:02	0.0078125		A*24:02g~B*15:17~DQB1*06:04~DRB1*12:02	0.00757576
C*14:02g~DQB1*05:03	0.00769231		B*44:03~C*04:01g~DQB1*02:02	0.0078125		A*11:01g~B*15:02g~DQB1*03:01~DRB1*13:02	0.00757576
C*14:02g~DQB1*03:01	0.00769231		B*07:02g~C*07:02g~DQB1*06:03	0.0078125		A*24:02g~B*07:05g~DQB1*04:02~DRB1*04:10	0.00757576
C*04:01g~DQB1*02:02	0.00769231		B*53:01g~C*04:01g~DQB1*02:02	0.0078125		A*02:01g~B*07:02g~DQB1*03:02~DRB1*04:01	0.00757576
C*07:02g~DQB1*06:01	0.00769231		B*50:01g~C*06:02g~DQB1*05:01	0.0078125		A*32:01g~B*15:01g~DQB1*03:02~DRB1*04:03	0.00757576
C*16:01g~DQB1*03:03	0.00769231		B*15:16~C*14:02g~DQB1*05:03	0.0078125		A*11:01g~B*18:01g~DQB1*06:03~DRB1*13:01	0.00757576
B*07:02g~DRB1*01:01	0.00753332		B*53:01g~C*06:02g~DQB1*03:19	0.0078125		A*29:02g~B*42:02~DQB1*06:09~DRB1*13:02	0.00757576
A*30:02g~DRB1*01:02	0.00750971		B*58:02~C*04:01g~DQB1*06:04	0.0078125		A*23:01g~B*15:03g~DQB1*03:01~DRB1*11:04	0.00757576
B*51:01g~C*02:02g	0.0074268		B*07:05g~C*07:02g~DQB1*05:03	0.0078125		A*02:02~B*57:03~DQB1*06:02~DRB1*11:01	0.00757576
B*27:05g~C*01:02g	0.0074268		B*56:01g~C*01:02g~DQB1*05:01	0.0078125		A*68:02g~B*81:01g~DQB1*05:01~DRB1*15:02	0.00757576
C*12:02g~DRB1*15:02	0.00735428		B*58:02~C*03:04g~DQB1*02:01	0.0078125		A*43:01~B*15:16~DQB1*03:19~DRB1*11:02	0.00757576
C*15:02g~DRB1*14:04	0.00735428		B*13:02g~C*06:02g~DQB1*02:02	0.0078125		A*30:02g~B*42:01~DQB1*04:02~DRB1*03:02	0.00757576
DQB1*05:01~DRB1*04:05	0.00735375		B*15:10~C*06:02g~DQB1*04:02	0.0078125		A*23:01g~B*44:03~DQB1*02:02~DRB1*07:01	0.00757576
DQB1*06:04~DRB1*13:01	0.00735295		B*58:02~C*06:02g~DQB1*03:02	0.0078125		A*68:01g~B*27:05g~DQB1*05:01~DRB1*08:01	0.00757576
DQB1*05:01~DRB1*15:02	0.00735295		B*18:01g~C*07:02g~DQB1*06:01	0.0078125		A*31:01g~B*44:02g~DQB1*04:02~DRB1*01:01	0.00757576
DQB1*05:01~DRB1*11:04	0.00735295		B*38:01~C*12:03g~DQB1*06:03	0.00780955		A*30:04g~B*49:01g~DQB1*05:01~DRB1*11:01	0.00757576
DQB1*03:03~DRB1*13:01	0.00735295		A*68:02g~C*17:01g~DQB1*02:02	0.00769431		A*68:01g~B*58:02~DQB1*03:02~DRB1*12:01	0.00757576
DQB1*04:02~DRB1*08:01	0.00735295		A*11:01g~C*03:03g~DQB1*06:03	0.00769231		A*30:01g~B*35:01g~DQB1*05:01~DRB1*04:05	0.00757576
DQB1*03:01~DRB1*08:03	0.00735295		A*30:01g~C*04:01g~DQB1*05:01	0.00769231		A*33:03g~B*35:08~DQB1*03:01~DRB1*14:04	0.00757576
DQB1*03:02~DRB1*04:02	0.00735295		A*26:01g~C*03:02g~DQB1*02:01	0.00769231		A*25:01g~B*08:01g~DQB1*02:01~DRB1*03:01	0.00757576
DQB1*03:01~DRB1*12:01	0.00735295		A*30:02g~C*05:01g~DQB1*06:02	0.00769231		A*24:03g~B*35:03g~DQB1*05:03~DRB1*11:04	0.00757576
DQB1*05:03~DRB1*14:01	0.00735295		A*23:01g~C*07:01g~DQB1*05:03	0.00769231		A*33:03g~B*15:16~DQB1*05:03~DRB1*11:17	0.00757576
DQB1*04:02~DRB1*04:10	0.00735295		A*24:02g~C*07:01g~DQB1*03:01	0.00769231		A*36:01~B*50:01g~DQB1*02:02~DRB1*09:01	0.00757576
DQB1*04:02~DRB1*04:04	0.00735295		A*11:01g~C*08:01g~DQB1*06:04	0.00769231		A*30:01g~B*53:01g~DQB1*05:01~DRB1*01:02	0.00757576
DQB1*05:03~DRB1*14:54	0.00735295		A*23:01g~C*04:01g~DQB1*03:01	0.00769231		A*33:01g~B*14:02~DQB1*05:01~DRB1*01:02	0.00757576
DQB1*04:02~DRB1*08:04	0.00735295		A*30:04g~C*07:01g~DQB1*05:01	0.00769231		A*69:01~B*35:08~DQB1*05:03~DRB1*14:54	0.00757576
DQB1*03:02~DRB1*12:01	0.00735295		A*25:01g~C*07:01g~DQB1*02:01	0.00769231		A*68:02g~B*15:10~DQB1*02:01~DRB1*04:04	0.00757576
DQB1*03:01~DRB1*01:01	0.00735295		A*02:02~C*08:04~DQB1*05:01	0.00769231		A*68:01g~B*58:02~DQB1*04:02~DRB1*03:01	0.00757576
DQB1*03:01~DRB1*04:01	0.00735295		A*26:01g~C*04:01g~DQB1*06:02	0.00769231		A*33:03g~B*53:01g~DQB1*06:04~DRB1*13:01	0.00757576
DQB1*05:03~DRB1*11:17	0.00735295		A*24:02g~C*07:02g~DQB1*05:03	0.00769231		A*03:01g~B*58:02~DQB1*03:19~DRB1*08:04	0.00757576
DQB1*02:02~DRB1*09:01	0.00735295		A*01:01g~C*12:03g~DQB1*03:03	0.00769231		A*02:01g~B*15:01g~DQB1*03:02~DRB1*04:02	0.00757576
DQB1*03:01~DRB1*04:08	0.00735295		A*33:01g~C*08:02g~DQB1*05:01	0.00769231		A*01:01g~B*42:01~DQB1*04:02~DRB1*03:02	0.00757576
DQB1*03:19~DRB1*08:04	0.00735295		A*32:01g~C*15:02g~DQB1*05:01	0.00769231		A*02:05g~B*44:02g~DQB1*03:19~DRB1*11:02	0.00757576
DQB1*05:03~DRB1*15:01	0.00735295		A*68:02g~C*16:01g~DQB1*05:01	0.00769231		A*02:01g~B*58:01g~DQB1*06:02~DRB1*15:03	0.00757576
DQB1*04:02~DRB1*04:05	0.00735214		A*30:02g~C*03:04g~DQB1*06:09	0.00769231		A*02:05g~B*44:02g~DQB1*03:01~DRB1*12:01	0.00757576
B*44:03~DRB1*15:03	0.00731204		A*26:01g~C*03:03g~DQB1*03:02	0.00769231		A*02:01g~B*58:01g~DQB1*05:01~DRB1*01:01	0.00757576
B*14:02~DRB1*15:03	0.00726748		A*24:02g~C*15:05g~DQB1*03:01	0.00769231		A*26:01g~B*38:01~DQB1*06:03~DRB1*13:01	0.00757576
A*11:01g~C*07:02g	0.00723128		A*68:01g~C*05:01g~DQB1*05:01	0.00769231		A*66:02~B*41:01~DQB1*02:02~DRB1*07:01	0.00757576
A*02:01g~B*07:05g	0.00716281		A*31:01g~C*07:04g~DQB1*04:02	0.00769231		A*02:01g~B*51:01g~DQB1*03:03~DRB1*13:01	0.00757576
A*02:01g~B*58:01g	0.00715607		A*43:01~C*14:02g~DQB1*05:01	0.00769231		A*01:01g~B*35:03g~DQB1*03:03~DRB1*07:01	0.00757576
B*15:10~DQB1*05:01	0.00714362		A*68:02g~C*18:01g~DQB1*03:19	0.00769231		A*03:01g~B*07:02g~DQB1*03:01~DRB1*01:01	0.00757576
B*07:02g~DQB1*03:03	0.00714287		A*32:01g~C*17:01g~DQB1*03:03	0.00769231		A*02:01g~B*40:01g~DQB1*06:04~DRB1*13:02	0.00757576
B*44:02g~DQB1*03:01	0.00714286		A*24:02g~C*07:02g~DQB1*02:02	0.00769231		A*01:01g~B*44:02g~DQB1*03:01~DRB1*04:01	0.00757576
B*51:01g~DQB1*03:01	0.00714286		A*32:01g~C*04:01g~DQB1*03:02	0.00769231		A*03:01g~B*27:05g~DQB1*05:01~DRB1*01:01	0.00757576
B*13:02g~DQB1*02:02	0.00714286		A*02:01g~C*12:03g~DQB1*06:03	0.00769231		A*11:01g~B*35:01g~DQB1*03:02~DRB1*04:01	0.00757576
B*15:01g~DQB1*05:03	0.00714286		A*11:01g~C*05:01g~DQB1*06:03	0.00769231		A*02:01g~B*38:01~DQB1*05:01~DRB1*10:01	0.00757576
B*58:01g~DQB1*03:19	0.00714286		A*24:02g~C*07:02g~DQB1*02:01	0.00769231		A*32:01g~B*07:05g~DQB1*03:01~DRB1*11:04	0.00757576
B*15:16~DQB1*05:03	0.00714286		A*24:07~C*01:02g~DQB1*05:03	0.00769231		A*02:01g~B*40:06~DQB1*03:02~DRB1*04:01	0.00757576
B*56:01g~DQB1*05:01	0.00714286		A*02:11g~C*07:02g~DQB1*02:01	0.00769231		A*68:01g~B*15:18g~DQB1*06:01~DRB1*15:02	0.00757576
B*07:05g~DQB1*04:02	0.00714286		A*26:01g~C*03:04g~DQB1*06:04	0.00769231		A*02:01g~B*58:01g~DQB1*06:02~DRB1*13:02	0.00757576
B*40:06~DQB1*04:02	0.00714286		A*02:01g~C*07:01g~DQB1*03:19	0.00769231		A*03:01g~B*15:10~DQB1*06:09~DRB1*11:01	0.00757576
B*27:05g~DQB1*04:02	0.00714286		A*02:05g~C*05:01g~DQB1*05:01	0.00769231		A*01:01g~B*35:01g~DQB1*05:01~DRB1*01:01	0.00757576
B*53:01g~DQB1*02:02	0.00714286		A*68:01g~C*06:02g~DQB1*03:02	0.00769231		A*03:01g~B*27:05g~DQB1*06:01~DRB1*15:02	0.00757576
B*15:32~DQB1*03:01	0.00714286		A*32:01g~C*12:03g~DQB1*03:01	0.00769231		A*02:01g~B*52:01g~DQB1*03:01~DRB1*04:08	0.00757576
B*14:02~DQB1*05:01	0.00714286		A*31:01g~C*07:02g~DQB1*06:02	0.00769231		A*11:01g~B*18:01g~DQB1*06:01~DRB1*15:02	0.00757576
B*50:01g~DQB1*05:01	0.00714286		A*29:02g~C*03:03g~DQB1*06:03	0.00769231		A*11:01g~B*56:01g~DQB1*05:01~DRB1*01:01	0.00757576
B*38:01~DQB1*05:01	0.00714286		A*02:01g~C*15:05g~DQB1*05:01	0.00769231		A*68:02g~B*15:10~C*03:04g~DRB1*03:01	0.00685426
B*53:01g~DQB1*06:04	0.00714286		A*02:01g~C*07:26~DQB1*03:02	0.00769231		A*02:11g~B*40:06~C*15:02g~DRB1*15:01	0.00649447
B*58:02~DQB1*03:19	0.00714286		A*68:01g~C*07:02g~DQB1*02:01	0.00769231		A*68:02g~B*14:01~C*08:02g~DRB1*07:01	0.00649351
B*15:18g~DQB1*03:02	0.00714286		A*26:01g~C*14:02g~DQB1*03:01	0.00769231		A*24:02g~B*15:32~C*12:03g~DRB1*12:02	0.00649351
B*15:16~DQB1*03:19	0.00714286		A*29:02g~C*16:01g~DQB1*03:03	0.00769231		A*25:01g~B*08:01g~C*07:01g~DRB1*03:01	0.00649351
B*81:01g~DQB1*05:01	0.00714286		A*03:01g~C*06:02g~DQB1*02:02	0.00769231		A*26:01g~B*18:01g~C*05:01g~DRB1*15:03	0.00649351
B*07:05g~DQB1*05:03	0.00714286		A*68:01g~C*07:01g~DQB1*02:01	0.00769231		A*30:02g~B*58:01g~C*03:02g~DRB1*03:01	0.00649351
B*49:01g~DQB1*05:03	0.00714286		A*03:01g~C*02:02g~DQB1*03:01	0.00769231		A*11:01g~B*15:17~C*07:01g~DRB1*13:02	0.00649351
B*58:02~DQB1*04:02	0.00714286		A*68:01g~C*15:02g~DQB1*03:02	0.00769231		A*24:02g~B*15:02g~C*08:01g~DRB1*12:02	0.00649351
B*15:10~DQB1*02:01	0.00714286		A*68:02g~C*03:04g~DQB1*02:01	0.00769231		A*69:01~B*35:08~C*12:03g~DRB1*14:01	0.00649351
B*07:02g~DQB1*06:03	0.00714286		A*68:01g~C*06:02g~DQB1*04:02	0.00769231		A*24:02g~B*18:01g~C*02:02g~DRB1*13:03	0.00649351
B*81:01g~DQB1*04:02	0.00714286		A*02:01g~C*07:04g~DQB1*06:01	0.00769231		A*02:01g~B*27:05g~C*07:01g~DRB1*11:04	0.00649351
B*15:02g~DQB1*06:04	0.00714286		A*01:01g~C*05:01g~DQB1*03:01	0.00769231		A*03:01g~B*15:01g~C*03:04g~DRB1*15:01	0.00649351
B*42:02~DQB1*06:09	0.00714286		A*03:01g~C*04:01g~DQB1*06:04	0.00769231		A*24:02g~B*51:01g~C*14:02g~DRB1*04:01	0.00649351
B*40:01g~DQB1*06:04	0.00714286		A*33:03g~C*06:02g~DQB1*03:19	0.00769231		A*32:01g~B*40:06~C*07:02g~DRB1*04:05	0.00649351
B*58:02~DQB1*03:02	0.00714286		A*33:03g~C*14:02g~DQB1*05:03	0.00769231		A*24:02g~B*07:02g~C*15:02g~DRB1*10:01	0.00649351
B*57:03~DQB1*06:02	0.00714286		A*23:01g~C*04:01g~DQB1*02:02	0.00769231		A*23:01g~B*49:01g~C*07:01g~DRB1*11:04	0.00649351
B*49:01g~DQB1*05:01	0.00714286		A*11:01g~C*15:02g~DQB1*06:02	0.00769231		A*30:04g~B*15:03g~C*04:01g~DRB1*11:01	0.00649351
B*15:03g~DQB1*03:01	0.00714286		A*03:01g~C*03:02g~DQB1*06:09	0.00769231		A*24:02g~B*15:01g~C*03:03g~DRB1*04:04	0.00649351
B*15:24~DQB1*03:02	0.00714286		A*02:05g~C*06:02g~DQB1*03:01	0.00769231		A*33:01g~B*14:02~C*08:02g~DRB1*01:02	0.00649351
B*35:03g~DQB1*03:03	0.00714286		A*11:01g~C*07:02g~DQB1*05:01	0.00769231		A*02:01g~B*15:01g~C*03:03g~DRB1*04:02	0.00649351
B*18:01g~DQB1*06:01	0.00714286		A*02:01g~C*07:02g~DQB1*03:03	0.00769231		A*26:01g~B*81:01g~C*08:02g~DRB1*08:04	0.00649351
B*38:01~DQB1*06:03	0.00714286		A*11:01g~C*07:02g~DQB1*06:01	0.00769231		A*30:02g~B*14:02~C*04:01g~DRB1*15:03	0.00649351
B*51:01g~DQB1*03:03	0.00714285		A*11:01g~C*01:02g~DQB1*05:01	0.00769231		A*02:11g~B*08:01g~C*07:02g~DRB1*03:01	0.00649351
B*45:01g~DQB1*05:01	0.0071421		A*36:01~C*04:01g~DQB1*05:01	0.00769231		A*24:07~B*15:01g~C*01:02g~DRB1*14:04	0.00649351
A*33:03g~B*15:16	0.00713634		A*11:01g~C*12:03g~DQB1*06:03	0.00769231		A*31:01g~B*27:05g~C*05:01g~DRB1*01:01	0.00649351
B*07:02g~DRB1*15:03	0.00709839		A*24:02g~C*03:03g~DQB1*03:02	0.00769127		A*68:01g~B*44:02g~C*07:04g~DRB1*08:01	0.00649351
A*02:05g~DRB1*11:02	0.00705548		A*68:02g~C*08:02g~DQB1*02:02	0.00769031		A*24:02g~B*07:05g~C*07:02g~DRB1*15:01	0.00649351
A*24:02g~DQB1*05:03	0.00694444		B*40:06~DQB1*06:01~DRB1*15:01	0.00757633		A*23:01g~B*57:03~C*18:01g~DRB1*13:01	0.00649351
A*32:01g~DQB1*05:01	0.00694444		B*15:10~DQB1*06:09~DRB1*13:02	0.00757583		A*68:02g~B*15:10~C*03:04g~DRB1*01:02	0.00649351
A*30:02g~DQB1*02:01	0.00694444		B*51:01g~DQB1*03:03~DRB1*13:01	0.00757576		A*24:02g~B*37:01g~C*05:01g~DRB1*11:01	0.00649351
A*30:02g~DQB1*04:02	0.00694444		B*07:02g~DQB1*05:01~DRB1*01:01	0.00757576		A*02:01g~B*44:02g~C*06:02g~DRB1*04:01	0.00649351
A*24:02g~DQB1*03:03	0.00694444		B*51:01g~DQB1*03:01~DRB1*08:03	0.00757576		A*30:02g~B*45:01g~C*16:01g~DRB1*13:02	0.00649351
A*32:01g~DQB1*02:02	0.00694444		B*44:03~DQB1*02:02~DRB1*07:01	0.00757576		A*43:01~B*15:16~C*18:01g~DRB1*11:02	0.00649351
A*36:01~DQB1*05:01	0.00694444		B*07:02g~DQB1*03:01~DRB1*01:01	0.00757576		A*68:02g~B*81:01g~C*14:02g~DRB1*15:02	0.00649351
A*02:11g~DQB1*05:03	0.00694444		B*13:02g~DQB1*02:02~DRB1*07:01	0.00757576		A*29:02g~B*07:02g~C*07:02g~DRB1*13:01	0.00649351
A*24:07~DQB1*02:01	0.00694444		B*58:01g~DQB1*03:19~DRB1*11:02	0.00757576		A*02:05g~B*44:02g~C*07:01g~DRB1*01:01	0.00649351
A*30:02g~DQB1*02:02	0.00694444		B*15:01g~DQB1*05:03~DRB1*14:04	0.00757576		A*02:01g~B*58:01g~C*05:01g~DRB1*11:02	0.00649351
A*30:02g~DQB1*06:09	0.00694444		B*44:02g~DQB1*03:01~DRB1*12:01	0.00757576		A*32:01g~B*15:01g~C*04:01g~DRB1*04:03	0.00649351
A*24:03g~DQB1*03:01	0.00694444		B*07:05g~DQB1*04:02~DRB1*04:10	0.00757576		A*26:01g~B*51:01g~C*14:02g~DRB1*08:03	0.00649351
A*11:01g~DQB1*06:04	0.00694444		B*15:16~DQB1*05:03~DRB1*11:17	0.00757576		A*68:01g~B*08:01g~C*07:02g~DRB1*03:01	0.00649351
A*29:02g~DQB1*06:09	0.00694444		B*27:05g~DQB1*03:01~DRB1*04:01	0.00757576		A*01:01g~B*35:03g~C*12:03g~DRB1*07:01	0.00649351
A*24:02g~DQB1*02:01	0.00694444		B*56:01g~DQB1*05:01~DRB1*01:01	0.00757576		A*31:01g~B*15:01g~C*03:03g~DRB1*15:01	0.00649351
A*23:01g~DQB1*05:03	0.00694444		B*07:02g~DQB1*04:02~DRB1*10:01	0.00757576		A*30:01g~B*53:01g~C*06:02g~DRB1*09:01	0.00649351
A*43:01~DQB1*03:19	0.00694444		B*40:06~DQB1*05:01~DRB1*04:05	0.00757576		A*36:01~B*50:01g~C*04:01g~DRB1*01:02	0.00649351
A*02:02~DQB1*06:02	0.00694444		B*27:05g~DQB1*04:02~DRB1*08:01	0.00757576		A*68:01g~B*08:01g~C*07:01g~DRB1*03:01	0.00649351
A*23:01g~DQB1*03:01	0.00694444		B*38:01~DQB1*03:02~DRB1*04:02	0.00757576		A*11:01g~B*18:01g~C*05:01g~DRB1*13:01	0.00649351
A*30:04g~DQB1*05:01	0.00694444		B*14:02~DQB1*03:02~DRB1*04:03	0.00757576		A*02:01g~B*07:05g~C*07:26~DRB1*04:01	0.00649351
A*26:01g~DQB1*03:01	0.00694444		B*53:01g~DQB1*02:02~DRB1*09:01	0.00757576		A*24:02g~B*07:02g~C*07:02g~DRB1*04:10	0.00649351
A*32:01g~DQB1*03:02	0.00694444		B*50:01g~DQB1*05:01~DRB1*01:02	0.00757576		A*29:02g~B*35:01g~C*16:01g~DRB1*01:01	0.00649351
A*30:01g~DQB1*05:01	0.00694444		B*15:32~DQB1*03:01~DRB1*12:02	0.00757576		A*03:01g~B*57:02~C*18:01g~DRB1*13:02	0.00649351
A*29:02g~DQB1*06:03	0.00694444		B*35:08~DQB1*05:03~DRB1*14:54	0.00757576		A*02:01g~B*40:01g~C*03:04g~DRB1*13:02	0.00649351
A*02:11g~DQB1*02:02	0.00694444		B*14:02~DQB1*05:01~DRB1*01:02	0.00757576		A*02:01g~B*07:05g~C*15:05g~DRB1*10:01	0.00649351
A*68:01g~DQB1*05:01	0.00694444		B*07:05g~DQB1*03:01~DRB1*11:04	0.00757576		A*32:01g~B*38:01~C*12:03g~DRB1*11:04	0.00649351
A*31:01g~DQB1*04:02	0.00694444		B*58:01g~DQB1*06:02~DRB1*11:01	0.00757576		A*69:01~B*35:08~C*12:03g~DRB1*14:54	0.00649351
A*33:03g~DQB1*03:19	0.00694444		B*38:01~DQB1*05:01~DRB1*10:01	0.00757576		A*29:02g~B*40:02g~C*05:01g~DRB1*11:01	0.00649351
A*03:01g~DQB1*06:04	0.00694444		B*53:01g~DQB1*06:04~DRB1*13:01	0.00757576		A*02:01g~B*44:29~C*02:02g~DRB1*13:01	0.00649351
A*33:01g~DQB1*05:01	0.00694444		B*58:02~DQB1*03:19~DRB1*08:04	0.00757576		A*02:01g~B*40:06~C*15:02g~DRB1*14:04	0.00649351
A*66:02~DQB1*02:02	0.00694444		B*42:02~DQB1*06:09~DRB1*13:02	0.00757576		A*01:01g~B*27:05g~C*05:01g~DRB1*04:01	0.00649351
A*01:01g~DQB1*04:02	0.00694444		B*41:01~DQB1*02:02~DRB1*07:01	0.00757576		A*03:01g~B*44:02g~C*01:02g~DRB1*01:01	0.00649351
A*25:01g~DQB1*02:01	0.00694444		B*07:05g~DQB1*05:03~DRB1*14:04	0.00757576		A*02:06g~B*13:02g~C*06:02g~DRB1*07:01	0.00649351
A*02:01g~DQB1*06:04	0.00694444		B*40:01g~DQB1*06:04~DRB1*13:02	0.00757576		A*30:01g~B*58:02~C*06:02g~DRB1*12:01	0.00649351
A*23:01g~DQB1*02:02	0.00694444		B*52:01g~DQB1*06:01~DRB1*15:01	0.00757576		A*68:01g~B*35:01g~C*04:01g~DRB1*04:05	0.00649351
A*26:01g~DQB1*06:03	0.00694444		B*07:02g~DQB1*06:03~DRB1*13:01	0.00757576		A*02:01g~B*51:01g~C*02:02g~DRB1*14:54	0.00649351
A*02:05g~DQB1*03:01	0.00694444		B*81:01g~DQB1*05:01~DRB1*15:02	0.00757576		A*02:01g~B*52:01g~C*12:02g~DRB1*15:02	0.00649351
A*02:05g~DQB1*03:19	0.00694444		B*15:16~DQB1*03:19~DRB1*11:02	0.00757576		A*02:01g~B*40:06~C*15:02g~DRB1*15:02	0.00649351
A*32:01g~DQB1*03:01	0.00694444		B*15:10~DQB1*02:01~DRB1*03:01	0.00757576		A*31:01g~B*40:02g~C*02:02g~DRB1*04:07	0.00649351
A*11:01g~DQB1*06:01	0.00694444		B*58:02~DQB1*04:02~DRB1*04:04	0.00757576		A*33:03g~B*15:16~C*14:02g~DRB1*11:17	0.00649351
A*11:01g~DQB1*06:02	0.00694444		B*15:18g~DQB1*03:02~DRB1*04:01	0.00757576		A*30:01g~B*13:02g~C*06:02g~DRB1*07:01	0.00649351
A*02:01g~DQB1*06:09	0.00694444		B*27:05g~DQB1*06:01~DRB1*04:08	0.00757576		A*02:01g~B*58:01g~C*07:01g~DRB1*13:02	0.00649351
A*29:02g~DQB1*02:02	0.00694444		B*14:02~DQB1*06:03~DRB1*13:01	0.00757576		A*66:01g~B*50:01g~C*06:02g~DRB1*07:01	0.00649351
A*30:02g~B*81:01g	0.00667593		B*49:01g~DQB1*03:01~DRB1*11:04	0.00757576		A*03:01g~B*27:05g~C*02:02g~DRB1*04:08	0.00649351
C*12:03g~DQB1*06:03	0.00667333		B*15:03g~DQB1*05:01~DRB1*11:01	0.00757576		A*68:01g~B*15:18g~C*07:04g~DRB1*04:01	0.00649351
A*24:02g~B*07:05g	0.00664945		B*35:08~DQB1*05:03~DRB1*14:01	0.00757576		A*68:01g~B*58:02~C*06:02g~DRB1*04:04	0.00649351
C*07:02g~DRB1*01:01	0.00663553		B*57:03~DQB1*06:02~DRB1*11:01	0.00757576		A*03:01g~B*58:02~C*04:01g~DRB1*13:01	0.00649351
C*07:02g~DRB1*15:02	0.00656603		B*14:02~DQB1*06:02~DRB1*08:04	0.00757576		A*33:03g~B*53:01g~C*06:02g~DRB1*08:04	0.00649351
B*45:01g~DRB1*01:02	0.00639538		B*15:17~DQB1*06:04~DRB1*12:02	0.00757576		A*11:01g~B*51:01g~C*15:02g~DRB1*15:01	0.00649351
B*15:16~DRB1*01:02	0.00634989		B*15:02g~DQB1*03:01~DRB1*13:02	0.00757576		A*02:05g~B*58:01g~C*03:04g~DRB1*12:01	0.00649351
C*08:02g~DRB1*13:01	0.00632912		B*52:01g~DQB1*03:01~DRB1*15:02	0.00757576		A*02:01g~B*44:02g~C*06:02g~DRB1*15:03	0.00649351
C*07:04g~DRB1*15:02	0.00632912		B*58:02~DQB1*05:01~DRB1*12:01	0.00757576		A*01:01g~B*35:02g~C*04:01g~DRB1*11:04	0.00649351
C*02:02g~DRB1*11:01	0.00632912		B*35:01g~DQB1*03:02~DRB1*04:05	0.00757576		A*11:01g~B*52:01g~C*12:02g~DRB1*08:01	0.00649351
C*02:02g~DRB1*13:03	0.00632912		B*81:01g~DQB1*04:02~DRB1*15:03	0.00757576		A*02:01g~B*51:01g~C*01:02g~DRB1*13:01	0.00649351
C*07:01g~DRB1*11:04	0.00632912		B*35:03g~DQB1*03:03~DRB1*07:01	0.00757576		A*03:01g~B*15:10~C*03:04g~DRB1*11:01	0.00649351
C*12:03g~DRB1*07:01	0.00632912		B*35:03g~DQB1*05:03~DRB1*14:04	0.00757576		A*02:01g~B*58:01g~C*03:02g~DRB1*13:02	0.00649351
C*08:02g~DRB1*01:02	0.00632912		B*35:08~DQB1*03:01~DRB1*11:04	0.00757576		A*02:01g~B*35:08~C*04:01g~DRB1*11:02	0.00649351
C*02:02g~DRB1*04:08	0.00632912		B*18:01g~DQB1*06:01~DRB1*15:02	0.00757576		A*11:01g~B*35:01g~C*04:01g~DRB1*04:01	0.00649351
C*08:01g~DRB1*12:02	0.00632912		B*45:01g~DQB1*06:09~DRB1*13:02	0.0075757		A*11:01g~B*18:01g~C*04:01g~DRB1*01:01	0.00649351
C*12:03g~DRB1*10:01	0.00632912		B*49:01g~DQB1*05:03~DRB1*15:01	0.0075752		A*02:01g~B*15:01g~C*07:04g~DRB1*15:02	0.00649351
C*15:05g~DRB1*11:04	0.00632912		A*02:01g~DQB1*06:01~DRB1*15:02	0.00735294		A*01:01g~B*35:01g~C*04:01g~DRB1*01:01	0.00649351
C*07:01g~DRB1*11:02	0.00632912		A*02:01g~DQB1*06:01~DRB1*15:01	0.00735294		A*11:01g~B*18:01g~C*07:02g~DRB1*15:02	0.00649351
C*03:02g~DRB1*15:03	0.00632912		A*24:02g~DQB1*05:03~DRB1*14:04	0.00735294		A*11:01g~B*56:01g~C*01:02g~DRB1*01:01	0.00649351
C*07:04g~DRB1*08:01	0.00632912		A*26:01g~DQB1*02:01~DRB1*03:01	0.00735294		A*68:02g~B*42:01~C*17:01g~DRB1*03:02	0.00649351
C*18:01g~DRB1*13:02	0.00632912		A*26:01g~DQB1*04:02~DRB1*08:04	0.00735294		A*23:01g~B*49:01g~C*07:01g~DRB1*15:01	0.00649256
C*14:02g~DRB1*15:02	0.00632912		A*24:02g~DQB1*04:02~DRB1*04:05	0.00735294		A*23:01g~C*07:02g~DQB1*06:03~DRB1*15:03	0.00626808
C*18:01g~DRB1*11:02	0.00632912		A*69:01~DQB1*05:03~DRB1*14:01	0.00735294		A*23:01g~B*44:03~C*04:01g~DRB1*07:01	0.00534335
C*16:01g~DRB1*15:01	0.00632912		A*30:01g~DQB1*05:01~DRB1*01:02	0.00735294		A*68:02g~C*02:02g~DQB1*06:02~DRB1*13:01	0.00432075
C*12:02g~DRB1*08:01	0.00632912		A*02:11g~DQB1*05:03~DRB1*14:04	0.00735294		B*15:01g~C*03:03g~DQB1*06:40~DRB1*13:01	0.00416667
C*06:02g~DRB1*11:01	0.00632912		A*24:07~DQB1*02:01~DRB1*03:01	0.00735294		B*38:01~C*12:03g~DQB1*06:03~DRB1*13:01	0.00416667
C*03:02g~DRB1*11:01	0.00632912		A*36:01~DQB1*02:02~DRB1*09:01	0.00735294		B*38:01~C*12:03g~DQB1*06:11~DRB1*13:01	0.00416667
C*08:02g~DRB1*15:03	0.00632912		A*03:01g~DQB1*03:01~DRB1*11:01	0.00735294		B*42:01~C*17:01g~DQB1*04:04~DRB1*03:02	0.00416667
C*04:01g~DRB1*04:03	0.00632912		A*24:03g~DQB1*05:03~DRB1*11:04	0.00735294		B*57:01g~C*06:02g~DQB1*03:30~DRB1*07:01	0.00416667
C*12:03g~DRB1*14:54	0.00632912		A*33:03g~DQB1*03:01~DRB1*14:04	0.00735294		A*02:01g~C*12:03g~DQB1*06:40~DRB1*13:01	0.00409836
C*03:03g~DRB1*04:04	0.00632912		A*30:02g~DQB1*06:09~DRB1*13:02	0.00735294		A*02:01g~C*12:03g~DQB1*06:11~DRB1*13:01	0.00409836
C*03:04g~DRB1*04:01	0.00632912		A*23:01g~DQB1*05:03~DRB1*15:02	0.00735294		A*30:01g~C*17:01g~DQB1*04:04~DRB1*03:02	0.00409836
C*14:02g~DRB1*15:01	0.00632912		A*30:02g~DQB1*04:02~DRB1*03:02	0.00735294		A*01:01g~C*06:02g~DQB1*03:30~DRB1*07:01	0.00409836
C*15:02g~DRB1*04:05	0.00632912		A*11:01g~DQB1*06:04~DRB1*13:02	0.00735294		A*02:01g~B*38:01~C*12:03g~DQB1*06:40	0.00390625
C*07:02g~DRB1*10:01	0.00632912		A*29:02g~DQB1*06:09~DRB1*13:02	0.00735294		A*02:01g~B*38:01~C*12:03g~DQB1*06:11	0.00390625
C*01:02g~DRB1*14:04	0.00632912		A*26:01g~DQB1*03:01~DRB1*08:03	0.00735294		A*30:01g~B*42:01~C*17:01g~DQB1*04:04	0.00390625
C*02:02g~DRB1*15:03	0.00632912		A*02:02~DQB1*06:02~DRB1*11:01	0.00735294		A*01:01g~B*57:01g~C*06:02g~DQB1*03:30	0.00390625
C*07:26~DRB1*04:10	0.00632912		A*68:02g~DQB1*05:01~DRB1*11:02	0.00735294		A*26:01g~B*38:01~DQB1*06:40~DRB1*13:01	0.00378788
C*06:02g~DRB1*13:01	0.00632912		A*43:01~DQB1*03:19~DRB1*15:02	0.00735294		A*26:01g~B*38:01~DQB1*06:11~DRB1*13:01	0.00378788
C*06:02g~DRB1*04:04	0.00632912		A*30:04g~DQB1*03:01~DRB1*11:04	0.00735294		A*01:01g~B*57:01g~DQB1*03:30~DRB1*07:01	0.00378788
C*06:02g~DRB1*01:02	0.00632912		A*23:01g~DQB1*05:01~DRB1*11:01	0.00735294		A*30:01g~B*42:01~DQB1*04:04~DRB1*03:02	0.00378788
C*04:01g~DRB1*09:01	0.00632912		A*32:01g~DQB1*03:02~DRB1*04:03	0.00735294		A*03:01g~B*35:01g~C*07:15~DRB1*04:01	0.00324676
C*04:01g~DRB1*04:05	0.00632912		A*68:01g~DQB1*05:01~DRB1*12:01	0.00735294		A*03:01g~B*35:01g~C*07:02g~DRB1*04:01	0.00324676
C*03:04g~DRB1*15:03	0.00632912		A*30:01g~DQB1*03:02~DRB1*04:05	0.00735294		B*15:10~C*07:01g~DQB1*06:02~DRB1*01:02	0.00208334
C*14:02g~DRB1*11:17	0.00632912		A*24:02g~DQB1*04:02~DRB1*04:10	0.00735294		A*68:02g~C*07:01g~DQB1*05:01~DRB1*01:02	0.00204918
C*14:02g~DRB1*08:03	0.00632912		A*29:02g~DQB1*06:03~DRB1*13:01	0.00735294		A*02:02~B*15:10~C*07:01g~DQB1*05:01	0.00195313
C*07:02g~DRB1*11:02	0.00632912		A*30:01g~DQB1*02:02~DRB1*07:01	0.00735294		A*02:02~B*57:03~C*07:01g~DRB1*01:02	0.00162338
C*02:02g~DRB1*04:07	0.00632912		A*68:02g~DQB1*04:02~DRB1*04:04	0.00735294		B*15:10~C*07:47~DQB1*06:02~DRB1*01:02	0.00104167
C*07:04g~DRB1*04:01	0.00632912		A*33:01g~DQB1*05:01~DRB1*01:02	0.00735294		B*15:10~C*07:46~DQB1*06:02~DRB1*01:02	0.00104167
C*18:01g~DRB1*13:01	0.00632912		A*31:01g~DQB1*04:02~DRB1*01:01	0.00735294		B*15:10~C*07:45~DQB1*06:02~DRB1*01:02	0.00104167
C*08:02g~DRB1*14:01	0.00632912		A*03:01g~DQB1*02:02~DRB1*07:01	0.00735294		B*15:10~C*07:28~DQB1*06:02~DRB1*01:02	0.00104167
C*12:03g~DRB1*04:02	0.00632878		A*68:01g~DQB1*05:01~DRB1*08:01	0.00735294		B*15:10~C*07:22~DQB1*06:02~DRB1*01:02	0.00104167
C*12:03g~DRB1*12:02	0.00632875		A*02:11g~DQB1*03:02~DRB1*04:03	0.00735294		B*15:10~C*07:02g~DQB1*06:02~DRB1*01:02	0.00104167
B*42:01~DRB1*03:102	0.00629848		A*33:03g~DQB1*05:03~DRB1*11:17	0.00735294		A*68:02g~C*07:22~DQB1*05:01~DRB1*01:02	0.00102459
A*30:01g~B*44:03	0.00627515		A*03:01g~DQB1*05:03~DRB1*14:54	0.00735294		A*68:02g~C*07:02g~DQB1*05:01~DRB1*01:02	0.00102459
B*44:03~DRB1*07:01	0.00625768		A*03:01g~DQB1*03:19~DRB1*13:01	0.00735294		A*68:02g~C*07:28~DQB1*05:01~DRB1*01:02	0.00102459
A*24:02g~C*05:01g	0.00622684		A*33:03g~DQB1*06:04~DRB1*08:04	0.00735294		A*68:02g~C*07:45~DQB1*05:01~DRB1*01:02	0.00102459
A*68:01g~B*08:01g	0.00621552		A*25:01g~DQB1*02:01~DRB1*03:01	0.00735294		A*68:02g~C*07:47~DQB1*05:01~DRB1*01:02	0.00102459
A*68:02g~B*14:01	0.00621552		A*01:01g~DQB1*04:02~DRB1*07:01	0.00735294		A*68:02g~C*07:46~DQB1*05:01~DRB1*01:02	0.00102459
A*68:02g~DRB1*11:01	0.00621119		A*66:02~DQB1*02:02~DRB1*03:02	0.00735294		A*02:02~B*15:10~C*07:28~DQB1*05:01	0.000976563
A*23:01g~C*07:02g	0.00613653		A*26:01g~DQB1*06:03~DRB1*13:01	0.00735294		A*02:02~B*15:10~C*07:45~DQB1*05:01	0.000976563
A*33:01g~DRB1*13:01	0.00607824		A*02:01g~DQB1*06:04~DRB1*13:02	0.00735294		A*02:02~B*15:10~C*07:47~DQB1*05:01	0.000976563
A*43:01~B*15:03g	0.0060774		A*23:01g~DQB1*02:02~DRB1*07:01	0.00735294		A*02:02~B*15:10~C*07:02g~DQB1*05:01	0.000976563
A*29:02g~DRB1*13:01	0.00605489		A*02:01g~DQB1*03:02~DRB1*04:02	0.00735294		A*02:02~B*15:10~C*07:22~DQB1*05:01	0.000976563
A*30:02g~B*45:01g	0.00593927		A*02:05g~DQB1*03:19~DRB1*11:02	0.00735294		A*02:02~B*15:10~C*07:46~DQB1*05:01	0.000976563
A*30:02g~DRB1*07:01	0.00592284		A*02:01g~DQB1*03:01~DRB1*15:03	0.00735294		A*02:01g~B*15:16~C*16:01g~DRB1*01:02	0.000845309
A*02:05g~DRB1*07:01	0.00590996		A*02:05g~DQB1*06:02~DRB1*12:01	0.00735294		A*02:02~B*57:03~C*07:47~DRB1*01:02	0.000811689
C*02:02g~DQB1*06:03	0.00588235		A*01:01g~DQB1*03:01~DRB1*04:01	0.00735294		A*02:02~B*57:03~C*07:22~DRB1*01:02	0.000811689
B*15:01g~DRB1*04:04	0.00581398		A*03:01g~DQB1*03:01~DRB1*01:01	0.00735294		A*02:02~B*57:03~C*07:28~DRB1*01:02	0.000811689
B*15:01g~DRB1*04:01	0.00581398		A*02:01g~DQB1*03:01~DRB1*11:04	0.00735294		A*02:02~B*57:03~C*07:45~DRB1*01:02	0.000811689
B*15:17~DRB1*11:01	0.00581398		A*11:01g~DQB1*06:01~DRB1*15:02	0.00735294		A*02:02~B*57:03~C*07:46~DRB1*01:02	0.000811689
B*47:01~DRB1*13:01	0.00581398		A*03:01g~DQB1*03:01~DRB1*04:08	0.00735294		A*02:02~B*57:03~C*07:02g~DRB1*01:02	0.000811689
B*15:16~DRB1*11:17	0.00581398		A*03:01g~DQB1*06:09~DRB1*13:02	0.00735294		A*68:53~B*15:10~C*03:04g~DRB1*03:01	0.000360751
B*58:01g~DRB1*13:02	0.00581398		A*02:01g~DQB1*06:02~DRB1*11:01	0.00735294		A*68:81~B*15:10~C*03:04g~DRB1*03:01	0.000360751
B*58:01g~DRB1*11:02	0.00581398		A*02:01g~DQB1*03:03~DRB1*13:01	0.00735294		A*68:80~B*15:10~C*03:04g~DRB1*03:01	0.000360751
B*15:10~DRB1*03:01	0.00581398		A*68:01g~DQB1*06:01~DRB1*15:02	0.00735294		A*68:82~B*15:10~C*03:04g~DRB1*03:01	0.000360751
B*35:05~DRB1*12:02	0.00581398		A*01:01g~C*07:01g~DRB1*15:01	0.00725095		A*68:78~B*15:10~C*03:04g~DRB1*03:01	0.000360751
B*35:03g~DRB1*13:01	0.00581398		A*24:02g~C*07:02g~DRB1*03:01	0.00725095		A*68:77~B*15:10~C*03:04g~DRB1*03:01	0.000360751
B*18:01g~DRB1*15:02	0.00581398		A*01:01g~B*42:01~DQB1*04:02	0.00714286		A*68:74~B*15:10~C*03:04g~DRB1*03:01	0.000360751
B*18:01g~DRB1*03:01	0.00581398		A*24:02g~B*07:02g~DQB1*02:01	0.00714286		A*68:67~B*15:10~C*03:04g~DRB1*03:01	0.000360751
A*24:02g~DRB1*12:02	0.00581397		A*32:01g~B*07:02g~DQB1*02:02	0.00714286		A*68:64~B*15:10~C*03:04g~DRB1*03:01	0.000360751
A*33:03g~DRB1*11:17	0.00581397		A*24:02g~B*41:01~DQB1*03:03	0.00714286		A*68:62~B*15:10~C*03:04g~DRB1*03:01	0.000360751
A*33:03g~DRB1*08:04	0.00581397		A*24:02g~B*07:05g~DQB1*05:03	0.00714286		A*68:60~B*15:10~C*03:04g~DRB1*03:01	0.000360751
A*32:01g~DRB1*10:01	0.00581397		A*32:01g~B*40:06~DQB1*05:01	0.00714286		A*68:49N~B*15:10~C*03:04g~DRB1*03:01	0.000360751
A*02:01g~DRB1*15:01	0.00581397		A*02:11g~B*15:01g~DQB1*05:03	0.00714286		A*68:48~B*15:10~C*03:04g~DRB1*03:01	0.000360751
A*02:01g~DRB1*11:04	0.00581397		A*24:07~B*08:01g~DQB1*02:01	0.00714286		A*68:44~B*15:10~C*03:04g~DRB1*03:01	0.000360751
A*31:01g~DRB1*11:01	0.00581397		A*26:01g~B*51:01g~DQB1*03:01	0.00714286		A*68:40~B*15:10~C*03:04g~DRB1*03:01	0.000360751
A*24:02g~DRB1*11:01	0.00581397		A*30:02g~B*81:01g~DQB1*06:02	0.00714286		A*68:34~B*15:10~C*03:04g~DRB1*03:01	0.000360751
A*03:01g~DRB1*14:54	0.00581397		A*36:01~B*53:01g~DQB1*05:01	0.00714286		A*68:18N~B*15:10~C*03:04g~DRB1*03:01	0.000360751
B*14:01~C*17:01g	0.00581395		A*30:01g~B*50:01g~DQB1*02:02	0.00714286		A*68:02g~C*02:02g~DQB1*06:02~DRB1*13:215	0.000254162
B*44:02g~C*06:02g	0.00581395		A*26:01g~B*14:02~DQB1*04:02	0.00714286		A*68:02g~C*02:02g~DQB1*06:02~DRB1*13:117	0.000254162
B*15:32~C*12:03g	0.00581395		A*24:02g~B*15:32~DQB1*03:01	0.00714286		A*68:02g~C*02:02g~DQB1*06:02~DRB1*13:190	0.000254162
B*18:01g~C*07:01g	0.00581395		A*26:01g~B*58:01g~DQB1*06:02	0.00714286		A*68:02g~C*02:02g~DQB1*06:02~DRB1*13:233	0.000254162
B*27:05g~C*07:04g	0.00581395		A*30:02g~B*18:01g~DQB1*02:01	0.00714286		A*23:01g~C*07:02g~DQB1*06:110~DRB1*15:03	0.00024108
B*15:02g~C*08:01g	0.00581395		A*30:01g~B*13:02g~DQB1*02:02	0.00714286		A*23:01g~C*07:02g~DQB1*06:41~DRB1*15:03	0.00024108
B*35:03g~C*12:03g	0.00581395		A*32:01g~B*15:01g~DQB1*03:02	0.00714286		A*23:01g~C*07:02g~DQB1*06:223~DRB1*15:03	0.00024108
B*44:29~C*05:01g	0.00581395		A*11:01g~B*18:01g~DQB1*06:03	0.00714286		A*23:01g~C*07:02g~DQB1*06:218~DRB1*15:03	0.00024108
B*15:01g~C*03:04g	0.00581395		A*23:01g~B*49:01g~DQB1*05:03	0.00714286		A*23:01g~C*07:02g~DQB1*06:221~DRB1*15:03	0.00024108
B*15:03g~C*04:01g	0.00581395		A*30:02g~B*45:01g~DQB1*06:09	0.00714286		A*23:01g~C*07:02g~DQB1*06:44~DRB1*15:03	0.00024108
B*57:02~C*18:01g	0.00581395		A*24:02g~B*07:05g~DQB1*03:01	0.00714286		A*23:01g~C*07:02g~DQB1*06:185~DRB1*15:03	0.00024108
B*15:18g~C*07:04g	0.00581395		A*29:02g~B*42:02~DQB1*06:09	0.00714286		A*23:01g~C*07:02g~DQB1*06:187~DRB1*15:03	0.00024108
B*40:01g~C*03:04g	0.00581395		A*02:01g~B*07:05g~DQB1*03:02	0.00714286		A*68:02g~C*02:02g~DQB1*06:200~DRB1*13:01	0.000154313
B*51:01g~C*15:02g	0.00581395		A*23:01g~B*44:03~DQB1*02:02	0.00714286		A*68:02g~C*02:02g~DQB1*06:47~DRB1*13:01	0.000154313
B*42:02~C*08:04	0.00581395		A*11:01g~B*15:17~DQB1*06:04	0.00714286		A*68:02g~C*02:02g~DQB1*06:117~DRB1*13:01	0.000154313
B*57:03~C*18:01g	0.00581395		A*24:02g~B*15:02g~DQB1*03:01	0.00714286		A*68:02g~C*02:02g~DQB1*06:188~DRB1*13:01	0.000154313
B*81:01g~C*18:01g	0.00581395		A*02:02~B*57:03~DQB1*06:02	0.00714286		A*68:02g~C*02:02g~DQB1*06:228~DRB1*13:01	0.000154313
B*35:02g~C*04:01g	0.00581395		A*30:02g~B*42:01~DQB1*04:02	0.00714286		A*68:02g~C*02:02g~DQB1*06:227~DRB1*13:01	0.000154313
B*15:16~C*16:01g	0.00581395		A*24:02g~B*15:24~DQB1*03:02	0.00714286		A*68:02g~C*02:02g~DQB1*06:226~DRB1*13:01	0.000154313
B*35:03g~C*03:03g	0.00581395		A*03:01g~B*35:03g~DQB1*03:01	0.00714286		A*68:02g~C*02:02g~DQB1*06:224~DRB1*13:01	0.000154313
B*15:24~C*04:01g	0.00581395		A*43:01~B*81:01g~DQB1*03:19	0.00714286		A*68:02g~C*02:02g~DQB1*06:127~DRB1*13:01	0.000154313
B*81:01g~C*04:01g	0.00581395		A*68:02g~B*15:16~DQB1*05:01	0.00714286		A*68:02g~C*02:02g~DQB1*06:219~DRB1*13:01	0.000154313
B*15:01g~C*01:02g	0.00581395		A*33:03g~B*35:08~DQB1*03:01	0.00714286		A*68:02g~C*02:02g~DQB1*06:109~DRB1*13:01	0.000154313
B*45:01g~C*16:01g	0.00581395		A*25:01g~B*08:01g~DQB1*02:01	0.00714286		A*68:02g~C*02:02g~DQB1*06:111~DRB1*13:01	0.000154313
B*15:03g~C*02:02g	0.00581395		A*68:01g~B*44:02g~DQB1*04:02	0.00714286		A*68:02g~C*02:02g~DQB1*06:225~DRB1*13:01	0.000154313
B*44:03~C*04:01g	0.00581395		A*31:01g~B*27:05g~DQB1*05:01	0.00714286		A*68:02g~C*02:02g~DQB1*06:84~DRB1*13:01	0.000154313
B*41:01~C*17:01g	0.00581395		A*33:03g~B*15:16~DQB1*05:03	0.00714286		A*68:02g~C*02:02g~DQB1*06:116~DRB1*13:01	0.000154313
B*07:05g~C*07:26	0.00581395		A*30:04g~B*49:01g~DQB1*03:01	0.00714286		A*02:07g~B*15:16~C*16:01g~DRB1*01:02	0.000115269
B*18:01g~C*07:04g	0.00581395		A*23:01g~B*15:03g~DQB1*05:01	0.00714286		A*02:29~B*15:16~C*16:01g~DRB1*01:02	3.84232e-05
B*58:01g~C*03:04g	0.00581395		A*24:03g~B*35:03g~DQB1*05:03	0.00714286		A*02:279~B*15:16~C*16:01g~DRB1*01:02	3.84232e-05
B*56:01g~C*01:02g	0.00581395		A*68:01g~B*35:01g~DQB1*03:02	0.00714286		A*02:282~B*15:16~C*16:01g~DRB1*01:02	3.84232e-05
B*07:05g~C*07:02g	0.00581395		A*30:01g~B*58:02~DQB1*05:01	0.00714286		A*02:283~B*15:16~C*16:01g~DRB1*01:02	3.84232e-05
B*35:08~C*04:01g	0.00581395		A*33:01g~B*14:02~DQB1*05:01	0.00714286		A*02:284N~B*15:16~C*16:01g~DRB1*01:02	3.84232e-05
B*18:01g~C*07:02g	0.00581395		A*68:01g~B*15:10~DQB1*04:02	0.00714286		A*02:285~B*15:16~C*16:01g~DRB1*01:02	3.84232e-05
B*37:01g~C*06:02g	0.00581395		A*68:02g~B*58:02~DQB1*02:01	0.00714286		A*02:287~B*15:16~C*16:01g~DRB1*01:02	3.84232e-05
A*68:02g~DQB1*06:02	0.00575114		A*03:01g~B*53:01g~DQB1*03:19	0.00714286		A*02:288~B*15:16~C*16:01g~DRB1*01:02	3.84232e-05
A*26:01g~C*03:02g	0.00568182		A*33:03g~B*58:02~DQB1*06:04	0.00714286		A*02:289~B*15:16~C*16:01g~DRB1*01:02	3.84232e-05
A*30:02g~C*05:01g	0.00568182		A*02:05g~B*44:02g~DQB1*03:01	0.00714286		A*02:275~B*15:16~C*16:01g~DRB1*01:02	3.84232e-05
A*23:01g~C*07:01g	0.00568182		A*66:02~B*41:01~DQB1*02:02	0.00714286		A*02:292~B*15:16~C*16:01g~DRB1*01:02	3.84232e-05
A*11:01g~C*12:03g	0.00568182		A*03:01g~B*44:03~DQB1*02:02	0.00714286		A*02:293Q~B*15:16~C*16:01g~DRB1*01:02	3.84232e-05
A*11:01g~C*08:01g	0.00568182		A*29:02g~B*57:01g~DQB1*03:03	0.00714286		A*02:296~B*15:16~C*16:01g~DRB1*01:02	3.84232e-05
A*43:01~C*08:04	0.00568182		A*02:05g~B*44:02g~DQB1*05:01	0.00714286		A*02:299~B*15:16~C*16:01g~DRB1*01:02	3.84232e-05
A*11:01g~C*03:03g	0.00568182		A*02:01g~B*58:01g~DQB1*03:19	0.00714286		A*02:30~B*15:16~C*16:01g~DRB1*01:02	3.84232e-05
A*25:01g~C*07:01g	0.00568182		A*26:01g~B*38:01~DQB1*06:03	0.00714286		A*02:301N~B*15:16~C*16:01g~DRB1*01:02	3.84232e-05
A*26:01g~C*04:01g	0.00568182		A*02:01g~B*51:01g~DQB1*03:03	0.00714286		A*02:302~B*15:16~C*16:01g~DRB1*01:02	3.84232e-05
A*23:01g~C*18:01g	0.00568182		A*01:01g~B*35:03g~DQB1*03:03	0.00714286		A*02:306~B*15:16~C*16:01g~DRB1*01:02	3.84232e-05
A*30:02g~C*17:01g	0.00568182		A*02:01g~B*40:01g~DQB1*06:04	0.00714286		A*02:250N~B*15:16~C*16:01g~DRB1*01:02	3.84232e-05
A*30:04g~C*07:01g	0.00568182		A*01:01g~B*44:02g~DQB1*05:01	0.00714286		A*02:235~B*15:16~C*16:01g~DRB1*01:02	3.84232e-05
A*01:01g~C*12:03g	0.00568182		A*11:01g~B*35:01g~DQB1*03:02	0.00714286		A*02:236~B*15:16~C*16:01g~DRB1*01:02	3.84232e-05
A*26:01g~C*03:03g	0.00568182		A*32:01g~B*07:05g~DQB1*05:01	0.00714286		A*02:238~B*15:16~C*16:01g~DRB1*01:02	3.84232e-05
A*30:02g~C*16:01g	0.00568182		A*02:01g~B*38:01~DQB1*03:01	0.00714286		A*02:24~B*15:16~C*16:01g~DRB1*01:02	3.84232e-05
A*68:02g~C*18:01g	0.00568182		A*68:01g~B*15:18g~DQB1*06:01	0.00714286		A*02:240~B*15:16~C*16:01g~DRB1*01:02	3.84232e-05
A*43:01~C*14:02g	0.00568182		A*02:01g~B*40:06~DQB1*03:02	0.00714286		A*02:242~B*15:16~C*16:01g~DRB1*01:02	3.84232e-05
A*32:01g~C*15:02g	0.00568182		A*03:01g~B*15:10~DQB1*06:09	0.00714286		A*02:246~B*15:16~C*16:01g~DRB1*01:02	3.84232e-05
A*24:02g~C*15:05g	0.00568182		A*11:01g~B*18:01g~DQB1*06:01	0.00714286		A*02:25~B*15:16~C*16:01g~DRB1*01:02	3.84232e-05
A*32:01g~C*17:01g	0.00568182		A*11:01g~B*56:01g~DQB1*05:01	0.00714286		A*02:307~B*15:16~C*16:01g~DRB1*01:02	3.84232e-05
A*31:01g~C*05:01g	0.00568182		A*31:01g~B*15:01g~DQB1*06:03	0.00714286		A*02:251~B*15:16~C*16:01g~DRB1*01:02	3.84232e-05
A*24:17~C*03:02g	0.00568182		A*29:02g~B*07:02g~DQB1*06:02	0.00714286		A*02:254~B*15:16~C*16:01g~DRB1*01:02	3.84232e-05
A*74:01g~C*02:02g	0.00568182		A*68:02g~C*16:01g~DRB1*01:02	0.00668074		A*02:257~B*15:16~C*16:01g~DRB1*01:02	3.84232e-05
A*24:02g~C*14:02g	0.00568182		A*30:02g~B*45:01g~DRB1*01:02	0.00665591		A*02:263~B*15:16~C*16:01g~DRB1*01:02	3.84232e-05
A*03:01g~C*03:04g	0.00568182		A*68:02g~B*14:01~DRB1*07:01	0.00665591		A*02:269~B*15:16~C*16:01g~DRB1*01:02	3.84232e-05
A*32:01g~C*04:01g	0.00568182		A*68:01g~B*08:01g~DRB1*03:01	0.00659503		A*02:272~B*15:16~C*16:01g~DRB1*01:02	3.84232e-05
A*24:03g~C*07:02g	0.00568182		A*68:02g~B*15:10~DRB1*11:01	0.00650233		A*02:273~B*15:16~C*16:01g~DRB1*01:02	3.84232e-05
A*02:11g~C*01:02g	0.00568182		B*51:01g~C*02:02g~DRB1*04:01	0.00649377		A*02:274~B*15:16~C*16:01g~DRB1*01:02	3.84232e-05
A*36:01~C*04:01g	0.00568182		A*24:02g~B*15:01g~DRB1*04:04	0.00649357		A*02:77~B*15:16~C*16:01g~DRB1*01:02	3.84232e-05
A*29:02g~C*05:01g	0.00568182		A*30:02g~B*14:02~DRB1*15:03	0.00649357		A*02:53N~B*15:16~C*16:01g~DRB1*01:02	3.84232e-05
A*03:01g~C*18:01g	0.00568182		A*33:01g~B*14:02~DRB1*13:01	0.00649357		A*02:59~B*15:16~C*16:01g~DRB1*01:02	3.84232e-05
A*02:05g~C*05:01g	0.00568182		A*02:05g~B*50:01g~DRB1*07:01	0.00649357		A*02:60~B*15:16~C*16:01g~DRB1*01:02	3.84232e-05
A*32:01g~C*15:05g	0.00568182		A*02:01g~B*52:01g~DRB1*14:04	0.00649357		A*02:62~B*15:16~C*16:01g~DRB1*01:02	3.84232e-05
A*29:02g~C*03:03g	0.00568182		A*11:01g~B*15:01g~DRB1*13:01	0.00649357		A*02:64~B*15:16~C*16:01g~DRB1*01:02	3.84232e-05
A*31:01g~C*07:02g	0.00568182		A*24:02g~B*18:01g~DRB1*11:04	0.00649357		A*02:67~B*15:16~C*16:01g~DRB1*01:02	3.84232e-05
A*68:01g~C*04:01g	0.00568182		A*33:03g~B*15:16~DRB1*11:17	0.00649357		A*02:71~B*15:16~C*16:01g~DRB1*01:02	3.84232e-05
A*68:01g~C*07:02g	0.00568182		A*03:01g~B*51:01g~DRB1*04:01	0.00649357		A*02:74~B*15:16~C*16:01g~DRB1*01:02	3.84232e-05
A*68:02g~C*02:02g	0.00568182		A*31:01g~B*27:05g~DRB1*04:01	0.00649357		A*02:42~B*15:16~C*16:01g~DRB1*01:02	3.84232e-05
A*26:01g~C*14:02g	0.00568182		A*69:01~B*15:17~DRB1*11:01	0.00649357		A*02:82N~B*15:16~C*16:01g~DRB1*01:02	3.84232e-05
A*68:01g~C*07:01g	0.00568182		A*02:01g~B*38:01~DRB1*13:01	0.00649357		A*02:85~B*15:16~C*16:01g~DRB1*01:02	3.84232e-05
A*02:01g~C*07:26	0.00568182		A*02:01g~B*58:01g~DRB1*13:02	0.00649357		A*02:86~B*15:16~C*16:01g~DRB1*01:02	3.84232e-05
A*03:01g~C*06:02g	0.00568182		A*31:01g~B*35:01g~DRB1*11:01	0.00649357		A*02:88N~B*15:16~C*16:01g~DRB1*01:02	3.84232e-05
A*02:06g~C*15:02g	0.00568182		A*11:01g~B*35:03g~DRB1*13:01	0.00649357		A*02:93~B*15:16~C*16:01g~DRB1*01:02	3.84232e-05
A*03:01g~C*12:02g	0.00568182		A*03:01g~B*47:01~DRB1*13:01	0.00649357		A*02:94N~B*15:16~C*16:01g~DRB1*01:02	3.84232e-05
A*02:01g~C*15:02g	0.00568182		A*11:01g~B*18:01g~DRB1*15:02	0.00649357		A*02:95~B*15:16~C*16:01g~DRB1*01:02	3.84232e-05
A*68:01g~C*06:02g	0.00568182		A*03:01g~B*27:05g~DRB1*04:01	0.00649357		A*02:96~B*15:16~C*16:01g~DRB1*01:02	3.84232e-05
A*33:03g~C*06:02g	0.00568182		A*24:07~B*35:05~DRB1*12:02	0.00649357		A*02:322~B*15:16~C*16:01g~DRB1*01:02	3.84232e-05
A*01:01g~C*05:01g	0.00568182		A*02:11g~B*40:06~DRB1*15:01	0.00649357		A*02:31~B*15:16~C*16:01g~DRB1*01:02	3.84232e-05
A*66:01g~C*07:01g	0.00568182		B*07:02g~C*07:02g~DRB1*13:01	0.00649356		A*02:311~B*15:16~C*16:01g~DRB1*01:02	3.84232e-05
A*33:03g~C*14:02g	0.00568182		B*40:06~C*15:02g~DRB1*15:01	0.00649351		A*02:312~B*15:16~C*16:01g~DRB1*01:02	3.84232e-05
A*11:01g~C*15:02g	0.00568182		B*40:02g~C*02:02g~DRB1*11:01	0.00649351		A*02:313~B*15:16~C*16:01g~DRB1*01:02	3.84232e-05
A*03:01g~C*03:02g	0.00568182		B*38:01~C*12:03g~DRB1*13:01	0.00649351		A*02:314N~B*15:16~C*16:01g~DRB1*01:02	3.84232e-05
A*02:05g~C*03:04g	0.00568182		B*15:32~C*12:03g~DRB1*12:02	0.00649351		A*02:317~B*15:16~C*16:01g~DRB1*01:02	3.84232e-05
A*02:01g~C*07:04g	0.00568182		B*08:01g~C*07:01g~DRB1*15:01	0.00649351		A*02:318~B*15:16~C*16:01g~DRB1*01:02	3.84232e-05
A*26:01g~C*12:03g	0.00568175		B*58:01g~C*07:01g~DRB1*11:02	0.00649351		A*02:321N~B*15:16~C*16:01g~DRB1*01:02	3.84232e-05
A*02:05g~B*50:01g	0.00552491		B*14:02~C*08:02g~DRB1*01:02	0.00649351		A*02:234~B*15:16~C*16:01g~DRB1*01:02	3.84232e-05
A*32:01g~B*15:01g	0.00552491		B*18:01g~C*07:01g~DRB1*11:04	0.00649351		A*02:325~B*15:16~C*16:01g~DRB1*01:02	3.84232e-05
A*23:01g~B*49:01g	0.00552491		B*27:05g~C*02:02g~DRB1*13:03	0.00649351		A*02:326~B*15:16~C*16:01g~DRB1*01:02	3.84232e-05
A*69:01~B*35:08	0.00552491		B*07:05g~C*12:03g~DRB1*11:04	0.00649351		A*02:32N~B*15:16~C*16:01g~DRB1*01:02	3.84232e-05
A*69:01~B*15:17	0.00552491		B*27:05g~C*07:04g~DRB1*08:01	0.00649351		A*02:33~B*15:16~C*16:01g~DRB1*01:02	3.84232e-05
A*26:01g~B*38:01	0.00552491		B*38:01~C*15:05g~DRB1*10:01	0.00649351		A*02:332~B*15:16~C*16:01g~DRB1*01:02	3.84232e-05
A*11:01g~B*52:01g	0.00552491		B*27:05g~C*02:02g~DRB1*04:08	0.00649351		A*02:335~B*15:16~C*16:01g~DRB1*01:02	3.84232e-05
A*31:01g~B*35:03g	0.00552491		B*15:17~C*08:01g~DRB1*12:02	0.00649351		A*02:336~B*15:16~C*16:01g~DRB1*01:02	3.84232e-05
A*03:01g~B*47:01	0.00552491		B*15:02g~C*07:01g~DRB1*13:02	0.00649351		A*02:34~B*15:16~C*16:01g~DRB1*01:02	3.84232e-05
A*24:02g~B*18:01g	0.00552491		B*44:29~C*05:01g~DRB1*13:01	0.00649351		A*02:166~B*15:16~C*16:01g~DRB1*01:02	3.84232e-05
C*03:03g~DQB1*03:02	0.00532039		B*35:03g~C*12:03g~DRB1*07:01	0.00649351		A*02:153~B*15:16~C*16:01g~DRB1*01:02	3.84232e-05
A*23:01g~DQB1*06:03	0.00531046		B*51:01g~C*03:04g~DRB1*15:01	0.00649351		A*02:159~B*15:16~C*16:01g~DRB1*01:02	3.84232e-05
A*23:01g~DRB1*13:01	0.00524821		B*15:01g~C*14:02g~DRB1*04:01	0.00649351		A*02:160~B*15:16~C*16:01g~DRB1*01:02	3.84232e-05
A*30:02g~B*58:01g	0.0051796		B*35:08~C*12:03g~DRB1*14:01	0.00649351		A*02:161~B*15:16~C*16:01g~DRB1*01:02	3.84232e-05
A*24:02g~DRB1*15:03	0.00516797		B*49:01g~C*07:01g~DRB1*11:01	0.00649351		A*02:162~B*15:16~C*16:01g~DRB1*01:02	3.84232e-05
B*52:01g~DRB1*14:04	0.00511397		B*37:01g~C*06:02g~DRB1*11:01	0.00649351		A*02:163~B*15:16~C*16:01g~DRB1*01:02	3.84232e-05
A*03:01g~DRB1*07:01	0.00508759		B*44:02g~C*05:01g~DRB1*04:01	0.00649351		A*02:164~B*15:16~C*16:01g~DRB1*01:02	3.84232e-05
B*15:02g~DRB1*12:02	0.00508723		B*15:03g~C*04:01g~DRB1*11:04	0.00649351		A*02:165~B*15:16~C*16:01g~DRB1*01:02	3.84232e-05
B*57:03~DRB1*13:03	0.00508723		B*15:18g~C*07:04g~DRB1*04:01	0.00649351		A*02:151~B*15:16~C*16:01g~DRB1*01:02	3.84232e-05
A*68:02g~DRB1*13:02	0.00508722		B*44:03~C*16:01g~DRB1*15:01	0.00649351		A*02:167~B*15:16~C*16:01g~DRB1*01:02	3.84232e-05
A*02:01g~DRB1*14:04	0.00504335		B*15:01g~C*03:03g~DRB1*04:04	0.00649351		A*02:168~B*15:16~C*16:01g~DRB1*01:02	3.84232e-05
A*29:02g~DRB1*11:01	0.00501118		B*58:01g~C*03:02g~DRB1*15:03	0.00649351		A*02:173~B*15:16~C*16:01g~DRB1*01:02	3.84232e-05
B*42:01~DRB1*03:115	0.00484498		B*57:02~C*18:01g~DRB1*13:02	0.00649351		A*02:174~B*15:16~C*16:01g~DRB1*01:02	3.84232e-05
A*43:01~B*81:01g	0.00483429		B*40:01g~C*03:04g~DRB1*13:02	0.00649351		A*02:175~B*15:16~C*16:01g~DRB1*01:02	3.84232e-05
A*03:01g~DRB1*01:02	0.00471534		B*15:01g~C*04:01g~DRB1*04:03	0.00649351		A*02:176~B*15:16~C*16:01g~DRB1*01:02	3.84232e-05
B*07:02g~DRB1*04:01	0.00471491		B*51:01g~C*15:02g~DRB1*15:01	0.00649351		A*02:177~B*15:16~C*16:01g~DRB1*01:02	3.84232e-05
A*74:01g~B*57:03	0.00460409		B*57:03~C*18:01g~DRB1*13:01	0.00649351		A*02:18~B*15:16~C*16:01g~DRB1*01:02	3.84232e-05
A*03:01g~DRB1*13:01	0.00454055		B*15:01g~C*01:02g~DRB1*14:04	0.00649351		A*02:123~B*15:16~C*16:01g~DRB1*01:02	3.84232e-05
A*68:01g~DRB1*15:03	0.00443139		B*81:01g~C*18:01g~DRB1*11:02	0.00649351		A*02:105~B*15:16~C*16:01g~DRB1*01:02	3.84232e-05
A*03:01g~B*58:02	0.00440059		B*15:16~C*14:02g~DRB1*15:02	0.00649351		A*02:107~B*15:16~C*16:01g~DRB1*01:02	3.84232e-05
A*30:02g~B*39:10	0.00437388		B*52:01g~C*12:02g~DRB1*11:04	0.00649351		A*02:109~B*15:16~C*16:01g~DRB1*01:02	3.84232e-05
B*42:02~DRB1*12:01	0.00421514		B*35:02g~C*04:01g~DRB1*08:01	0.00649351		A*02:111~B*15:16~C*16:01g~DRB1*01:02	3.84232e-05
A*68:02g~B*15:16	0.00414368		B*51:01g~C*14:02g~DRB1*08:03	0.00649351		A*02:114~B*15:16~C*16:01g~DRB1*01:02	3.84232e-05
A*23:01g~DRB1*11:01	0.00406986		B*45:01g~C*16:01g~DRB1*01:02	0.00649351		A*02:118~B*15:16~C*16:01g~DRB1*01:02	3.84232e-05
B*35:01g~DRB1*04:01	0.00400606		B*35:08~C*12:03g~DRB1*14:54	0.00649351		A*02:119~B*15:16~C*16:01g~DRB1*01:02	3.84232e-05
A*11:01g~DRB1*07:01	0.00399752		B*58:01g~C*03:02g~DRB1*11:01	0.00649351		A*02:121~B*15:16~C*16:01g~DRB1*01:02	3.84232e-05
A*68:125~DRB1*15:03	0.00396696		B*15:16~C*16:01g~DRB1*01:02	0.00649351		A*02:181~B*15:16~C*16:01g~DRB1*01:02	3.84232e-05
A*02:01g~DRB1*15:02	0.00393308		B*40:06~C*15:02g~DRB1*10:01	0.00649351		A*02:133~B*15:16~C*16:01g~DRB1*01:02	3.84232e-05
A*23:01g~B*45:01g	0.0039217		B*07:02g~C*07:02g~DRB1*04:05	0.00649351		A*02:138~B*15:16~C*16:01g~DRB1*01:02	3.84232e-05
A*02:01g~DRB1*13:02	0.00390828		B*50:01g~C*06:02g~DRB1*13:02	0.00649351		A*02:139~B*15:16~C*16:01g~DRB1*01:02	3.84232e-05
A*66:02~DRB1*03:02	0.00387598		B*58:01g~C*07:01g~DRB1*07:01	0.00649351		A*02:141~B*15:16~C*16:01g~DRB1*01:02	3.84232e-05
A*29:02g~B*42:01	0.00386715		B*14:02~C*08:02g~DRB1*08:04	0.00649351		A*02:145~B*15:16~C*16:01g~DRB1*01:02	3.84232e-05
C*12:03g~DQB1*06:40	0.00384615		B*81:01g~C*04:01g~DRB1*15:03	0.00649351		A*02:147~B*15:16~C*16:01g~DRB1*01:02	3.84232e-05
C*12:03g~DQB1*06:11	0.00384615		B*07:05g~C*07:26~DRB1*04:10	0.00649351		A*02:149~B*15:16~C*16:01g~DRB1*01:02	3.84232e-05
C*17:01g~DQB1*04:04	0.00384615		B*18:01g~C*04:01g~DRB1*01:01	0.00649351		A*02:150~B*15:16~C*16:01g~DRB1*01:02	3.84232e-05
A*02:01g~C*01:02g	0.00382585		B*15:01g~C*07:04g~DRB1*15:02	0.00649351		A*02:220~B*15:16~C*16:01g~DRB1*01:02	3.84232e-05
A*68:02g~DRB1*03:02	0.00376413		B*44:03~C*04:01g~DRB1*07:01	0.00649351		A*02:207~B*15:16~C*16:01g~DRB1*01:02	3.84232e-05
A*30:01g~DRB1*07:01	0.00376413		B*58:01g~C*03:04g~DRB1*15:03	0.00649351		A*02:208~B*15:16~C*16:01g~DRB1*01:02	3.84232e-05
A*30:01g~B*53:01g	0.00376387		B*44:02g~C*06:02g~DRB1*12:01	0.00649351		A*02:211~B*15:16~C*16:01g~DRB1*01:02	3.84232e-05
A*24:02g~DRB1*03:01	0.00371414		B*53:01g~C*04:01g~DRB1*01:02	0.00649351		A*02:214~B*15:16~C*16:01g~DRB1*01:02	3.84232e-05
B*81:01g~DRB1*11:01	0.00370193		B*50:01g~C*06:02g~DRB1*09:01	0.00649351		A*02:215~B*15:16~C*16:01g~DRB1*01:02	3.84232e-05
A*23:01g~B*44:03	0.00368327		B*15:16~C*14:02g~DRB1*11:17	0.00649351		A*02:216~B*15:16~C*16:01g~DRB1*01:02	3.84232e-05
A*02:11g~DRB1*14:04	0.00367761		B*58:02~C*06:02g~DRB1*08:04	0.00649351		A*02:218~B*15:16~C*16:01g~DRB1*01:02	3.84232e-05
DQB1*06:40~DRB1*13:01	0.00367647		B*53:01g~C*04:01g~DRB1*13:01	0.00649351		A*02:219~B*15:16~C*16:01g~DRB1*01:02	3.84232e-05
DQB1*03:30~DRB1*07:01	0.00367647		B*07:05g~C*07:02g~DRB1*15:01	0.00649351		A*02:206~B*15:16~C*16:01g~DRB1*01:02	3.84232e-05
DQB1*04:04~DRB1*03:02	0.00367647		B*35:08~C*04:01g~DRB1*11:02	0.00649351		A*02:221~B*15:16~C*16:01g~DRB1*01:02	3.84232e-05
DQB1*06:11~DRB1*13:01	0.00367647		B*35:01g~C*04:01g~DRB1*12:01	0.00649351		A*02:222N~B*15:16~C*16:01g~DRB1*01:02	3.84232e-05
A*30:01g~B*35:01g	0.00367406		B*58:02~C*06:02g~DRB1*04:05	0.00649351		A*02:223N~B*15:16~C*16:01g~DRB1*01:02	3.84232e-05
A*43:01~DRB1*04:01	0.00363373		B*07:02g~C*07:02g~DRB1*07:01	0.00649351		A*02:225N~B*15:16~C*16:01g~DRB1*01:02	3.84232e-05
B*15:03g~DRB1*11:01	0.00362123		B*58:02~C*06:02g~DRB1*04:04	0.00649351		A*02:227N~B*15:16~C*16:01g~DRB1*01:02	3.84232e-05
B*40:06~DRB1*14:04	0.003607		B*18:01g~C*07:02g~DRB1*15:02	0.00649351		A*02:228~B*15:16~C*16:01g~DRB1*01:02	3.84232e-05
B*52:01g~DRB1*15:02	0.003607		B*56:01g~C*01:02g~DRB1*01:01	0.00649351		A*02:231~B*15:16~C*16:01g~DRB1*01:02	3.84232e-05
A*02:01g~B*18:01g	0.00359058		B*38:01~C*12:03g~DRB1*04:02	0.00649351		A*02:233~B*15:16~C*16:01g~DRB1*01:02	3.84232e-05
B*38:01~DQB1*06:40	0.00357143		B*40:02g~C*02:02g~DRB1*04:07	0.00649351		A*02:198~B*15:16~C*16:01g~DRB1*01:02	3.84232e-05
B*38:01~DQB1*06:11	0.00357143		B*49:01g~C*07:01g~DRB1*15:01	0.00649351		A*02:187~B*15:16~C*16:01g~DRB1*01:02	3.84232e-05
B*57:01g~DQB1*03:30	0.00357143		B*51:01g~C*01:02g~DRB1*13:01	0.00649346		A*02:188~B*15:16~C*16:01g~DRB1*01:02	3.84232e-05
B*42:01~DQB1*04:04	0.00357143		A*02:11g~C*15:02g~DRB1*15:01	0.00632914		A*02:189~B*15:16~C*16:01g~DRB1*01:02	3.84232e-05
B*53:01g~DRB1*09:01	0.00355299		A*68:02g~C*17:01g~DRB1*03:02	0.00632912		A*02:190~B*15:16~C*16:01g~DRB1*01:02	3.84232e-05
B*56:01g~DRB1*15:01	0.00352726		A*11:01g~C*04:01g~DRB1*01:01	0.00632912		A*02:192~B*15:16~C*16:01g~DRB1*01:02	3.84232e-05
A*68:02g~DRB1*11:02	0.00348748		A*68:02g~C*03:04g~DRB1*03:01	0.00632912		A*02:193~B*15:16~C*16:01g~DRB1*01:02	3.84232e-05
A*02:01g~B*45:01g	0.00347533		A*03:01g~C*01:02g~DRB1*01:01	0.00632912		A*02:196~B*15:16~C*16:01g~DRB1*01:02	3.84232e-05
A*01:01g~DQB1*03:30	0.00347222		A*03:01g~C*04:01g~DRB1*01:01	0.00632912		A*02:197~B*15:16~C*16:01g~DRB1*01:02	3.84232e-05
A*30:01g~DQB1*04:04	0.00347222		A*26:01g~C*05:01g~DRB1*15:03	0.00632912		A*02:101~B*15:16~C*16:01g~DRB1*01:02	3.84232e-05
A*26:01g~DQB1*06:40	0.00347222		A*30:02g~C*03:02g~DRB1*03:01	0.00632912		A*02:199~B*15:16~C*16:01g~DRB1*01:02	3.84232e-05
A*26:01g~DQB1*06:11	0.00347222		A*24:02g~C*02:02g~DRB1*13:03	0.00632912		A*02:20~B*15:16~C*16:01g~DRB1*01:02	3.84232e-05
A*66:01g~B*58:60	0.00345307		A*02:01g~C*07:01g~DRB1*11:04	0.00632912		A*02:200~B*15:16~C*16:01g~DRB1*01:02	3.84232e-05
A*02:02~B*57:03	0.00345307		A*24:02g~C*12:03g~DRB1*12:02	0.00632912		A*02:201~B*15:16~C*16:01g~DRB1*01:02	3.84232e-05
A*23:01g~DRB1*15:01	0.00340233		A*69:01~C*12:03g~DRB1*14:01	0.00632912		A*02:202~B*15:16~C*16:01g~DRB1*01:02	3.84232e-05
B*35:01g~DRB1*04:05	0.00327036		A*11:01g~C*08:01g~DRB1*13:02	0.00632912		A*02:203~B*15:16~C*16:01g~DRB1*01:02	3.84232e-05
B*15:10~DRB1*13:02	0.00327036		A*24:02g~C*07:01g~DRB1*12:02	0.00632912		A*02:204~B*15:16~C*16:01g~DRB1*01:02	3.84232e-05
B*58:02~DRB1*04:04	0.00323238		A*30:04g~C*07:01g~DRB1*11:01	0.00632912		A*02:205~B*15:16~C*16:01g~DRB1*01:02	3.84232e-05
A*34:02~B*44:207	0.00317682		A*23:01g~C*04:01g~DRB1*11:04	0.00632912		A*68:02g~C*02:02g~DQB1*06:200~DRB1*13:190	9.07721e-06
A*34:02~B*44:193	0.00317682		A*25:01g~C*07:01g~DRB1*03:01	0.00632912		A*68:02g~C*02:02g~DQB1*06:227~DRB1*13:190	9.07721e-06
A*34:02~B*44:198N	0.00317682		A*26:01g~C*04:01g~DRB1*08:04	0.00632912		A*68:02g~C*02:02g~DQB1*06:117~DRB1*13:233	9.07721e-06
C*07:15~DRB1*14:54	0.00316456		A*30:02g~C*08:02g~DRB1*15:03	0.00632912		A*68:02g~C*02:02g~DQB1*06:109~DRB1*13:233	9.07721e-06
C*07:02g~DRB1*14:54	0.00316301		A*23:01g~C*18:01g~DRB1*13:01	0.00632912		A*68:02g~C*02:02g~DQB1*06:111~DRB1*13:233	9.07721e-06
A*11:01g~DRB1*15:01	0.00313883		A*33:01g~C*08:02g~DRB1*01:02	0.00632912		A*68:02g~C*02:02g~DQB1*06:84~DRB1*13:190	9.07721e-06
A*03:01g~B*35:01g	0.00313832		A*01:01g~C*12:03g~DRB1*07:01	0.00632912		A*68:02g~C*02:02g~DQB1*06:117~DRB1*13:190	9.07721e-06
A*02:01g~B*27:05g	0.003138		A*02:01g~C*03:03g~DRB1*04:02	0.00632912		A*68:02g~C*02:02g~DQB1*06:200~DRB1*13:215	9.07721e-06
A*23:01g~DRB1*11:02	0.00311463		A*32:01g~C*07:02g~DRB1*10:01	0.00632912		A*68:02g~C*02:02g~DQB1*06:116~DRB1*13:190	9.07721e-06
B*57:03~DRB1*13:01	0.00306849		A*24:02g~C*15:02g~DRB1*04:05	0.00632912		A*68:02g~C*02:02g~DQB1*06:111~DRB1*13:190	9.07721e-06
A*66:01g~DRB1*13:02	0.00303337		A*43:01~C*18:01g~DRB1*11:02	0.00632912		A*68:02g~C*02:02g~DQB1*06:219~DRB1*13:215	9.07721e-06
A*11:01g~B*15:01g	0.00302393		A*68:02g~C*14:02g~DRB1*15:02	0.00632912		A*68:02g~C*02:02g~DQB1*06:226~DRB1*13:190	9.07721e-06
A*02:05g~DRB1*12:01	0.00302297		A*30:02g~C*03:04g~DRB1*13:02	0.00632912		A*68:02g~C*02:02g~DQB1*06:228~DRB1*13:190	9.07721e-06
B*07:02g~DRB1*07:01	0.00300158		A*31:01g~C*07:04g~DRB1*01:01	0.00632912		A*68:02g~C*02:02g~DQB1*06:84~DRB1*13:215	9.07721e-06
B*44:03~DRB1*15:01	0.00300151		A*68:01g~C*05:01g~DRB1*08:01	0.00632912		A*68:02g~C*02:02g~DQB1*06:109~DRB1*13:215	9.07721e-06
A*34:02~B*44:03	0.00298103		A*02:11g~C*07:02g~DRB1*03:01	0.00632912		A*68:02g~C*02:02g~DQB1*06:109~DRB1*13:117	9.07721e-06
A*23:01g~B*07:02g	0.00296665		A*24:07~C*01:02g~DRB1*14:04	0.00632912		A*68:02g~C*02:02g~DQB1*06:111~DRB1*13:215	9.07721e-06
B*08:01g~DRB1*15:01	0.00295748		A*24:02g~C*03:03g~DRB1*04:04	0.00632912		A*68:02g~C*02:02g~DQB1*06:226~DRB1*13:215	9.07721e-06
A*74:01g~DRB1*13:03	0.0029339		A*32:01g~C*04:01g~DRB1*04:03	0.00632912		A*68:02g~C*02:02g~DQB1*06:47~DRB1*13:215	9.07721e-06
B*58:02~DRB1*12:01	0.00290825		A*11:01g~C*05:01g~DRB1*13:01	0.00632912		A*68:02g~C*02:02g~DQB1*06:219~DRB1*13:190	9.07721e-06
A*02:01g~DRB1*15:03	0.00290815		A*24:02g~C*03:04g~DRB1*04:01	0.00632912		A*68:02g~C*02:02g~DQB1*06:188~DRB1*13:190	9.07721e-06
B*51:01g~DRB1*13:01	0.00290699		A*03:01g~C*14:02g~DRB1*15:01	0.00632912		A*68:02g~C*02:02g~DQB1*06:116~DRB1*13:233	9.07721e-06
B*51:01g~DRB1*08:03	0.00290699		A*30:01g~C*06:02g~DRB1*09:01	0.00632912		A*68:02g~C*02:02g~DQB1*06:224~DRB1*13:233	9.07721e-06
B*51:01g~DRB1*11:01	0.00290699		A*36:01~C*04:01g~DRB1*01:02	0.00632912		A*68:02g~C*02:02g~DQB1*06:226~DRB1*13:233	9.07721e-06
B*51:01g~DRB1*14:54	0.00290699		A*24:02g~C*06:02g~DRB1*04:01	0.00632912		A*68:02g~C*02:02g~DQB1*06:227~DRB1*13:233	9.07721e-06
B*44:02g~DRB1*12:01	0.00290699		A*29:02g~C*02:02g~DRB1*13:01	0.00632912		A*68:02g~C*02:02g~DQB1*06:228~DRB1*13:233	9.07721e-06
B*37:01g~DRB1*11:01	0.00290699		A*03:01g~C*18:01g~DRB1*13:02	0.00632912		A*68:02g~C*02:02g~DQB1*06:47~DRB1*13:233	9.07721e-06
B*13:02g~DRB1*04:01	0.00290699		A*02:01g~C*07:01g~DRB1*01:01	0.00632912		A*68:02g~C*02:02g~DQB1*06:188~DRB1*13:215	9.07721e-06
B*15:01g~DRB1*14:04	0.00290699		A*02:05g~C*05:01g~DRB1*11:02	0.00632912		A*68:02g~C*02:02g~DQB1*06:117~DRB1*13:215	9.07721e-06
B*44:02g~DRB1*04:01	0.00290699		A*31:01g~C*03:03g~DRB1*15:01	0.00632912		A*68:02g~C*02:02g~DQB1*06:228~DRB1*13:215	9.07721e-06
B*40:06~DRB1*10:01	0.00290699		A*32:01g~C*12:03g~DRB1*11:04	0.00632912		A*68:02g~C*02:02g~DQB1*06:227~DRB1*13:215	9.07721e-06
B*07:02g~DRB1*04:05	0.00290699		A*29:02g~C*07:02g~DRB1*13:01	0.00632912		A*68:02g~C*02:02g~DQB1*06:224~DRB1*13:215	9.07721e-06
B*27:05g~DRB1*08:01	0.00290699		A*02:01g~C*15:05g~DRB1*10:01	0.00632912		A*68:02g~C*02:02g~DQB1*06:116~DRB1*13:215	9.07721e-06
B*07:05g~DRB1*04:10	0.00290699		A*29:02g~C*16:01g~DRB1*15:01	0.00632912		A*68:02g~C*02:02g~DQB1*06:219~DRB1*13:233	9.07721e-06
B*18:02~DRB1*12:01	0.00290699		A*23:01g~C*07:02g~DRB1*15:03	0.00632912		A*68:02g~C*02:02g~DQB1*06:225~DRB1*13:215	9.07721e-06
B*14:02~DRB1*04:03	0.00290699		A*69:01~C*12:03g~DRB1*14:54	0.00632912		A*68:02g~C*02:02g~DQB1*06:127~DRB1*13:215	9.07721e-06
B*38:01~DRB1*04:02	0.00290699		A*26:01g~C*14:02g~DRB1*08:03	0.00632912		A*68:02g~C*02:02g~DQB1*06:188~DRB1*13:117	9.07721e-06
B*51:02~DRB1*12:02	0.00290699		A*68:01g~C*07:02g~DRB1*03:01	0.00632912		A*68:02g~C*02:02g~DQB1*06:224~DRB1*13:117	9.07721e-06
B*35:08~DRB1*11:02	0.00290699		A*24:02g~C*07:26~DRB1*04:10	0.00632912		A*68:02g~C*02:02g~DQB1*06:116~DRB1*13:117	9.07721e-06
B*15:32~DRB1*12:02	0.00290699		A*68:01g~C*07:01g~DRB1*03:01	0.00632912		A*68:02g~C*02:02g~DQB1*06:226~DRB1*13:117	9.07721e-06
B*35:08~DRB1*14:54	0.00290699		A*02:06g~C*15:02g~DRB1*14:04	0.00632912		A*68:02g~C*02:02g~DQB1*06:227~DRB1*13:117	9.07721e-06
B*15:10~DRB1*08:04	0.00290699		A*03:01g~C*02:02g~DRB1*04:08	0.00632912		A*68:02g~C*02:02g~DQB1*06:228~DRB1*13:117	9.07721e-06
B*50:01g~DRB1*01:02	0.00290699		A*02:01g~C*12:02g~DRB1*15:02	0.00632912		A*68:02g~C*02:02g~DQB1*06:47~DRB1*13:117	9.07721e-06
B*50:01g~DRB1*14:01	0.00290699		A*31:01g~C*02:02g~DRB1*04:07	0.00632912		A*68:02g~C*02:02g~DQB1*06:117~DRB1*13:117	9.07721e-06
B*53:01g~DRB1*08:04	0.00290699		A*68:01g~C*15:02g~DRB1*04:01	0.00632912		A*68:02g~C*02:02g~DQB1*06:84~DRB1*13:117	9.07721e-06
B*35:02g~DRB1*08:01	0.00290699		A*68:01g~C*06:02g~DRB1*04:04	0.00632912		A*68:02g~C*02:02g~DQB1*06:127~DRB1*13:117	9.07721e-06
B*45:01g~DRB1*13:03	0.00290699		A*01:01g~C*05:01g~DRB1*04:01	0.00632912		A*68:02g~C*02:02g~DQB1*06:225~DRB1*13:117	9.07721e-06
B*38:01~DRB1*10:01	0.00290699		A*33:03g~C*04:01g~DRB1*08:04	0.00632912		A*68:02g~C*02:02g~DQB1*06:219~DRB1*13:117	9.07721e-06
B*07:05g~DRB1*04:05	0.00290699		A*03:01g~C*06:02g~DRB1*13:01	0.00632912		A*68:02g~C*02:02g~DQB1*06:200~DRB1*13:117	9.07721e-06
B*07:05g~DRB1*11:04	0.00290699		A*66:01g~C*07:01g~DRB1*13:02	0.00632912		A*68:02g~C*02:02g~DQB1*06:84~DRB1*13:233	9.07721e-06
B*52:01g~DRB1*11:04	0.00290699		A*33:03g~C*14:02g~DRB1*11:17	0.00632912		A*68:02g~C*02:02g~DQB1*06:47~DRB1*13:190	9.07721e-06
B*35:05~DRB1*15:02	0.00290699		A*01:01g~C*12:02g~DRB1*08:01	0.00632912		A*68:02g~C*02:02g~DQB1*06:224~DRB1*13:190	9.07721e-06
B*42:02~DRB1*13:02	0.00290699		A*11:01g~C*04:01g~DRB1*11:04	0.00632912		A*68:02g~C*02:02g~DQB1*06:109~DRB1*13:190	9.07721e-06
B*42:01~DRB1*10:01	0.00290699		A*03:01g~C*02:02g~DRB1*14:54	0.00632912		A*68:02g~C*02:02g~DQB1*06:127~DRB1*13:190	9.07721e-06
B*41:01~DRB1*07:01	0.00290699		A*30:01g~C*06:02g~DRB1*07:01	0.00632912		A*68:02g~C*02:02g~DQB1*06:225~DRB1*13:190	9.07721e-06
B*57:02~DRB1*13:02	0.00290699		A*11:01g~C*15:02g~DRB1*15:01	0.00632912		A*68:02g~C*02:02g~DQB1*06:188~DRB1*13:233	9.07721e-06
B*81:01g~DRB1*11:02	0.00290699		A*02:01g~C*06:02g~DRB1*12:01	0.00632912		A*68:02g~C*02:02g~DQB1*06:200~DRB1*13:233	9.07721e-06
B*57:03~DRB1*01:02	0.00290699		A*02:05g~C*03:04g~DRB1*15:03	0.00632912		A*68:02g~C*02:02g~DQB1*06:111~DRB1*13:117	9.07721e-06
B*07:05g~DRB1*15:01	0.00290699		A*03:01g~C*03:02g~DRB1*11:01	0.00632912		A*68:02g~C*02:02g~DQB1*06:225~DRB1*13:233	9.07721e-06
B*15:16~DRB1*15:02	0.00290699		A*02:01g~C*07:02g~DRB1*11:02	0.00632912		A*68:02g~C*02:02g~DQB1*06:127~DRB1*13:233	9.07721e-06
B*15:18g~DRB1*04:01	0.00290699		A*01:01g~C*04:01g~DRB1*01:01	0.00632912		A*11:01g~C*01:02g~DQB1*05:01~DRB1*01:01	2.8507e-06
B*27:05g~DRB1*04:08	0.00290699		A*11:01g~C*07:02g~DRB1*15:02	0.00632912
B*81:01g~DRB1*08:04	0.00290699		A*02:01g~C*01:02g~DRB1*13:01	0.00632912
B*15:17~DRB1*13:02	0.00290699		A*30:01g~C*06:02g~DRB1*04:05	0.00632912
B*49:01g~DRB1*15:01	0.00290699		A*68:01g~C*04:01g~DRB1*12:01	0.00632912
B*35:08~DRB1*14:01	0.00290699		A*11:01g~C*04:01g~DRB1*04:01	0.00632912
B*38:02g~DRB1*15:02	0.00290699		A*68:02g~C*08:02g~DRB1*07:01	0.00632912
B*38:01~DRB1*13:01	0.00290699		A*23:01g~C*07:01g~DRB1*15:01	0.00632911
B*40:01g~DRB1*13:02	0.00290699		A*24:03g~C*07:02g~DRB1*15:01	0.00632911
B*40:02g~DRB1*04:07	0.00290699		A*30:02g~B*58:01g~DRB1*15:03	0.00608772
B*15:01g~DRB1*01:01	0.00290699		A*68:02g~C*07:02g~DQB1*06:02	0.00597048
B*49:01g~DRB1*11:04	0.00290699		A*24:02g~B*07:02g~DRB1*15:01	0.00591849
B*14:02~DRB1*13:01	0.00290699		A*23:01g~C*02:02g~DQB1*06:03	0.00588235
B*40:01g~DRB1*04:04	0.00290699		A*02:01g~B*44:02g~C*05:01g	0.00581462
B*40:03g~DRB1*09:01	0.00290699		A*30:01g~B*14:01~C*17:01g	0.00581396
B*46:01g~DRB1*14:05	0.00290699		A*11:01g~B*15:01g~C*03:03g	0.00581396
B*40:06~DRB1*15:01	0.00290699		A*68:02g~B*42:01~C*17:01g	0.00581396
B*35:03g~DRB1*07:01	0.00290699		A*25:01g~B*08:01g~C*07:01g	0.00581396
B*27:05g~DRB1*13:03	0.00290699		A*30:02g~B*58:01g~C*03:02g	0.00581396
B*40:02g~DRB1*11:01	0.00290699		A*26:01g~B*18:01g~C*05:01g	0.00581396
B*35:03g~DRB1*14:04	0.00290699		A*24:02g~B*15:02g~C*07:01g	0.00581396
B*35:08~DRB1*11:04	0.00290699		A*11:01g~B*15:17~C*08:01g	0.00581396
B*44:29~DRB1*13:01	0.00290699		A*02:01g~B*27:05g~C*02:02g	0.00581396
B*27:04g~DRB1*11:01	0.00290699		A*24:02g~B*18:01g~C*07:01g	0.00581396
B*39:01g~DRB1*11:01	0.00290699		A*03:01g~B*15:01g~C*14:02g	0.00581396
B*07:02g~DRB1*13:01	0.00290699		A*24:02g~B*51:01g~C*03:04g	0.00581396
A*03:01g~DRB1*13:02	0.00290698		A*43:01~B*42:02~C*08:04	0.00581396
A*24:02g~DRB1*04:01	0.00290698		A*26:01g~B*15:01g~C*03:03g	0.00581396
A*30:02g~DRB1*11:04	0.00290698		A*30:04g~B*15:03g~C*04:01g	0.00581396
A*26:01g~DRB1*08:04	0.00290698		A*32:01g~B*40:06~C*15:02g	0.00581396
A*26:01g~DRB1*03:01	0.00290698		A*26:01g~B*81:01g~C*04:01g	0.00581396
A*24:02g~DRB1*04:05	0.00290698		A*30:02g~B*14:02~C*08:02g	0.00581396
A*36:01~DRB1*09:01	0.00290698		A*68:01g~B*44:02g~C*05:01g	0.00581396
A*24:03g~DRB1*15:01	0.00290698		A*24:02g~B*07:05g~C*07:02g	0.00581396
A*24:07~DRB1*03:01	0.00290698		A*32:01g~B*41:01~C*17:01g	0.00581396
A*69:01~DRB1*14:01	0.00290698		A*31:01g~B*27:05g~C*07:04g	0.00581396
A*30:01g~DRB1*01:02	0.00290698		A*02:11g~B*08:01g~C*07:02g	0.00581396
A*33:03g~DRB1*14:04	0.00290698		A*24:07~B*15:01g~C*01:02g	0.00581396
A*24:17~DRB1*12:02	0.00290698		A*23:01g~B*57:03~C*18:01g	0.00581396
A*24:03g~DRB1*11:04	0.00290698		A*03:01g~B*35:03g~C*04:01g	0.00581396
A*29:01~DRB1*08:04	0.00290698		A*24:02g~B*37:01g~C*06:02g	0.00581396
A*11:01g~DRB1*13:02	0.00290698		A*30:02g~B*45:01g~C*16:01g	0.00581396
A*02:02~DRB1*01:02	0.00290698		A*24:02g~B*15:24~C*03:03g	0.00581396
A*26:01g~DRB1*08:03	0.00290698		A*68:02g~B*15:16~C*14:02g	0.00581396
A*30:04g~DRB1*11:04	0.00290698		A*43:01~B*81:01g~C*18:01g	0.00581396
A*43:01~DRB1*15:02	0.00290698		A*32:01g~B*15:01g~C*04:01g	0.00581396
A*32:01g~DRB1*04:03	0.00290698		A*24:02g~B*07:05g~C*15:05g	0.00581396
A*32:01g~DRB1*04:01	0.00290698		A*01:01g~B*35:03g~C*12:03g	0.00581396
A*24:02g~DRB1*04:10	0.00290698		A*26:01g~B*51:01g~C*14:02g	0.00581396
A*68:01g~DRB1*04:05	0.00290698		A*31:01g~B*07:02g~C*07:02g	0.00581396
A*02:01g~DRB1*09:01	0.00290698		A*68:01g~B*08:01g~C*07:02g	0.00581396
A*24:02g~DRB1*14:05	0.00290698		A*29:02g~B*15:01g~C*03:03g	0.00581396
A*24:02g~DRB1*13:03	0.00290698		A*30:01g~B*53:01g~C*04:01g	0.00581396
A*68:02g~DRB1*04:04	0.00290698		A*36:01~B*50:01g~C*06:02g	0.00581396
A*68:01g~DRB1*14:01	0.00290698		A*74:01g~B*15:03g~C*02:02g	0.00581396
A*02:11g~DRB1*04:03	0.00290698		A*68:01g~B*08:01g~C*07:01g	0.00581396
A*31:01g~DRB1*08:01	0.00290698		A*24:17~B*58:01g~C*03:02g	0.00581396
A*68:01g~DRB1*01:01	0.00290698		A*32:01g~B*07:05g~C*15:05g	0.00581396
A*24:07~DRB1*15:02	0.00290698		A*03:01g~B*35:01g~C*04:01g	0.00581396
A*25:01g~DRB1*11:04	0.00290698		A*26:01g~B*40:01g~C*03:04g	0.00581396
A*02:11g~DRB1*15:01	0.00290698		A*03:01g~B*57:02~C*18:01g	0.00581396
A*02:02~DRB1*08:04	0.00290698		A*29:02g~B*40:02g~C*05:01g	0.00581396
A*25:01g~DRB1*03:01	0.00290698		A*02:01g~B*44:29~C*02:02g	0.00581396
A*26:01g~DRB1*13:02	0.00290698		A*02:06g~B*13:02g~C*06:02g	0.00581396
A*26:01g~DRB1*04:02	0.00290698		A*30:01g~B*35:01g~C*04:01g	0.00581396
A*29:02g~DRB1*01:01	0.00290698		A*01:01g~B*27:05g~C*05:01g	0.00581396
A*31:01g~DRB1*04:07	0.00290698		A*03:01g~B*44:02g~C*01:02g	0.00581396
A*02:06g~DRB1*14:04	0.00290698		A*03:01g~B*57:01g~C*06:02g	0.00581396
A*68:01g~DRB1*11:01	0.00290698		A*24:07~B*07:02g~C*07:02g	0.00581396
A*01:01g~DRB1*04:01	0.00290698		A*23:01g~B*44:03~C*04:01g	0.00581396
A*68:01g~DRB1*15:02	0.00290698		A*03:01g~B*35:01g~C*02:02g	0.00581396
A*11:01g~DRB1*08:01	0.00290698		A*66:01g~B*50:01g~C*06:02g	0.00581396
A*01:01g~DRB1*11:04	0.00290698		A*30:01g~B*13:02g~C*06:02g	0.00581396
A*03:01g~DRB1*04:05	0.00290698		A*68:01g~B*15:18g~C*07:04g	0.00581396
A*03:01g~DRB1*04:08	0.00290698		A*03:01g~B*58:02~C*04:01g	0.00581396
B*35:01g~C*07:15	0.00290698		A*33:03g~B*53:01g~C*06:02g	0.00581396
B*35:01g~C*07:02g	0.00290698		A*03:01g~B*27:05g~C*02:02g	0.00581396
B*58:02~DRB1*13:117	0.00290559		A*31:01g~B*40:02g~C*02:02g	0.00581396
C*06:02g~DQB1*03:30	0.00288462		A*33:03g~B*15:16~C*14:02g	0.00581396
C*17:01g~DQB1*04:02	0.00288462		A*02:01g~B*35:01g~C*04:01g	0.00581396
A*03:01g~DRB1*09:21	0.00286526		A*11:01g~B*51:01g~C*15:02g	0.00581396
A*03:01g~DRB1*09:01	0.00286526		A*02:05g~B*44:02g~C*06:02g	0.00581396
A*03:01g~C*07:15	0.00284091		A*01:01g~B*35:02g~C*04:01g	0.00581396
A*03:01g~B*14:02	0.00282006		A*02:01g~B*51:01g~C*01:02g	0.00581396
A*30:01g~B*13:02g	0.00281268		A*03:01g~B*15:10~C*03:02g	0.00581396
A*33:03g~B*15:10	0.00281023		A*23:01g~B*35:08~C*04:01g	0.00581396
A*43:01~B*58:60	0.0027625		A*11:01g~B*56:01g~C*01:02g	0.00581396
A*43:01~B*58:02	0.0027625		A*02:01g~B*15:01g~C*07:04g	0.00581396
A*24:07~B*51:02	0.00276245		A*11:01g~B*18:01g~C*04:01g	0.00581396
A*24:02g~B*44:03	0.00276245		A*11:01g~B*35:01g~C*04:01g	0.00581396
A*24:02g~B*40:01g	0.00276245		A*11:01g~B*18:01g~C*07:02g	0.00581396
A*32:01g~B*40:06	0.00276245		A*02:01g~B*07:05g~C*07:26	0.00581396
A*32:01g~B*41:01	0.00276245		A*11:01g~B*15:32~C*12:03g	0.00581396
A*02:11g~B*15:01g	0.00276245		A*68:02g~B*14:01~C*08:02g	0.00581396
A*24:07~B*08:01g	0.00276245		A*02:05g~B*44:02g~C*05:01g	0.00581329
A*26:01g~B*51:01g	0.00276245		C*02:02g~DQB1*06:02~DRB1*15:03	0.0053374
A*26:01g~B*14:02	0.00276245		A*68:02g~C*02:02g~DRB1*13:01	0.00512357
A*36:01~B*50:01g	0.00276245		A*02:05g~B*58:01g~DRB1*11:02	0.00487018
A*30:02g~B*39:01g	0.00276245		A*68:02g~DQB1*06:02~DRB1*15:03	0.00478796
A*26:01g~B*18:01g	0.00276245		A*23:01g~DQB1*06:03~DRB1*13:01	0.00455182
A*29:02g~B*15:01g	0.00276245		A*30:02g~B*42:01~DRB1*03:02	0.00432905
A*31:01g~B*07:02g	0.00276245		C*03:03g~DQB1*06:40~DRB1*13:01	0.00409836
A*11:01g~B*15:32	0.00276245		C*12:03g~DQB1*06:11~DRB1*13:01	0.00409836
A*24:02g~B*37:01g	0.00276245		C*17:01g~DQB1*04:04~DRB1*03:02	0.00409836
A*43:01~B*14:01	0.00276245		C*06:02g~DQB1*03:30~DRB1*07:01	0.00409836
A*11:01g~B*15:02g	0.00276245		B*38:01~C*12:03g~DQB1*06:40	0.00390625
A*24:02g~B*15:17	0.00276245		B*38:01~C*12:03g~DQB1*06:11	0.00390625
A*30:02g~B*14:02	0.00276245		B*57:01g~C*06:02g~DQB1*03:30	0.00390625
A*74:18~B*15:03g	0.00276245		B*42:01~C*17:01g~DQB1*04:04	0.00390625
A*30:02g~B*57:03	0.00276245		A*02:01g~C*12:03g~DQB1*06:40	0.00384615
A*23:01g~B*14:01	0.00276245		A*02:01g~C*12:03g~DQB1*06:11	0.00384615
A*03:01g~B*35:03g	0.00276245		A*01:01g~C*06:02g~DQB1*03:30	0.00384615
A*24:02g~B*15:24	0.00276245		A*30:01g~C*17:01g~DQB1*04:04	0.00384615
A*11:01g~B*18:02	0.00276245		A*24:02g~B*07:02g~DRB1*03:01	0.00382187
A*30:04g~B*15:03g	0.00276245		A*01:01g~B*08:01g~DRB1*15:01	0.00382187
A*25:01g~B*08:01g	0.00276245		B*15:01g~DQB1*06:40~DRB1*13:01	0.00378788
A*68:01g~B*44:02g	0.00276245		B*38:01~DQB1*06:03~DRB1*13:01	0.00378788
A*33:03g~B*35:08	0.00276245		B*38:01~DQB1*06:11~DRB1*13:01	0.00378788
A*24:03g~B*35:03g	0.00276245		B*57:01g~DQB1*03:30~DRB1*07:01	0.00378788
A*29:02g~B*50:01g	0.00276245		B*42:01~DQB1*04:04~DRB1*03:02	0.00378788
A*24:07~B*07:02g	0.00276245		A*01:01g~DQB1*03:30~DRB1*07:01	0.00367647
A*02:01g~B*40:03g	0.00276245		A*30:01g~DQB1*04:04~DRB1*03:02	0.00367647
A*24:02g~B*46:01g	0.00276245		A*26:01g~DQB1*06:11~DRB1*13:01	0.00367647
A*33:03g~B*53:01g	0.00276245		A*26:01g~DQB1*06:40~DRB1*13:01	0.00367647
A*02:02~B*15:10	0.00276245		A*26:01g~B*38:01~DQB1*06:40	0.00357143
A*25:01g~B*18:01g	0.00276245		A*26:01g~B*38:01~DQB1*06:11	0.00357143
A*02:06g~B*40:06	0.00276245		A*30:01g~B*42:01~DQB1*04:04	0.00357143
A*01:01g~B*41:01	0.00276245		A*01:01g~B*57:01g~DQB1*03:30	0.00357143
A*66:02~B*42:01	0.00276245		A*68:02g~B*07:02g~DRB1*15:03	0.00354895
A*01:01g~B*35:03g	0.00276245		A*30:01g~B*42:02~DRB1*12:01	0.00350653
A*11:01g~B*38:02g	0.00276245		A*74:01g~B*57:03~DRB1*13:03	0.00342716
A*02:01g~B*40:01g	0.00276245		A*68:02g~B*15:10~DRB1*03:01	0.00342716
A*66:01g~B*50:01g	0.00276245		A*23:01g~B*15:03g~DRB1*11:01	0.00337961
A*03:01g~B*57:02	0.00276245		A*29:02g~B*58:02~DRB1*13:01	0.00332077
A*31:01g~B*40:02g	0.00276245		A*02:11g~B*40:06~DRB1*15:02	0.00324679
A*03:01g~B*57:01g	0.00276245		A*24:07~B*35:05~DRB1*15:02	0.00324679
A*24:17~B*58:01g	0.00276245		A*03:01g~B*35:01g~DRB1*01:01	0.00324679
A*31:01g~B*51:01g	0.00276245		A*24:07~B*44:03~DRB1*15:03	0.00324679
A*23:01g~B*35:08	0.00276245		A*24:02g~B*51:02~DRB1*12:02	0.00324679
A*01:01g~B*44:02g	0.00276245		A*24:02g~B*15:01g~DRB1*15:01	0.00324679
A*11:01g~B*56:01g	0.00276245		A*24:02g~B*07:02g~DRB1*10:01	0.00324679
A*32:01g~B*38:01	0.00276245		A*24:02g~B*40:01g~DRB1*04:04	0.00324679
A*02:01g~B*40:06	0.00276245		A*24:02g~B*07:05g~DRB1*15:01	0.00324679
A*68:01g~B*15:18g	0.00276245		A*32:01g~B*40:06~DRB1*04:05	0.00324679
A*68:01g~B*27:04g	0.00276245		A*26:01g~B*51:01g~DRB1*08:03	0.00324679
A*01:01g~B*35:02g	0.00276245		A*02:11g~B*15:01g~DRB1*03:01	0.00324679
A*29:02g~B*40:02g	0.00276245		A*24:07~B*08:01g~DRB1*14:04	0.00324679
A*03:01g~B*15:10	0.00276245		A*26:01g~B*81:01g~DRB1*08:04	0.00324679
A*02:01g~B*44:29	0.00276245		A*36:01~B*53:01g~DRB1*01:02	0.00324679
A*30:02g~DRB1*11:02	0.00269934		A*30:01g~B*50:01g~DRB1*09:01	0.00324679
A*29:02g~DRB1*13:02	0.00267565		A*30:02g~B*39:01g~DRB1*11:01	0.00324679
A*23:01g~DRB1*07:01	0.00266594		A*26:01g~B*18:01g~DRB1*03:01	0.00324679
A*68:02g~DRB1*07:01	0.00260791		A*24:02g~B*15:32~DRB1*12:02	0.00324679
A*29:02g~B*44:199	0.0025476		A*29:02g~B*15:01g~DRB1*15:01	0.00324679
A*30:25~DRB1*15:03	0.00254414		A*31:01g~B*07:02g~DRB1*13:01	0.00324679
A*74:01g~DRB1*13:02	0.0025417		A*69:01~B*35:08~DRB1*14:01	0.00324679
A*68:02g~B*07:02g	0.00252332		A*24:02g~B*37:01g~DRB1*11:01	0.00324679
B*58:60~DRB1*15:03	0.00244135		A*02:01g~B*44:02g~DRB1*04:01	0.00324679
B*81:01g~DRB1*15:03	0.00242082		A*30:01g~B*13:02g~DRB1*07:01	0.00324679
A*34:02~B*08:01g	0.00241715		A*32:01g~B*15:01g~DRB1*04:01	0.00324679
A*23:01g~B*08:01g	0.0024007		A*24:02g~B*07:05g~DRB1*04:01	0.00324679
C*08:04~DRB1*01:02	0.00237342		A*02:01g~B*07:02g~DRB1*04:10	0.00324679
C*12:03g~DQB1*03:02	0.00237192		A*32:01g~B*15:01g~DRB1*04:03	0.00324679
B*15:16~DRB1*15:03	0.00237108		A*68:02g~B*15:10~DRB1*13:02	0.00324679
A*66:01g~DRB1*11:01	0.00234625		A*11:01g~B*18:01g~DRB1*13:01	0.00324679
B*58:02~DRB1*07:34	0.00233873		A*23:01g~B*44:03~DRB1*07:01	0.00324679
C*07:01g~DQB1*06:02	0.00231311		A*29:02g~B*42:02~DRB1*13:02	0.00324679
B*58:02~DRB1*07:01	0.00231031		A*30:02g~B*14:01~DRB1*07:01	0.00324679
B*07:02g~DRB1*03:02	0.00230082		A*43:01~B*15:16~DRB1*11:02	0.00324679
B*56:01g~DRB1*01:01	0.00228672		A*23:01g~B*57:03~DRB1*13:01	0.00324679
A*29:02g~B*81:01g	0.0022554		A*68:02g~B*81:01g~DRB1*15:02	0.00324679
A*74:01g~DRB1*13:128	0.00223614		A*24:02g~B*15:17~DRB1*12:02	0.00324679
B*07:02g~DRB1*03:01	0.00223073		A*11:01g~B*15:02g~DRB1*13:02	0.00324679
A*30:02g~DRB1*03:01	0.00221802		A*02:02~B*57:03~DRB1*01:02	0.00324679
A*68:02g~DRB1*13:128	0.00218024		A*24:03g~B*35:03g~DRB1*11:04	0.00324679
A*29:02g~DRB1*03:02	0.00215604		A*68:01g~B*44:02g~DRB1*08:01	0.00324679
A*24:17~B*15:02g	0.00207184		A*31:01g~B*27:05g~DRB1*01:01	0.00324679
A*66:01g~B*15:10	0.00207184		A*33:03g~B*35:08~DRB1*14:04	0.00324679
A*23:01g~DRB1*13:02	0.00206329		A*11:01g~B*44:03~DRB1*12:01	0.00324679
A*68:125~B*07:02g	0.002		A*30:01g~B*18:02~DRB1*07:01	0.00324679
A*66:01g~DRB1*13:117	0.00194239		A*25:01g~B*08:01g~DRB1*03:01	0.00324679
A*66:01g~DRB1*13:105	0.00194239		A*30:04g~B*49:01g~DRB1*11:04	0.00324679
B*58:02~DRB1*13:112	0.00194026		A*30:01g~B*58:02~DRB1*12:01	0.00324679
B*81:01g~DRB1*13:02	0.00193799		A*68:01g~B*35:01g~DRB1*04:05	0.00324679
B*57:70~DRB1*13:03	0.00193799		A*69:01~B*35:08~DRB1*14:54	0.00324679
B*53:01g~DRB1*13:128	0.00193799		A*33:03g~B*58:02~DRB1*13:01	0.00324679
A*74:01g~DRB1*04:05	0.00193799		A*03:01g~B*53:01g~DRB1*08:04	0.00324679
B*44:193~DRB1*15:03	0.00193501		A*68:01g~B*58:02~DRB1*04:04	0.00324679
B*44:207~DRB1*15:03	0.00193501		A*68:01g~B*50:01g~DRB1*14:01	0.00324679
B*44:198N~DRB1*15:03	0.00193501		A*24:02g~B*46:01g~DRB1*09:01	0.00324679
A*66:01g~DRB1*13:112	0.00192898		A*02:01g~B*40:03g~DRB1*14:05	0.00324679
B*53:01g~DRB1*13:02	0.00192152		A*26:01g~B*15:01g~DRB1*04:02	0.00324679
B*58:02~DRB1*13:105	0.00191676		A*02:02~B*15:10~DRB1*08:04	0.00324679
B*15:03g~DRB1*13:02	0.00188954		A*25:01g~B*18:01g~DRB1*11:04	0.00324679
B*15:03g~DRB1*13:128	0.00188954		A*02:05g~B*58:01g~DRB1*15:03	0.00324679
A*66:01g~DRB1*13:01	0.00188184		A*02:01g~B*44:02g~DRB1*12:01	0.00324679
B*58:02~DRB1*13:190	0.00184434		A*03:01g~B*14:02~DRB1*01:02	0.00324679
A*66:01g~B*53:01g	0.00184164		A*29:02g~B*44:03~DRB1*15:01	0.00324679
A*11:01g~DRB1*01:01	0.00184008		A*02:06g~B*40:06~DRB1*14:04	0.00324679
A*29:02g~DRB1*03:102	0.00179452		A*02:01g~B*27:05g~DRB1*13:03	0.00324679
A*68:119~DRB1*15:03	0.00179129		A*02:01g~B*44:02g~DRB1*01:01	0.00324679
A*03:01g~DRB1*03:102	0.00174765		A*02:01g~B*51:01g~DRB1*13:01	0.00324679
A*03:01g~DRB1*03:02	0.00174765		A*66:02~B*41:01~DRB1*03:02	0.00324679
A*30:01g~DRB1*15:03	0.00174419		A*01:01g~B*42:01~DRB1*07:01	0.00324679
A*03:01g~B*15:16	0.00172653		A*66:01g~B*50:01g~DRB1*07:01	0.00324679
B*08:01g~DRB1*03:102	0.00169574		A*03:01g~B*57:02~DRB1*13:02	0.00324679
B*08:01g~DRB1*03:02	0.00169574		A*26:01g~B*40:01g~DRB1*13:02	0.00324679
A*29:02g~DRB1*13:03	0.0016783		A*31:01g~B*40:02g~DRB1*04:07	0.00324679
B*58:02~DRB1*15:03	0.00167236		A*01:01g~B*35:03g~DRB1*07:01	0.00324679
A*33:01g~B*15:01g	0.00165747		A*03:01g~B*51:01g~DRB1*11:01	0.00324679
A*26:01g~B*15:03g	0.00161143		A*23:01g~B*07:02g~DRB1*07:01	0.00324679
A*30:02g~B*39:89	0.00161143		A*02:01g~B*35:08~DRB1*11:02	0.00324679
A*30:02g~B*39:99	0.00161143		A*01:01g~B*44:02g~DRB1*01:01	0.00324679
A*30:04g~B*51:01g	0.00159931		A*11:01g~B*56:01g~DRB1*01:01	0.00324679
A*34:02~B*53:01g	0.00157702		A*11:01g~B*35:01g~DRB1*04:01	0.00324679
A*30:01g~DRB1*13:02	0.00151091		A*02:01g~B*35:01g~DRB1*14:54	0.00324679
A*74:01g~DRB1*15:03	0.00147474		A*32:01g~B*38:01~DRB1*10:01	0.00324679
A*30:01g~DRB1*11:02	0.00146625		A*02:01g~B*07:05g~DRB1*11:04	0.00324679
A*66:01g~DRB1*13:121	0.0014579		A*02:01g~B*13:02g~DRB1*04:01	0.00324679
B*14:39~DRB1*15:03	0.0014535		A*02:01g~B*40:06~DRB1*15:02	0.00324679
A*43:01~DRB1*13:128	0.00145349		A*68:01g~B*15:18g~DRB1*04:01	0.00324679
A*43:01~DRB1*13:02	0.00145349		A*68:01g~B*27:04g~DRB1*11:01	0.00324679
A*68:31~DRB1*15:03	0.00145349		A*01:01g~B*35:02g~DRB1*08:01	0.00324679
A*66:05~DRB1*11:01	0.00145349		A*11:01g~B*52:01g~DRB1*11:04	0.00324679
A*30:02g~DRB1*01:43	0.00145349		A*02:01g~B*07:05g~DRB1*04:05	0.00324679
A*03:22~DRB1*15:01	0.00145349		A*03:01g~B*15:10~DRB1*11:01	0.00324679
A*29:32~DRB1*13:03	0.00145349		A*02:01g~B*40:02g~DRB1*11:01	0.00324679
A*30:61~DRB1*03:01	0.00145349		A*29:02g~B*44:29~DRB1*13:01	0.00324679
A*02:229~DRB1*11:02	0.00145349		A*01:01g~B*35:01g~DRB1*01:01	0.00324679
A*29:09~DRB1*11:01	0.00145349		A*02:01g~B*52:01g~DRB1*15:02	0.00324679
A*68:01g~DRB1*15:94	0.00145349		A*03:01g~B*27:05g~DRB1*04:08	0.00324679
B*57:03~C*07:01g	0.00145349		A*02:01g~B*15:01g~DRB1*01:01	0.00324679
A*66:02~B*07:02g	0.00143648		A*02:01g~B*35:01g~DRB1*01:01	0.00324679
A*02:02~C*07:01g	0.00142046		A*11:01g~B*38:02g~DRB1*15:02	0.00324679
A*30:01g~DRB1*12:10	0.00139535		A*23:01g~B*49:01g~DRB1*15:02	0.00324679
A*30:01g~DRB1*12:06	0.00139535		B*35:01g~C*07:15~DRB1*14:54	0.00324675
A*30:01g~DRB1*12:17	0.00139535		B*35:01g~C*07:02g~DRB1*14:54	0.00324675
A*03:01g~DRB1*03:115	0.00138428		A*02:01g~C*07:15~DRB1*04:01	0.00316456
A*34:10N~B*53:01g	0.00138123		A*02:01g~B*51:01g~C*07:15	0.00290698
A*02:02~B*58:02	0.00138123		A*02:01g~B*51:01g~C*07:02g	0.00290698
A*02:02~B*58:60	0.00138123		A*02:01g~B*15:16~DRB1*01:02	0.00242068
A*29:32~B*45:01g	0.00138123		A*74:01g~B*15:03g~DRB1*15:03	0.00216452
A*80:01~B*57:70	0.00138123		C*07:01g~DQB1*06:02~DRB1*11:01	0.00204918
A*02:02~B*15:03g	0.00138123		B*15:10~C*07:01g~DQB1*06:02	0.00195312
A*02:492~B*15:03g	0.00138123		A*68:02g~C*07:01g~DQB1*06:02	0.00192308
A*80:01~B*57:03	0.00138123		A*66:02~B*07:02g~DRB1*15:03	0.00168833
A*68:03~B*58:02	0.00138123		A*29:32~B*45:01g~DRB1*13:03	0.00162339
A*02:229~B*58:01g	0.00138123		A*02:229~B*58:01g~DRB1*11:02	0.00162339
A*34:10N~B*53:27	0.00138123		A*23:01g~B*07:02g~DRB1*13:02	0.00162339
A*03:22~B*56:01g	0.00138123		A*29:02g~B*45:01g~DRB1*13:03	0.00162339
A*68:125~B*15:16	0.00138123		A*03:22~B*56:01g~DRB1*15:01	0.00162339
A*30:02g~B*14:39	0.00138123		A*30:02g~B*14:39~DRB1*15:03	0.00162339
A*29:02g~B*45:01g	0.00138123		A*30:25~B*14:02~DRB1*15:03	0.00162339
A*30:25~B*14:02	0.00138123		A*29:09~B*81:01g~DRB1*11:01	0.00162339
A*29:09~B*81:01g	0.00138123		A*29:02g~B*81:01g~DRB1*11:01	0.00162339
A*68:01g~B*82:01	0.00138123		A*03:01g~B*56:01g~DRB1*15:01	0.00162339
A*68:01g~B*82:02	0.00138123		B*57:03~C*07:01g~DRB1*01:02	0.00162338
A*03:01g~B*56:01g	0.00138123		A*02:02~C*07:01g~DRB1*01:02	0.00158228
A*34:02~B*53:27	0.00138123		A*66:01g~B*58:02~DRB1*13:117	0.00155821
A*30:01g~DRB1*13:128	0.0013305		A*66:01g~B*58:02~DRB1*13:01	0.00155821
B*42:02~DRB1*12:06	0.00130815		A*66:01g~B*58:02~DRB1*13:105	0.00155821
B*42:02~DRB1*12:10	0.00130815		A*66:01g~B*58:02~DRB1*13:112	0.00155821
B*42:02~DRB1*12:17	0.00130815		A*30:01g~B*81:01g~DRB1*15:03	0.00146105
A*30:01g~DRB1*03:102	0.00130814		A*30:01g~B*42:01~DRB1*03:102	0.00146105
A*03:01g~B*58:60	0.00130083		A*02:02~B*57:03~C*07:01g	0.00145349
A*29:02g~DRB1*03:115	0.00128531		A*24:02g~B*07:02g~DRB1*15:03	0.00142733
B*15:10~DRB1*11:117	0.00128234		A*33:03g~B*44:03~DRB1*12:02	0.00142047
B*15:10~DRB1*11:100	0.00128234		A*33:03g~B*44:199~DRB1*12:02	0.00142047
B*15:10~DRB1*11:97	0.00128234		A*34:02~B*58:01g~DRB1*04:178N	0.00129871
A*33:03g~DRB1*09:09	0.00127181		A*34:02~B*58:01g~DRB1*04:05	0.00129871
A*33:03g~DRB1*09:01	0.00127181		A*68:01g~B*45:01g~DRB1*15:94	0.00121754
A*02:01g~B*53:01g	0.00126868		A*68:01g~B*45:01g~DRB1*15:03	0.00121754
A*23:01g~B*15:03g	0.0012431		A*74:18~B*15:03g~DRB1*15:03	0.00108226
A*33:03g~B*44:03	0.00120857		A*30:02g~B*81:01g~DRB1*03:01	0.00108226
A*33:03g~B*44:199	0.00120857		A*30:02g~B*81:01g~DRB1*15:03	0.00108226
A*33:03g~B*15:312	0.00120857		A*66:01g~B*35:01g~DRB1*11:01	0.00108226
A*30:04g~B*07:02g	0.00119706		A*66:05~B*35:01g~DRB1*11:01	0.00108226
B*15:03g~DRB1*08:04	0.00118978		A*30:25~B*81:01g~DRB1*15:03	0.00108226
A*23:01g~B*15:312	0.00118391		A*74:01g~B*15:03g~DRB1*13:02	0.00108226
A*23:01g~DRB1*11:100	0.00116287		A*74:01g~B*15:03g~DRB1*13:128	0.00108226
A*23:01g~DRB1*11:97	0.00116287		A*43:01~B*53:01g~DRB1*13:02	0.00108226
B*58:01g~DRB1*04:05	0.0011628		A*30:61~B*81:01g~DRB1*03:01	0.00108226
B*58:01g~DRB1*04:178N	0.0011628		A*43:01~B*53:01g~DRB1*13:128	0.00108226
B*15:03g~DRB1*08:59	0.00115492		A*30:02g~B*42:01~DRB1*03:115	0.00108226
A*74:18~DRB1*13:128	0.00111807		A*30:02g~B*42:01~DRB1*03:102	0.00108226
A*74:18~DRB1*13:02	0.00111807		C*07:46~DQB1*06:02~DRB1*11:01	0.00102459
A*30:02g~DRB1*13:01	0.00111773		C*07:22~DQB1*06:02~DRB1*11:01	0.00102459
A*34:02~B*44:222	0.00110498		C*07:28~DQB1*06:02~DRB1*11:01	0.00102459
A*43:01~B*15:123g	0.00110488		C*07:45~DQB1*06:02~DRB1*11:01	0.00102459
B*35:01g~DRB1*13:02	0.0010659		C*07:47~DQB1*06:02~DRB1*11:01	0.00102459
B*35:01g~DRB1*13:128	0.0010659		C*07:02g~DQB1*06:02~DRB1*11:01	0.00102459
A*34:02~DRB1*03:102	0.00104822		A*66:01g~B*58:02~DRB1*13:121	0.00101708
A*34:02~DRB1*03:02	0.00104331		B*15:10~C*07:45~DQB1*06:02	0.000976562
A*03:01g~B*08:01g	0.00102091		B*15:10~C*07:46~DQB1*06:02	0.000976562
A*30:83~B*44:03	0.00101938		B*15:10~C*07:28~DQB1*06:02	0.000976562
A*30:87~B*44:03	0.00101938		B*15:10~C*07:22~DQB1*06:02	0.000976562
B*49:01g~DRB1*09:21	0.00101745		B*15:10~C*07:02g~DQB1*06:02	0.000976562
B*49:30~DRB1*09:01	0.00101745		B*15:10~C*07:47~DQB1*06:02	0.000976562
B*49:01g~DRB1*09:01	0.00101745		A*68:02g~C*07:28~DQB1*06:02	0.000961538
B*49:30~DRB1*09:21	0.00101745		A*68:02g~C*07:45~DQB1*06:02	0.000961538
A*30:87~B*42:01	0.0010129		A*68:02g~C*07:22~DQB1*06:02	0.000961538
A*30:83~B*42:01	0.0010129		A*68:02g~C*07:46~DQB1*06:02	0.000961538
A*34:02~DRB1*03:115	0.00100935		A*68:02g~C*07:47~DQB1*06:02	0.000961538
A*02:01g~DRB1*13:128	0.00100129		A*23:01g~B*39:10~DRB1*11:02	0.000927653
A*23:01g~B*15:10	0.000999992		A*23:01g~B*39:89~DRB1*11:02	0.000927653
A*23:03~DRB1*13:02	0.000994055		A*23:01g~B*39:99~DRB1*11:02	0.000927653
A*23:01g~DRB1*03:02	0.00099322		A*68:125~B*07:02g~DRB1*15:03	0.00091757
A*23:01g~DRB1*03:102	0.00099322		A*43:01~B*18:01g~DRB1*08:04	0.000885487
A*30:02g~DRB1*13:117	0.000991017		A*30:02g~B*39:10~DRB1*13:105	0.000879338
A*30:02g~DRB1*13:105	0.000991017		A*30:02g~B*39:10~DRB1*13:01	0.000879338
A*30:02g~DRB1*13:166	0.000991013		A*30:02g~B*39:10~DRB1*13:117	0.000879338
A*34:02~DRB1*12:17	0.000985602		A*30:02g~B*39:10~DRB1*13:166	0.000879338
A*34:02~DRB1*12:01	0.000985602		A*03:01g~B*49:30~DRB1*09:21	0.000862185
A*34:02~DRB1*12:06	0.000985602		A*03:01g~B*49:01g~DRB1*09:21	0.000862185
A*34:02~DRB1*12:10	0.000985602		A*03:01g~B*49:01g~DRB1*09:01	0.000862185
B*58:02~DRB1*13:121	0.000980008		A*03:01g~B*49:30~DRB1*09:01	0.000862185
B*39:99~DRB1*11:02	0.000968997		A*02:01g~C*03:04g~DRB1*03:01	0.000823909
B*39:10~DRB1*11:02	0.000968997		A*30:02g~B*42:01~DRB1*12:17	0.000811696
B*39:89~DRB1*11:02	0.000968997		A*30:02g~B*42:01~DRB1*12:01	0.000811696
B*18:01g~DRB1*11:02	0.000968997		A*30:02g~B*42:01~DRB1*12:10	0.000811696
B*07:202~DRB1*13:02	0.000968997		A*30:02g~B*42:01~DRB1*12:06	0.000811696
B*08:01g~DRB1*03:115	0.000968997		A*43:01~B*15:10~DRB1*04:151	0.000811696
B*48:06~DRB1*15:03	0.000968997		A*23:03~B*07:02g~DRB1*13:02	0.000811696
B*41:01~DRB1*01:50	0.000968997		A*68:03~B*58:02~DRB1*07:01	0.000811696
B*41:01~DRB1*01:67	0.000968997		A*68:03~B*58:02~DRB1*07:34	0.000811696
B*41:01~DRB1*01:01	0.000968997		A*30:02g~B*53:01g~DRB1*15:03	0.000811696
B*53:32~DRB1*13:128	0.000968997		A*43:01~B*15:10~DRB1*04:175	0.000811696
A*02:546~DRB1*11:02	0.000968995		A*30:02g~B*53:27~DRB1*15:03	0.000811696
A*02:484~DRB1*11:02	0.000968995		A*43:01~B*15:10~DRB1*04:01	0.000811696
A*68:122~DRB1*15:03	0.000968995		A*43:01~B*15:10~DRB1*04:171	0.000811696
A*02:532~DRB1*11:02	0.000968995		A*68:01g~B*58:02~DRB1*07:34	0.000811696
A*66:02~DRB1*03:102	0.000968995		A*68:01g~B*58:02~DRB1*07:01	0.000811696
A*66:02~DRB1*03:115	0.000968995		B*57:03~C*07:46~DRB1*01:02	0.000811689
A*74:13~DRB1*04:05	0.000968995		B*57:03~C*07:02g~DRB1*01:02	0.000811689
C*17:01g~DQB1*03:30	0.000961538		B*57:03~C*07:22~DRB1*01:02	0.000811689
C*07:22~DQB1*06:02	0.000961538		B*57:03~C*07:28~DRB1*01:02	0.000811689
C*07:28~DQB1*06:02	0.000961538		B*57:03~C*07:45~DRB1*01:02	0.000811689
C*07:45~DQB1*06:02	0.000961538		B*57:03~C*07:47~DRB1*01:02	0.000811689
C*07:46~DQB1*06:02	0.000961538		A*02:02~C*07:47~DRB1*01:02	0.00079114
C*07:47~DQB1*06:02	0.000961538		A*02:02~C*07:46~DRB1*01:02	0.00079114
B*53:32~DRB1*13:02	0.000960761		A*02:02~C*07:45~DRB1*01:02	0.00079114
B*07:02g~DRB1*09:01	0.000954416		A*02:02~C*07:28~DRB1*01:02	0.00079114
B*07:02g~DRB1*09:09	0.000954416		A*02:02~C*07:22~DRB1*01:02	0.00079114
B*35:76~DRB1*11:01	0.000946523		A*02:02~C*07:02g~DRB1*01:02	0.00079114
A*30:61~B*81:01g	0.000920818		A*02:01g~B*53:01g~DRB1*13:02	0.000745558
A*66:05~B*35:01g	0.000920818		A*02:01g~B*53:01g~DRB1*13:128	0.000745558
A*66:01g~B*35:01g	0.000920818		A*02:02~B*57:03~C*07:28	0.000726745
A*30:25~B*81:01g	0.000920818		A*02:02~B*57:03~C*07:47	0.000726745
A*66:01g~B*53:32	0.000920818		A*02:02~B*57:03~C*07:46	0.000726745
A*74:01g~B*57:07	0.000920818		A*02:02~B*57:03~C*07:02g	0.000726745
A*68:125~B*53:01g	0.000920818		A*02:02~B*57:03~C*07:22	0.000726745
A*74:01g~B*57:70	0.000920818		A*02:02~B*57:03~C*07:45	0.000726745
A*68:02g~B*53:01g	0.000920818		A*02:01g~B*15:10~C*03:04g	0.000714799
A*23:01g~DRB1*09:09	0.000920545		A*30:78N~B*42:01~DRB1*03:02	0.000649357
A*29:44~B*44:03	0.000911406		A*30:73N~B*42:01~DRB1*03:02	0.000649357
A*66:01g~DRB1*11:155	0.000891536		A*30:62~B*42:01~DRB1*03:02	0.000649357
A*66:01g~DRB1*11:158	0.000891536		A*30:01g~B*42:01~DRB1*03:115	0.000649357
A*66:01g~DRB1*11:157	0.000891536		A*33:03g~B*15:16~DRB1*01:46	0.000631319
A*66:01g~DRB1*11:117	0.000891536		A*33:03g~B*15:16~DRB1*01:57	0.000631319
A*66:01g~DRB1*11:97	0.000891536		A*33:03g~B*15:16~DRB1*01:02	0.000631319
A*66:01g~DRB1*11:100	0.000891536		A*24:17~B*15:02g~DRB1*07:01	0.000608772
B*82:01~DRB1*15:03	0.000889443		A*24:17~B*15:02g~DRB1*07:34	0.000608772
B*82:02~DRB1*15:03	0.000889443		A*24:17~B*15:02g~DRB1*07:33	0.000608772
A*30:02g~DRB1*03:112	0.000883652		A*24:17~B*15:02g~DRB1*07:31	0.000608772
A*30:02g~DRB1*03:107	0.000883652		A*34:02~B*81:01g~DRB1*12:01	0.000608772
A*30:02g~DRB1*03:104	0.000883652		A*34:02~B*81:01g~DRB1*12:10	0.000608772
A*30:02g~DRB1*03:100	0.000883652		A*34:02~B*81:01g~DRB1*12:06	0.000608772
B*58:60~DRB1*07:34	0.000879734		A*34:02~B*81:01g~DRB1*12:17	0.000608772
A*66:01g~DRB1*13:183	0.0008765		A*68:125~B*18:01g~DRB1*11:02	0.000541131
A*66:01g~DRB1*13:166	0.000876499		A*68:02g~B*18:01g~DRB1*11:02	0.000541131
B*39:10~DRB1*13:166	0.00086594		A*30:02g~B*48:06~DRB1*15:03	0.000541131
B*39:10~DRB1*13:105	0.000856858		A*66:01g~B*35:76~DRB1*11:01	0.000541131
B*58:60~DRB1*07:01	0.000855563		A*30:02g~B*07:202~DRB1*03:01	0.000541131
B*58:02~DRB1*03:02	0.000854089		A*66:05~B*35:76~DRB1*11:01	0.000541131
B*39:10~DRB1*13:117	0.000851755		A*30:25~B*48:06~DRB1*15:03	0.000541131
A*66:01g~DRB1*13:190	0.000849084		A*43:01~B*53:32~DRB1*13:02	0.000541131
A*66:01g~DRB1*13:186	0.000848181		A*43:01~B*53:32~DRB1*13:128	0.000541131
A*66:01g~DRB1*13:173	0.000848181		A*74:18~B*15:03g~DRB1*13:128	0.000541131
B*53:01g~DRB1*01:57	0.000847872		A*30:61~B*07:202~DRB1*03:01	0.000541131
B*53:01g~DRB1*01:46	0.000847872		A*74:18~B*15:03g~DRB1*13:02	0.000541131
B*53:27~DRB1*01:46	0.000847872		A*66:01g~B*58:02~DRB1*13:153	0.000541131
B*53:27~DRB1*01:57	0.000847872		A*66:01g~B*58:02~DRB1*13:148	0.000541131
A*33:03g~DRB1*09:21	0.00084787		A*23:01g~B*07:80~DRB1*13:02	0.000541131
A*29:02g~B*58:02	0.000844083		A*23:01g~B*08:01g~DRB1*09:09	0.000541131
B*39:10~DRB1*13:01	0.000839464		A*23:01g~B*08:01g~DRB1*09:01	0.000541131
A*30:02g~B*08:01g	0.000828736		A*23:01g~B*08:01g~DRB1*09:21	0.000541131
A*01:01g~B*58:02	0.000828736		A*30:01g~B*81:07~DRB1*15:03	0.000487018
A*01:01g~B*58:60	0.000828736		A*30:87~B*81:01g~DRB1*15:03	0.000487018
A*80:01~B*18:01g	0.000828736		A*30:83~B*81:01g~DRB1*15:03	0.000487018
B*58:02~DRB1*13:186	0.00082672		A*30:87~B*42:01~DRB1*03:02	0.000487018
B*58:02~DRB1*13:173	0.00082672		A*30:87~B*42:01~DRB1*03:102	0.000487018
B*58:60~DRB1*13:190	0.000820076		A*30:83~B*42:01~DRB1*03:102	0.000487018
A*29:02g~B*07:05g	0.000818505		A*29:01~B*15:03g~DRB1*13:145	0.000487018
B*58:60~DRB1*13:112	0.000814767		A*29:01~B*15:03g~DRB1*13:142N	0.000487018
B*58:60~DRB1*13:173	0.000810168		A*29:01~B*15:03g~DRB1*13:128	0.000487018
B*58:60~DRB1*13:186	0.000810168		A*29:01~B*15:03g~DRB1*13:02	0.000487018
A*34:02~B*08:127	0.000805715		A*30:83~B*42:01~DRB1*03:02	0.000487018
A*34:02~B*08:72N	0.000805715		A*29:02g~B*42:01~DRB1*03:115	0.00043282
A*34:02~B*08:121	0.000805715		A*29:02g~B*42:01~DRB1*03:102	0.00043282
A*23:01g~B*08:127	0.000800234		A*29:02g~B*42:01~DRB1*03:02	0.000432816
A*23:01g~B*08:72N	0.000800234		A*33:03g~B*15:10~DRB1*11:100	0.000414303
A*23:01g~B*08:121	0.000800234		A*33:03g~B*15:10~DRB1*11:117	0.000414303
B*58:02~DRB1*13:166	0.000799648		A*33:03g~B*15:10~DRB1*11:97	0.000414303
B*45:01g~DRB1*13:112	0.00079722		A*33:03g~B*15:10~DRB1*11:01	0.000414043
B*45:01g~DRB1*13:105	0.00079722		A*02:01g~B*45:01g~DRB1*13:112	0.000408743
B*45:01g~DRB1*13:117	0.00079722		A*02:01g~B*45:01g~DRB1*13:173	0.000408743
B*45:01g~DRB1*13:01	0.00079722		A*02:01g~B*45:01g~DRB1*13:185N	0.000408743
B*58:60~DRB1*07:33	0.000796345		A*02:01g~B*45:01g~DRB1*13:186	0.000408743
B*58:60~DRB1*07:31	0.000796345		A*02:01g~B*45:01g~DRB1*13:117	0.000408743
B*18:01g~DRB1*08:04	0.000792665		A*02:01g~B*45:01g~DRB1*13:105	0.000408743
B*58:60~DRB1*13:01	0.000791255		A*02:01g~B*45:01g~DRB1*13:01	0.000408743
C*07:28~DRB1*01:02	0.00079114		A*02:01g~B*45:01g~DRB1*13:166	0.000408743
C*07:22~DRB1*01:02	0.00079114		A*02:01g~B*45:01g~DRB1*13:190	0.000408743
C*07:47~DRB1*01:02	0.00079114		A*30:66~B*53:01g~DRB1*15:03	0.000405848
C*07:46~DRB1*01:02	0.00079114		A*02:02~B*58:02~DRB1*07:33	0.000405848
C*07:45~DRB1*01:02	0.00079114		A*03:01g~B*44:198N~DRB1*03:02	0.000405848
B*58:60~DRB1*13:117	0.000789027		A*03:01g~B*44:193~DRB1*03:102	0.000405848
B*58:60~DRB1*13:105	0.000787727		A*02:02~B*58:02~DRB1*07:34	0.000405848
B*58:60~DRB1*13:166	0.000783992		A*02:02~B*58:60~DRB1*07:31	0.000405848
A*30:02g~DRB1*03:68N	0.000780365		A*02:02~B*58:02~DRB1*07:31	0.000405848
A*30:02g~DRB1*03:83	0.000780365		A*02:02~B*58:60~DRB1*07:34	0.000405848
A*30:02g~DRB1*03:50	0.000780365		A*02:02~B*58:02~DRB1*07:01	0.000405848
B*39:99~DRB1*15:03	0.000767758		A*30:70N~B*53:27~DRB1*15:03	0.000405848
B*39:89~DRB1*15:03	0.000767758		A*03:01g~B*44:193~DRB1*03:02	0.000405848
A*29:01~B*18:01g	0.000753396		A*30:70N~B*53:01g~DRB1*15:03	0.000405848
A*68:02g~B*49:01g	0.000742508		A*30:66~B*53:27~DRB1*15:03	0.000405848
A*68:02g~B*49:30	0.000742508		A*02:02~B*58:60~DRB1*07:33	0.000405848
B*58:02~DRB1*07:31	0.000731958		A*03:01g~B*44:198N~DRB1*03:102	0.000405848
B*58:02~DRB1*07:33	0.000731958		A*02:02~B*58:60~DRB1*07:01	0.000405848
A*03:01g~B*58:06	0.000726961		A*03:01g~B*44:03~DRB1*03:102	0.000405848
B*53:27~DRB1*03:02	0.000726748		A*03:01g~B*44:03~DRB1*03:02	0.000405848
B*57:03~DRB1*13:115	0.000726748		A*68:01g~B*45:04~DRB1*15:94	0.000405848
B*53:01g~DRB1*03:02	0.000726748		A*68:01g~B*45:04~DRB1*15:03	0.000405848
B*53:01g~DRB1*03:102	0.000726748		A*29:02g~B*44:03~DRB1*11:157	0.000403389
B*53:27~DRB1*03:102	0.000726748		A*29:02g~B*44:03~DRB1*11:155	0.000403389
B*15:341~DRB1*12:02	0.000726748		A*29:02g~B*44:03~DRB1*11:97	0.000403389
B*82:01~DRB1*15:94	0.000726748		A*29:02g~B*44:03~DRB1*11:158	0.000403389
B*07:80~DRB1*03:01	0.000726748		A*29:02g~B*44:03~DRB1*11:169N	0.000403389
B*82:02~DRB1*15:94	0.000726748		A*29:02g~B*44:03~DRB1*11:117	0.000403389
B*42:01~DRB1*12:17	0.000726748		A*29:02g~B*44:03~DRB1*11:01	0.000403389
B*42:01~DRB1*12:06	0.000726748		A*29:02g~B*44:03~DRB1*11:100	0.000403389
B*42:01~DRB1*12:10	0.000726748		A*30:02g~B*58:49~DRB1*15:03	0.000403086
A*43:01~DRB1*04:151	0.000726746		A*03:01g~B*58:60~DRB1*03:02	0.000386522
A*43:01~DRB1*04:175	0.000726746		A*03:01g~B*58:02~DRB1*03:102	0.000386522
A*43:01~DRB1*04:171	0.000726746		A*03:01g~B*58:02~DRB1*03:02	0.000386522
A*02:05g~DRB1*04:178N	0.000726746		A*03:01g~B*58:60~DRB1*03:102	0.000386522
A*43:01~DRB1*13:145	0.000726746		A*03:01g~B*58:60~DRB1*03:115	0.000386522
A*02:02~DRB1*07:31	0.000726746		A*03:01g~B*58:02~DRB1*03:115	0.000386522
A*43:01~DRB1*13:142N	0.000726746		A*23:01g~B*07:02g~DRB1*09:19	0.000376859
A*02:02~DRB1*07:01	0.000726746		A*23:01g~B*07:02g~DRB1*09:01	0.000376859
A*02:05g~DRB1*04:05	0.000726746		A*23:01g~B*07:02g~DRB1*09:09	0.000376859
A*02:02~DRB1*07:33	0.000726746		A*23:01g~B*07:02g~DRB1*09:18	0.000376859
A*68:03~DRB1*07:01	0.000726746		A*02:01g~B*53:32~DRB1*13:128	0.000372779
A*30:70N~DRB1*15:03	0.000726746		A*02:01g~B*53:32~DRB1*13:02	0.000372779
A*30:66~DRB1*15:03	0.000726746		A*66:01g~B*58:60~DRB1*13:112	0.000367723
A*02:02~DRB1*07:34	0.000726746		A*66:01g~B*58:60~DRB1*13:105	0.000367723
A*68:03~DRB1*07:34	0.000726746		A*66:01g~B*58:02~DRB1*13:190	0.000367723
A*34:09~DRB1*13:02	0.000726746		A*66:01g~B*58:02~DRB1*13:183	0.000367723
A*34:02~DRB1*13:128	0.000726746		A*66:01g~B*58:60~DRB1*13:01	0.000367723
A*34:09~DRB1*13:128	0.000726746		A*66:01g~B*58:60~DRB1*13:173	0.000367723
A*34:02~DRB1*13:02	0.000726746		A*66:01g~B*58:02~DRB1*13:186	0.000367723
A*68:01g~DRB1*07:34	0.000726746		A*66:01g~B*58:60~DRB1*13:190	0.000367723
B*57:03~C*07:22	0.000726744		A*66:01g~B*58:60~DRB1*13:121	0.000367723
B*57:03~C*07:02g	0.000726744		A*66:01g~B*58:02~DRB1*13:173	0.000367723
B*57:03~C*07:47	0.000726744		A*66:01g~B*58:02~DRB1*13:166	0.000367723
B*57:03~C*07:46	0.000726744		A*66:01g~B*58:60~DRB1*13:166	0.000367723
B*57:03~C*07:45	0.000726744		A*66:01g~B*58:60~DRB1*13:183	0.000367723
B*57:03~C*07:28	0.000726744		A*66:01g~B*58:60~DRB1*13:186	0.000367723
B*42:01~DRB1*12:01	0.000725484		A*66:01g~B*58:60~DRB1*13:117	0.000367723
A*03:01g~B*49:01g	0.000724633		A*68:60~C*16:01g~DRB1*01:02	0.000351618
A*03:01g~B*49:30	0.000724633		A*68:62~C*16:01g~DRB1*01:02	0.000351618
B*44:03~DRB1*11:169N	0.000724485		A*68:64~C*16:01g~DRB1*01:02	0.000351618
B*81:01g~DRB1*11:157	0.000721354		A*68:67~C*16:01g~DRB1*01:02	0.000351618
B*81:01g~DRB1*11:155	0.000721354		A*68:74~C*16:01g~DRB1*01:02	0.000351618
B*81:01g~DRB1*11:158	0.000721354		A*68:77~C*16:01g~DRB1*01:02	0.000351618
B*81:01g~DRB1*11:97	0.000721354		A*68:78~C*16:01g~DRB1*01:02	0.000351618
B*81:01g~DRB1*11:117	0.000721354		A*68:53~C*16:01g~DRB1*01:02	0.000351618
B*81:01g~DRB1*11:100	0.000721354		A*68:81~C*16:01g~DRB1*01:02	0.000351618
A*29:64~B*44:03	0.000720545		A*68:80~C*16:01g~DRB1*01:02	0.000351618
A*29:65~B*44:03	0.000720545		A*68:82~C*16:01g~DRB1*01:02	0.000351618
A*29:72~B*44:03	0.000720545		A*68:49N~C*16:01g~DRB1*01:02	0.000351618
B*15:03g~DRB1*11:117	0.000714236		A*68:48~C*16:01g~DRB1*01:02	0.000351618
B*15:03g~DRB1*11:100	0.000714236		A*68:44~C*16:01g~DRB1*01:02	0.000351618
B*15:03g~DRB1*11:97	0.000714236		A*68:40~C*16:01g~DRB1*01:02	0.000351618
A*02:02~C*07:47	0.000710228		A*68:34~C*16:01g~DRB1*01:02	0.000351618
A*02:02~C*07:46	0.000710228		A*68:18N~C*16:01g~DRB1*01:02	0.000351618
A*02:02~C*07:45	0.000710228		A*68:67~B*15:16~C*16:01g	0.000322998
A*02:02~C*07:28	0.000710228		A*68:81~B*15:16~C*16:01g	0.000322998
A*02:02~C*07:22	0.000710228		A*68:80~B*15:16~C*16:01g	0.000322998
A*02:02~C*07:02g	0.000710228		A*68:82~B*15:16~C*16:01g	0.000322998
B*15:10~DRB1*04:175	0.000705944		A*68:78~B*15:16~C*16:01g	0.000322998
B*15:10~DRB1*04:01	0.000705944		A*68:77~B*15:16~C*16:01g	0.000322998
B*15:10~DRB1*04:171	0.000705944		A*68:74~B*15:16~C*16:01g	0.000322998
B*15:10~DRB1*04:151	0.000705944		A*68:64~B*15:16~C*16:01g	0.000322998
A*02:532~B*58:01g	0.00070317		A*68:62~B*15:16~C*16:01g	0.000322998
A*02:546~B*58:01g	0.00070317		A*68:53~B*15:16~C*16:01g	0.000322998
A*02:484~B*58:01g	0.00070317		A*68:60~B*15:16~C*16:01g	0.000322998
B*44:03~DRB1*11:97	0.000695597		A*68:49N~B*15:16~C*16:01g	0.000322998
B*44:03~DRB1*11:117	0.000695597		A*68:48~B*15:16~C*16:01g	0.000322998
B*44:03~DRB1*11:100	0.000695597		A*68:44~B*15:16~C*16:01g	0.000322998
B*44:03~DRB1*11:158	0.000695597		A*68:40~B*15:16~C*16:01g	0.000322998
B*44:03~DRB1*11:155	0.000695597		A*68:34~B*15:16~C*16:01g	0.000322998
B*44:03~DRB1*11:157	0.000695597		A*68:18N~B*15:16~C*16:01g	0.000322998
A*29:34~B*44:03	0.000690613		A*29:02g~B*53:27~DRB1*03:102	0.000304386
A*66:12~B*58:60	0.000690613		A*29:02g~B*53:01g~DRB1*03:102	0.000304386
A*23:03~B*07:02g	0.000690613		A*29:02g~B*53:27~DRB1*03:02	0.000304386
A*66:12~B*58:02	0.000690613		A*29:02g~B*53:01g~DRB1*03:02	0.000304386
A*24:17~B*15:341	0.000690613		A*68:02g~C*02:02g~DRB1*13:233	0.000301387
A*02:492~B*57:70	0.000690613		A*68:02g~C*02:02g~DRB1*13:215	0.000301387
A*02:02~B*57:70	0.000690613		A*68:02g~C*02:02g~DRB1*13:190	0.000301387
A*02:492~B*57:03	0.000690613		A*68:02g~C*02:02g~DRB1*13:117	0.000301387
A*30:02g~B*53:01g	0.000690613		C*07:02g~DQB1*06:03~DRB1*13:233	0.00029848
A*30:02g~B*39:16	0.000690613		C*07:02g~DQB1*06:03~DRB1*13:215	0.00029848
A*30:02g~B*53:27	0.000690613		C*07:02g~DQB1*06:03~DRB1*13:117	0.00029848
A*30:02g~B*81:07	0.000690613		C*07:02g~DQB1*06:03~DRB1*13:190	0.00029848
A*43:01~B*81:07	0.000690613		A*43:01~B*18:90~DRB1*08:04	0.000295162
A*66:07~B*15:10	0.000690613		A*43:01~B*18:89~DRB1*08:04	0.000295162
A*29:34~B*44:37	0.000690613		A*43:01~B*18:88~DRB1*08:04	0.000295162
A*68:125~B*14:40	0.000690613		A*43:01~B*18:94N~DRB1*08:04	0.000295162
A*68:125~B*14:01	0.000690613		A*43:01~B*18:87~DRB1*08:04	0.000295162
A*29:02g~B*44:37	0.000690613		A*43:01~B*18:92~DRB1*08:04	0.000295162
A*68:02g~B*14:40	0.000690613		A*43:01~B*18:73~DRB1*08:04	0.000295162
A*29:02g~B*58:60	0.000690613		A*43:01~B*18:93~DRB1*08:04	0.000295162
A*03:01g~B*44:193	0.000690613		A*68:125~B*07:02g~DRB1*09:01	0.000293113
A*03:01g~B*44:198N	0.000690613		A*68:125~B*07:02g~DRB1*09:09	0.000293113
A*68:119~B*08:01g	0.000690613		A*68:125~B*07:02g~DRB1*09:21	0.000293113
B*15:03g~DRB1*11:155	0.000679766		A*68:02g~B*07:02g~DRB1*09:21	0.000291537
B*15:03g~DRB1*11:169N	0.000679766		A*68:02g~B*07:02g~DRB1*09:01	0.000291525
B*15:03g~DRB1*11:157	0.000679766		A*68:02g~B*07:02g~DRB1*09:09	0.000291525
B*15:03g~DRB1*11:158	0.000679766		A*68:31~B*07:02g~DRB1*15:03	0.000286481
A*23:01g~DRB1*11:117	0.000678375		A*30:82~B*42:01~DRB1*03:102	0.000270565
A*68:125~DRB1*07:31	0.000654071		A*02:05g~B*08:01g~DRB1*03:02	0.000270565
A*68:125~DRB1*07:34	0.000654071		A*30:82~B*42:01~DRB1*03:02	0.000270565
A*68:125~DRB1*07:33	0.000654071		A*23:03~B*07:80~DRB1*13:02	0.000270565
A*68:02g~DRB1*07:31	0.000654071		A*02:05g~B*08:01g~DRB1*03:102	0.000270565
A*68:02g~DRB1*07:33	0.000654071		A*02:05g~B*08:01g~DRB1*03:115	0.000270565
A*68:02g~DRB1*07:34	0.000654071		A*74:01g~B*35:01g~DRB1*04:05	0.000270565
A*68:125~DRB1*07:01	0.000654071		A*74:01g~B*44:198N~DRB1*13:128	0.000270565
A*29:02g~DRB1*11:169N	0.000646756		A*74:01g~B*44:207~DRB1*13:02	0.000270565
B*53:01g~DRB1*09:21	0.000645998		A*66:01g~B*53:01g~DRB1*11:97	0.000270565
B*53:01g~DRB1*09:09	0.000645998		A*66:01g~B*53:01g~DRB1*11:169N	0.000270565
A*66:01g~DRB1*11:169N	0.000645379		A*66:01g~B*53:01g~DRB1*11:158	0.000270565
A*29:02g~DRB1*11:100	0.000644666		A*66:01g~B*53:01g~DRB1*11:157	0.000270565
A*29:02g~DRB1*11:97	0.000644666		A*66:01g~B*53:01g~DRB1*11:155	0.000270565
A*29:02g~DRB1*11:117	0.000644666		A*66:01g~B*53:01g~DRB1*11:117	0.000270565
A*29:02g~DRB1*11:157	0.000644666		A*66:01g~B*53:01g~DRB1*11:100	0.000270565
A*29:02g~DRB1*11:158	0.000644666		A*66:01g~B*53:01g~DRB1*11:01	0.000270565
A*29:02g~DRB1*11:155	0.000644666		A*74:01g~B*44:03~DRB1*13:02	0.000270565
B*44:03~DRB1*11:01	0.000644236		A*74:01g~B*44:03~DRB1*13:128	0.000270565
A*29:72~B*44:199	0.000636899		A*43:01~B*15:03g~DRB1*03:116	0.000270565
A*29:64~B*44:199	0.000636899		A*02:492~B*57:70~DRB1*13:03	0.000270565
A*29:65~B*44:199	0.000636899		A*74:01g~B*44:193~DRB1*13:02	0.000270565
A*29:44~B*44:199	0.000636899		A*43:01~B*15:03g~DRB1*03:01	0.000270565
A*33:03g~DRB1*07:01	0.000635903		A*43:01~B*15:03g~DRB1*03:100	0.000270565
A*33:03g~DRB1*07:33	0.000635903		A*43:01~B*15:03g~DRB1*03:108	0.000270565
A*33:03g~DRB1*07:34	0.000635903		A*43:01~B*15:03g~DRB1*03:112	0.000270565
A*33:03g~DRB1*07:31	0.000635903		A*43:01~B*15:03g~DRB1*03:114	0.000270565
A*02:01g~B*53:32	0.000634341		A*43:01~B*15:03g~DRB1*03:117	0.000270565
B*44:03~DRB1*11:95	0.000632691		A*43:01~B*15:03g~DRB1*03:50	0.000270565
B*44:03~DRB1*11:166	0.000632691		A*43:01~B*15:03g~DRB1*03:68N	0.000270565
B*44:03~DRB1*11:154	0.000632691		A*43:01~B*15:03g~DRB1*03:104	0.000270565
B*58:02~DRB1*13:185N	0.000622576		A*43:01~B*15:03g~DRB1*03:107	0.000270565
B*58:60~DRB1*13:185N	0.000603998		A*43:01~B*15:03g~DRB1*03:83	0.000270565
B*15:03g~DRB1*03:116	0.000589233		A*02:492~B*57:03~DRB1*13:115	0.000270565
B*15:03g~DRB1*03:117	0.000589233		A*02:492~B*57:03~DRB1*13:151	0.000270565
B*15:03g~DRB1*03:114	0.000589233		A*02:02~B*57:03~DRB1*13:115	0.000270565
B*15:03g~DRB1*03:68N	0.000589233		A*02:02~B*57:03~DRB1*13:151	0.000270565
B*15:03g~DRB1*03:83	0.000589233		A*02:02~B*57:70~DRB1*13:115	0.000270565
B*15:03g~DRB1*03:01	0.000589233		A*74:01g~B*44:207~DRB1*13:128	0.000270565
B*15:03g~DRB1*03:112	0.000589233		A*02:02~B*57:70~DRB1*13:151	0.000270565
B*15:03g~DRB1*03:104	0.000589233		A*02:02~B*57:70~DRB1*13:03	0.000270565
B*15:03g~DRB1*03:50	0.000589233		A*02:492~B*57:03~DRB1*13:03	0.000270565
B*15:03g~DRB1*03:100	0.000589233		A*02:492~B*57:70~DRB1*13:151	0.000270565
B*58:60~DRB1*07:35	0.000581398		A*02:492~B*57:70~DRB1*13:115	0.000270565
B*42:02~DRB1*12:36	0.000581398		A*02:02~B*57:03~DRB1*13:03	0.000270565
B*44:222~DRB1*15:03	0.000581398		A*74:01g~B*44:193~DRB1*13:128	0.000270565
B*58:02~DRB1*07:35	0.000581398		A*74:01g~B*44:198N~DRB1*13:02	0.000270565
B*45:01g~DRB1*01:35	0.000581398		A*23:01g~DQB1*06:03~DRB1*13:233	0.000267754
B*45:01g~DRB1*01:34	0.000581398		A*23:01g~DQB1*06:03~DRB1*13:117	0.000267754
A*30:62~DRB1*03:02	0.000581397		A*23:01g~DQB1*06:03~DRB1*13:215	0.000267754
A*30:73N~DRB1*03:02	0.000581397		A*23:01g~DQB1*06:03~DRB1*13:190	0.000267754
A*30:78N~DRB1*03:02	0.000581397		A*30:01g~B*42:02~DRB1*12:06	0.000259743
A*30:87~DRB1*15:03	0.000581397		A*30:01g~B*42:02~DRB1*12:10	0.000259743
A*30:83~DRB1*15:03	0.000581397		A*30:01g~B*42:02~DRB1*12:17	0.000259743
A*30:01g~DRB1*03:115	0.000581397		A*30:01g~B*42:02~DRB1*12:36	0.000259743
B*53:01g~DRB1*01:02	0.000579919		A*68:02g~B*07:212~DRB1*15:03	0.000250959
B*53:27~DRB1*01:02	0.000579919		A*68:02g~B*07:217~DRB1*15:03	0.000250959
A*30:02g~DRB1*12:17	0.000571854		A*68:02g~B*07:221~DRB1*15:03	0.000250959
A*30:02g~DRB1*12:01	0.000571854		A*68:02g~B*07:224~DRB1*15:03	0.000250959
A*30:02g~DRB1*12:06	0.000571854		A*68:02g~B*07:104~DRB1*15:03	0.000250959
A*30:02g~DRB1*12:10	0.000571854		A*66:01g~B*58:02~DRB1*13:185N	0.000245969
A*74:01g~B*35:01g	0.000567838		A*66:01g~B*58:60~DRB1*13:185N	0.000245969
B*08:72N~DRB1*03:102	0.000565248		A*29:02g~B*07:05g~DRB1*04:01	0.000240503
B*08:127~DRB1*03:102	0.000565248		A*29:02g~B*07:05g~DRB1*04:151	0.000240503
B*08:121~DRB1*03:02	0.000565248		A*29:02g~B*07:05g~DRB1*04:171	0.000240503
B*08:121~DRB1*03:102	0.000565248		A*29:02g~B*07:05g~DRB1*04:175	0.000240503
B*08:127~DRB1*03:02	0.000565248		A*33:03g~B*15:10~DRB1*11:133	0.000236745
B*08:72N~DRB1*03:02	0.000565248		A*33:03g~B*15:10~DRB1*11:140	0.000236745
A*33:03g~DRB1*01:02	0.000565247		A*33:03g~B*15:10~DRB1*11:134	0.000236745
A*33:03g~DRB1*01:57	0.000565247		A*33:03g~B*15:10~DRB1*11:141	0.000236745
A*33:03g~DRB1*01:46	0.000565247		A*23:01g~C*02:02g~DQB1*06:221	0.000226244
B*45:01g~DRB1*13:190	0.000554971		A*23:01g~C*02:02g~DQB1*06:223	0.000226244
B*45:01g~DRB1*13:186	0.000554971		A*23:01g~C*02:02g~DQB1*06:218	0.000226244
B*45:01g~DRB1*13:185N	0.000554971		A*23:01g~C*02:02g~DQB1*06:110	0.000226244
B*45:01g~DRB1*13:173	0.000554971		A*23:01g~C*02:02g~DQB1*06:41	0.000226244
B*45:01g~DRB1*13:166	0.000554971		A*23:01g~C*02:02g~DQB1*06:185	0.000226244
A*30:01g~B*53:32	0.000552491		A*23:01g~C*02:02g~DQB1*06:44	0.000226244
A*30:87~B*42:02	0.000552491		A*23:01g~C*02:02g~DQB1*06:187	0.000226244
A*30:73N~B*42:02	0.000552491		A*03:01g~B*49:33~DRB1*09:01	0.000221372
A*30:78N~B*42:02	0.000552491		A*03:01g~B*49:10~DRB1*09:01	0.000221372
A*43:01~B*15:61	0.000552491		A*03:01g~B*49:35~DRB1*09:01	0.000221372
A*43:01~B*15:282	0.000552491		A*03:01g~B*49:10~DRB1*09:21	0.000221372
A*30:62~B*42:02	0.000552491		A*03:01g~B*49:33~DRB1*09:21	0.000221372
A*30:62~B*42:01	0.000552491		A*03:01g~B*49:35~DRB1*09:21	0.000221372
A*30:73N~B*42:01	0.000552491		A*74:01g~B*41:32~DRB1*13:128	0.000216452
A*30:78N~B*42:01	0.000552491		A*74:01g~B*41:35~DRB1*13:02	0.000216452
A*30:83~B*42:02	0.000552491		A*74:01g~B*41:35~DRB1*13:128	0.000216452
B*81:01g~DRB1*12:17	0.000545061		A*74:01g~B*41:29~DRB1*13:02	0.000216452
B*81:01g~DRB1*12:06	0.000545061		A*74:01g~B*41:34~DRB1*13:128	0.000216452
B*13:02g~DRB1*12:17	0.000545061		A*74:01g~B*41:29~DRB1*13:128	0.000216452
B*13:02g~DRB1*12:10	0.000545061		A*30:83~B*42:01~DRB1*03:115	0.000216452
B*81:01g~DRB1*12:10	0.000545061		A*30:87~B*42:01~DRB1*03:115	0.000216452
B*13:02g~DRB1*12:06	0.000545061		A*74:01g~B*41:34~DRB1*13:02	0.000216452
B*81:01g~DRB1*12:01	0.000545061		A*74:01g~B*41:32~DRB1*13:02	0.000216452
B*13:02g~DRB1*12:01	0.000545061		A*74:01g~B*41:01~DRB1*13:02	0.000216452
A*26:01g~B*15:61	0.000537144		A*74:01g~B*41:01~DRB1*13:128	0.000216452
A*30:87~DRB1*11:02	0.000536109		A*02:01g~B*45:01g~DRB1*13:109	0.000205409
A*30:83~DRB1*11:02	0.000536109		A*02:01g~B*45:01g~DRB1*13:183	0.000203334
B*45:01g~DRB1*13:109	0.000532948		A*02:01g~B*45:01g~DRB1*13:121	0.000203334
A*43:01~DRB1*13:109	0.000532947		A*24:17~B*15:341~DRB1*07:33	0.000202924
A*43:01~DRB1*13:190	0.000532947		A*34:10N~B*53:01g~DRB1*03:50	0.000202924
A*43:01~DRB1*13:186	0.000532947		A*34:02~B*53:01g~DRB1*03:83	0.000202924
A*43:01~DRB1*13:185N	0.000532947		A*34:10N~B*53:01g~DRB1*03:83	0.000202924
A*43:01~DRB1*13:112	0.000532947		A*34:10N~B*53:01g~DRB1*03:68N	0.000202924
A*43:01~DRB1*13:173	0.000532947		A*24:17~B*15:341~DRB1*07:01	0.000202924
A*43:01~DRB1*13:166	0.000532947		A*24:17~B*15:341~DRB1*07:31	0.000202924
A*43:01~DRB1*13:105	0.000532947		A*24:17~B*15:341~DRB1*07:34	0.000202924
A*43:01~DRB1*13:117	0.000532947		A*66:01g~B*81:01g~DRB1*11:97	0.000202924
A*43:01~DRB1*13:01	0.000532947		A*34:10N~B*53:27~DRB1*03:50	0.000202924
B*07:217~DRB1*15:03	0.000530561		A*34:02~B*53:01g~DRB1*03:68N	0.000202924
B*07:212~DRB1*15:03	0.000530561		A*34:02~B*53:27~DRB1*03:50	0.000202924
B*07:224~DRB1*15:03	0.000530561		A*34:02~B*53:27~DRB1*03:68N	0.000202924
B*07:221~DRB1*15:03	0.000530561		A*34:10N~B*53:27~DRB1*03:68N	0.000202924
A*34:02~DRB1*13:117	0.000524872		A*34:02~B*81:07~DRB1*12:06	0.000202924
A*34:02~DRB1*13:105	0.000524872		A*34:02~B*81:07~DRB1*12:17	0.000202924
A*34:02~DRB1*13:166	0.000524872		A*34:02~B*53:27~DRB1*03:83	0.000202924
A*29:02g~B*44:183	0.00051796		A*34:10N~B*53:27~DRB1*03:83	0.000202924
A*29:02g~B*44:175	0.00051796		A*66:01g~B*81:01g~DRB1*11:157	0.000202924
A*29:02g~B*44:174	0.00051796		A*66:01g~B*81:01g~DRB1*11:117	0.000202924
A*23:01g~B*45:04	0.00051796		A*66:01g~B*81:01g~DRB1*11:166	0.000202924
A*34:02~DRB1*13:112	0.000514211		A*66:01g~B*81:01g~DRB1*11:158	0.000202924
A*34:02~DRB1*13:186	0.00051372		A*66:01g~B*81:01g~DRB1*11:100	0.000202924
A*34:02~DRB1*13:173	0.00051372		A*66:01g~B*81:01g~DRB1*11:154	0.000202924
B*44:03~DRB1*07:31	0.000507893		A*34:02~B*81:07~DRB1*12:10	0.000202924
B*44:03~DRB1*07:33	0.000507893		A*34:10N~B*53:01g~DRB1*03:01	0.000202924
B*39:10~DRB1*15:03	0.000507166		A*34:02~B*53:27~DRB1*03:01	0.000202924
B*07:104~DRB1*15:03	0.000505851		A*34:10N~B*53:27~DRB1*03:01	0.000202924
A*02:01g~B*15:16	0.00050029		A*34:02~B*53:01g~DRB1*03:50	0.000202924
A*29:44~DRB1*03:02	0.000499372		A*34:02~B*53:01g~DRB1*03:01	0.000202924
A*29:44~DRB1*03:102	0.000499338		A*66:01g~B*81:01g~DRB1*11:01	0.000202924
B*07:02g~DRB1*09:21	0.000498576		A*66:01g~B*81:01g~DRB1*11:155	0.000202924
A*23:01g~B*08:131	0.000493295		A*34:02~B*81:07~DRB1*12:01	0.000202924
A*23:01g~B*08:136	0.000493295		A*29:02g~B*44:03~DRB1*11:95	0.000200464
A*66:01g~DRB1*11:154	0.000493167		A*29:02g~B*44:03~DRB1*11:166	0.000200464
A*66:01g~DRB1*11:166	0.000493167		A*29:02g~B*44:199~DRB1*11:158	0.000200464
B*44:03~DRB1*07:34	0.000487527		A*29:02g~B*44:199~DRB1*11:01	0.000200464
B*57:70~DRB1*13:151	0.000484498		A*29:02g~B*44:199~DRB1*11:169N	0.000200464
B*57:70~DRB1*13:115	0.000484498		A*29:02g~B*44:199~DRB1*11:97	0.000200464
B*57:03~DRB1*13:151	0.000484498		A*29:02g~B*44:199~DRB1*11:154	0.000200464
B*58:02~DRB1*13:153	0.000484498		A*29:02g~B*44:199~DRB1*11:100	0.000200464
B*58:02~DRB1*13:148	0.000484498		A*29:02g~B*44:199~DRB1*11:166	0.000200464
B*58:02~DRB1*03:53	0.000484498		A*29:02g~B*44:199~DRB1*11:157	0.000200464
B*07:05g~DRB1*04:01	0.000484498		A*29:02g~B*44:03~DRB1*11:154	0.000200464
B*58:60~DRB1*03:115	0.000484498		A*29:02g~B*44:199~DRB1*11:117	0.000200464
B*58:02~DRB1*03:115	0.000484498		A*29:02g~B*44:199~DRB1*11:95	0.000200464
B*58:60~DRB1*03:102	0.000484498		A*29:02g~B*44:199~DRB1*11:155	0.000200464
B*58:25~DRB1*03:02	0.000484498		C*07:02g~DQB1*06:185~DRB1*13:01	0.00019516
B*58:25~DRB1*03:53	0.000484498		C*07:02g~DQB1*06:221~DRB1*13:01	0.00019516
B*58:02~DRB1*03:74	0.000484498		C*07:02g~DQB1*06:44~DRB1*13:01	0.00019516
B*58:25~DRB1*03:74	0.000484498		C*07:02g~DQB1*06:110~DRB1*13:01	0.00019516
B*07:05g~DRB1*04:151	0.000484498		C*07:02g~DQB1*06:218~DRB1*13:01	0.00019516
B*07:05g~DRB1*04:171	0.000484498		C*07:02g~DQB1*06:223~DRB1*13:01	0.00019516
B*58:02~DRB1*03:102	0.000484498		C*07:02g~DQB1*06:41~DRB1*13:01	0.00019516
B*07:05g~DRB1*04:175	0.000484498		C*07:02g~DQB1*06:187~DRB1*13:01	0.00019516
A*66:01g~DRB1*13:153	0.000484497		C*02:02g~DQB1*06:111~DRB1*15:03	0.000190622
A*23:01g~DRB1*11:27	0.000484497		C*02:02g~DQB1*06:227~DRB1*15:03	0.000190622
A*66:01g~DRB1*13:148	0.000484497		C*02:02g~DQB1*06:188~DRB1*15:03	0.000190622
A*02:492~DRB1*13:151	0.000484497		C*02:02g~DQB1*06:127~DRB1*15:03	0.000190622
A*02:02~DRB1*13:151	0.000484497		C*02:02g~DQB1*06:224~DRB1*15:03	0.000190622
A*02:492~DRB1*13:115	0.000484497		C*02:02g~DQB1*06:225~DRB1*15:03	0.000190622
A*02:02~DRB1*13:115	0.000484497		C*02:02g~DQB1*06:219~DRB1*15:03	0.000190622
A*02:492~DRB1*13:03	0.000484497		C*02:02g~DQB1*06:109~DRB1*15:03	0.000190622
A*02:02~DRB1*13:03	0.000484497		C*02:02g~DQB1*06:117~DRB1*15:03	0.000190622
B*08:01g~DRB1*03:100	0.000477983		C*02:02g~DQB1*06:228~DRB1*15:03	0.000190622
B*08:01g~DRB1*03:50	0.000477983		C*02:02g~DQB1*06:47~DRB1*15:03	0.000190622
B*08:01g~DRB1*03:112	0.000477983		C*02:02g~DQB1*06:200~DRB1*15:03	0.000190622
B*08:01g~DRB1*03:104	0.000477983		C*02:02g~DQB1*06:226~DRB1*15:03	0.000190622
B*08:01g~DRB1*03:83	0.000477983		C*02:02g~DQB1*06:84~DRB1*15:03	0.000190622
B*08:01g~DRB1*03:68N	0.000477983		C*02:02g~DQB1*06:116~DRB1*15:03	0.000190622
A*34:02~DRB1*13:01	0.000472078		A*68:125~B*18:99~DRB1*11:02	0.000180377
A*29:02g~DRB1*11:95	0.000469187		A*68:125~B*18:73~DRB1*11:02	0.000180377
A*29:02g~DRB1*11:154	0.000464694		A*68:125~B*18:62~DRB1*11:02	0.000180377
A*29:02g~DRB1*11:166	0.000464694		A*68:125~B*18:100~DRB1*11:02	0.000180377
A*29:02g~B*58:01g	0.000460409		A*68:02g~B*18:100~DRB1*11:02	0.000180377
A*29:69~B*58:01g	0.000460409		A*68:125~B*18:104~DRB1*11:02	0.000180377
A*29:74~B*58:01g	0.000460409		A*68:125~B*18:103~DRB1*11:02	0.000180377
A*29:34~B*58:01g	0.000460409		A*68:02g~B*18:104~DRB1*11:02	0.000180377
A*29:22~B*58:01g	0.000460409		A*68:02g~B*18:99~DRB1*11:02	0.000180377
A*29:09~B*58:01g	0.000460409		A*68:02g~B*18:73~DRB1*11:02	0.000180377
A*68:125~B*18:01g	0.000460409		A*68:02g~B*18:62~DRB1*11:02	0.000180377
A*68:02g~B*18:01g	0.000460409		A*68:02g~B*18:103~DRB1*11:02	0.000180377
A*74:13~B*57:07	0.000460409		A*74:01g~B*57:07~DRB1*13:03	0.000180377
A*30:02g~B*07:202	0.000460409		A*74:01g~B*57:07~DRB1*13:66	0.000180377
A*66:05~B*35:76	0.000460409		A*23:01g~B*08:121~DRB1*09:01	0.000180377
A*66:01g~B*35:76	0.000460409		A*23:01g~B*08:127~DRB1*09:21	0.000180377
A*30:25~B*48:06	0.000460409		A*74:01g~B*57:07~DRB1*13:170	0.000180377
A*30:02g~B*48:06	0.000460409		A*23:01g~B*08:127~DRB1*09:09	0.000180377
A*30:82~B*42:01	0.000460409		A*74:01g~B*57:03~DRB1*13:120	0.000180377
A*30:61~B*07:202	0.000460409		A*23:01g~B*08:72N~DRB1*09:01	0.000180377
A*74:13~B*57:03	0.000460409		A*74:01g~B*57:03~DRB1*13:66	0.000180377
A*68:125~B*53:32	0.000460409		A*23:01g~B*08:127~DRB1*09:01	0.000180377
A*74:18~B*57:70	0.000460409		A*23:01g~B*08:72N~DRB1*09:09	0.000180377
A*74:18~B*57:03	0.000460409		A*74:01g~B*57:07~DRB1*13:120	0.000180377
A*23:01g~B*07:80	0.000460409		A*74:01g~B*57:03~DRB1*13:115	0.000180377
A*68:02g~B*53:32	0.000460409		A*74:01g~B*57:07~DRB1*13:139	0.000180377
A*74:01g~B*44:207	0.000460409		A*74:01g~B*57:07~DRB1*13:115	0.000180377
A*74:01g~B*44:193	0.000460409		A*23:01g~B*08:121~DRB1*09:09	0.000180377
A*74:01g~B*44:198N	0.000460409		A*23:01g~B*08:121~DRB1*09:21	0.000180377
A*34:02~DRB1*03:50	0.000455273		A*74:01g~B*57:03~DRB1*13:139	0.000180377
A*34:02~DRB1*03:83	0.000455273		A*23:01g~B*08:72N~DRB1*09:21	0.000180377
A*34:02~DRB1*03:68N	0.000455273		A*74:01g~B*57:03~DRB1*13:170	0.000180377
B*81:01g~DRB1*11:169N	0.000450345		A*68:40~B*15:10~DRB1*03:01	0.000180377
B*07:02g~DRB1*09:19	0.000449891		A*68:81~B*15:10~DRB1*03:01	0.000180377
B*07:02g~DRB1*09:18	0.000449891		A*68:80~B*15:10~DRB1*03:01	0.000180377
A*02:01g~DRB1*07:33	0.000447228		A*68:82~B*15:10~DRB1*03:01	0.000180377
A*02:01g~DRB1*07:34	0.000447228		A*68:77~B*15:10~DRB1*03:01	0.000180377
A*02:01g~DRB1*07:31	0.000447228		A*68:74~B*15:10~DRB1*03:01	0.000180377
A*30:83~DRB1*13:128	0.000443501		A*68:62~B*15:10~DRB1*03:01	0.000180377
A*30:87~DRB1*13:128	0.000443501		A*68:60~B*15:10~DRB1*03:01	0.000180377
A*30:87~DRB1*03:02	0.000436048		A*68:53~B*15:10~DRB1*03:01	0.000180377
A*30:87~DRB1*03:102	0.000436048		A*68:34~B*15:10~DRB1*03:01	0.000180377
A*30:83~DRB1*03:02	0.000436048		A*68:48~B*15:10~DRB1*03:01	0.000180377
A*30:83~DRB1*03:102	0.000436048		A*68:18N~B*15:10~DRB1*03:01	0.000180377
B*15:03g~DRB1*13:145	0.000435773		A*68:44~B*15:10~DRB1*03:01	0.000180377
B*15:03g~DRB1*13:142N	0.000435771		A*68:49N~B*15:10~DRB1*03:01	0.000180377
A*33:03g~DRB1*09:19	0.000423935		A*68:64~B*15:10~DRB1*03:01	0.000180377
A*33:03g~DRB1*09:18	0.000423935		A*68:67~B*15:10~DRB1*03:01	0.000180377
A*30:87~DRB1*13:02	0.000417396		A*68:78~B*15:10~DRB1*03:01	0.000180377
A*30:83~DRB1*13:02	0.000417396		A*68:02g~C*07:02g~DQB1*06:200	0.000178891
A*74:11~DRB1*15:03	0.000415283		A*68:02g~C*07:02g~DQB1*06:225	0.000178891
A*74:15~DRB1*15:03	0.000415283		A*68:02g~C*07:02g~DQB1*06:47	0.000178891
A*74:09~DRB1*15:03	0.000415283		A*68:02g~C*07:02g~DQB1*06:84	0.000178891
A*74:12N~DRB1*15:03	0.000415283		A*68:02g~C*07:02g~DQB1*06:219	0.000178891
A*74:08~DRB1*15:03	0.000415283		A*68:02g~C*07:02g~DQB1*06:226	0.000178891
A*23:01g~B*15:54	0.000414368		A*68:02g~C*07:02g~DQB1*06:224	0.000178891
A*23:01g~B*15:61	0.000414368		A*68:02g~C*07:02g~DQB1*06:188	0.000178891
A*29:02g~B*07:213	0.000409252		A*68:02g~C*07:02g~DQB1*06:109	0.000178891
A*23:01g~DRB1*11:154	0.000405845		A*68:02g~C*07:02g~DQB1*06:228	0.000178891
A*23:01g~DRB1*11:95	0.000405845		A*68:02g~C*07:02g~DQB1*06:127	0.000178891
A*23:01g~DRB1*11:166	0.000405845		A*68:02g~C*07:02g~DQB1*06:227	0.000178891
A*23:01g~DRB1*11:155	0.000405845		A*68:02g~C*07:02g~DQB1*06:111	0.000178891
A*23:01g~DRB1*11:157	0.000405845		A*68:02g~C*07:02g~DQB1*06:116	0.000178891
A*23:01g~DRB1*11:169N	0.000405845		A*68:02g~C*07:02g~DQB1*06:117	0.000178891
A*23:01g~DRB1*11:158	0.000405845		A*33:03g~B*15:312~DRB1*11:01	0.000177559
B*08:01g~DRB1*03:107	0.000398702		A*33:03g~B*15:312~DRB1*11:117	0.000177559
B*58:60~DRB1*13:121	0.00039861		A*33:03g~B*15:312~DRB1*11:155	0.000177559
B*58:60~DRB1*13:183	0.00039861		A*33:03g~B*15:10~DRB1*11:169N	0.000177559
B*58:02~DRB1*13:183	0.00039861		A*33:03g~B*15:312~DRB1*11:100	0.000177559
A*34:02~DRB1*03:01	0.000397607		A*33:03g~B*15:10~DRB1*11:155	0.000177559
A*02:34~B*13:02g	0.000394636		A*33:03g~B*15:312~DRB1*11:157	0.000177559
A*02:174~B*13:02g	0.000394636		A*33:03g~B*15:312~DRB1*11:158	0.000177559
A*02:35~B*13:02g	0.000394636		A*33:03g~B*15:312~DRB1*11:97	0.000177559
A*02:190~B*13:02g	0.000394636		A*33:03g~B*15:10~DRB1*11:157	0.000177559
A*02:334~B*13:02g	0.000394636		A*33:03g~B*15:10~DRB1*11:158	0.000177559
A*23:67~B*45:01g	0.000394636		A*33:03g~B*15:312~DRB1*11:169N	0.000177559
B*13:02g~DRB1*07:26N	0.000387599		A*33:01g~B*15:01g~DRB1*13:190	0.000177097
B*13:02g~DRB1*07:25	0.000387599		A*33:01g~B*15:01g~DRB1*13:117	0.000177097
A*02:01g~DRB1*01:02	0.000386933		A*33:01g~B*15:01g~DRB1*13:105	0.000177097
B*44:199~DRB1*11:155	0.000385396		A*33:01g~B*15:01g~DRB1*13:183	0.000177097
B*44:199~DRB1*11:157	0.000385396		A*33:01g~B*15:01g~DRB1*13:112	0.000177097
B*44:199~DRB1*11:95	0.000385396		A*33:01g~B*15:01g~DRB1*13:01	0.000177097
B*44:199~DRB1*11:97	0.000385396		A*33:01g~B*15:01g~DRB1*13:186	0.000177097
B*44:199~DRB1*11:166	0.000385396		A*33:01g~B*15:01g~DRB1*13:121	0.000177097
B*44:199~DRB1*11:01	0.000385396		A*33:01g~B*15:01g~DRB1*13:173	0.000177097
B*44:199~DRB1*11:100	0.000385396		A*33:01g~B*15:01g~DRB1*13:166	0.000177097
B*44:199~DRB1*11:169N	0.000385396		A*33:01g~B*15:01g~DRB1*13:185N	0.000177097
B*44:199~DRB1*11:158	0.000385396		A*23:01g~DQB1*06:185~DRB1*13:01	0.00017507
B*44:199~DRB1*11:117	0.000385396		A*23:01g~DQB1*06:221~DRB1*13:01	0.00017507
B*44:199~DRB1*11:154	0.000385396		A*23:01g~DQB1*06:218~DRB1*13:01	0.00017507
A*66:01g~DRB1*13:185N	0.000381022		A*23:01g~DQB1*06:187~DRB1*13:01	0.00017507
A*23:01g~DRB1*13:117	0.000380677		A*23:01g~DQB1*06:41~DRB1*13:01	0.00017507
A*03:01g~B*49:35	0.000376698		A*23:01g~DQB1*06:110~DRB1*13:01	0.00017507
A*03:01g~B*49:33	0.000376698		A*23:01g~DQB1*06:44~DRB1*13:01	0.00017507
A*03:01g~B*49:10	0.000376698		A*23:01g~DQB1*06:223~DRB1*13:01	0.00017507
B*07:233~DRB1*15:03	0.000369061		A*26:01g~B*15:03g~DRB1*11:117	0.000172178
B*07:230~DRB1*15:03	0.000369061		A*26:01g~B*15:03g~DRB1*11:01	0.000172178
B*07:240~DRB1*15:03	0.000369061		A*26:01g~B*15:03g~DRB1*11:154	0.000172178
B*07:241~DRB1*15:03	0.000369061		A*26:01g~B*15:03g~DRB1*11:166	0.000172178
B*07:231N~DRB1*15:03	0.000369061		A*26:01g~B*15:03g~DRB1*11:155	0.000172178
A*74:01g~B*41:01	0.000368327		A*26:01g~B*15:03g~DRB1*11:169N	0.000172178
A*74:01g~B*41:32	0.000368327		A*26:01g~B*15:03g~DRB1*11:100	0.000172178
A*74:01g~B*41:29	0.000368327		A*26:01g~B*15:03g~DRB1*11:158	0.000172178
A*74:01g~B*41:34	0.000368327		A*26:01g~B*15:03g~DRB1*11:95	0.000172178
A*74:01g~B*41:35	0.000368327		A*26:01g~B*15:03g~DRB1*11:97	0.000172178
A*02:01g~DRB1*13:117	0.000365965		A*26:01g~B*15:03g~DRB1*11:157	0.000172178
A*02:01g~DRB1*13:186	0.000365965		A*68:02g~DQB1*06:111~DRB1*15:03	0.000170999
A*02:01g~DRB1*13:166	0.000365965		A*68:02g~DQB1*06:117~DRB1*15:03	0.000170999
A*02:01g~DRB1*13:190	0.000365965		A*68:02g~DQB1*06:188~DRB1*15:03	0.000170999
A*02:01g~DRB1*13:105	0.000365965		A*68:02g~DQB1*06:227~DRB1*15:03	0.000170999
A*02:01g~DRB1*13:185N	0.000365965		A*68:02g~DQB1*06:224~DRB1*15:03	0.000170999
A*02:01g~DRB1*13:112	0.000365965		A*68:02g~DQB1*06:228~DRB1*15:03	0.000170999
A*02:01g~DRB1*13:173	0.000365965		A*68:02g~DQB1*06:47~DRB1*15:03	0.000170999
A*74:01g~DRB1*13:117	0.000364408		A*68:02g~DQB1*06:225~DRB1*15:03	0.000170999
A*74:01g~DRB1*13:01	0.000364408		A*68:02g~DQB1*06:109~DRB1*15:03	0.000170999
A*74:01g~DRB1*13:112	0.000364408		A*68:02g~DQB1*06:84~DRB1*15:03	0.000170999
A*74:01g~DRB1*13:105	0.000364408		A*68:02g~DQB1*06:127~DRB1*15:03	0.000170999
A*74:01g~DRB1*13:186	0.000364408		A*68:02g~DQB1*06:226~DRB1*15:03	0.000170999
A*74:01g~DRB1*13:183	0.000364408		A*68:02g~DQB1*06:116~DRB1*15:03	0.000170999
A*74:01g~DRB1*13:173	0.000364408		A*68:02g~DQB1*06:219~DRB1*15:03	0.000170999
A*74:01g~DRB1*13:166	0.000364408		A*68:02g~DQB1*06:200~DRB1*15:03	0.000170999
A*74:01g~DRB1*13:121	0.000364408		A*03:01g~B*18:01g~DRB1*07:01	0.000169103
B*44:03~DRB1*11:162	0.000363374		A*03:01g~B*18:01g~DRB1*07:31	0.000169103
B*58:49~DRB1*15:03	0.000363374		A*03:01g~B*18:01g~DRB1*07:34	0.000169103
B*53:01g~DRB1*01:43	0.000363374		A*03:01g~B*18:01g~DRB1*07:33	0.000169103
B*53:27~DRB1*01:43	0.000363374		A*30:02g~B*45:01g~DRB1*01:34	0.000162339
B*44:199~DRB1*07:34	0.000363374		A*30:02g~B*45:01g~DRB1*01:35	0.000162339
B*44:199~DRB1*07:01	0.000363374		A*30:01g~B*44:03~DRB1*11:155	0.000162339
B*44:199~DRB1*07:33	0.000363374		A*30:01g~B*44:03~DRB1*11:01	0.000162339
B*44:199~DRB1*07:31	0.000363374		A*30:01g~B*44:03~DRB1*11:154	0.000162339
B*82:01~DRB1*04:157N	0.000363374		A*30:01g~B*44:03~DRB1*11:162	0.000162339
B*82:02~DRB1*04:157N	0.000363374		A*30:01g~B*44:03~DRB1*11:158	0.000162339
B*82:01~DRB1*04:182	0.000363374		A*30:01g~B*44:03~DRB1*11:97	0.000162339
B*82:02~DRB1*04:182	0.000363374		A*30:01g~B*44:03~DRB1*11:100	0.000162339
B*82:01~DRB1*04:23	0.000363374		A*30:01g~B*44:03~DRB1*11:169N	0.000162339
B*82:02~DRB1*04:23	0.000363374		A*30:01g~B*44:03~DRB1*11:117	0.000162339
B*15:10~DRB1*11:141	0.000363374		A*30:01g~B*44:03~DRB1*11:95	0.000162339
B*15:10~DRB1*11:134	0.000363374		A*30:01g~B*44:03~DRB1*11:157	0.000162339
B*15:10~DRB1*11:133	0.000363374		A*34:02~B*58:63~DRB1*04:05	0.000162339
B*15:10~DRB1*11:140	0.000363374		A*68:125~B*14:40~DRB1*07:31	0.000162339
B*15:10~DRB1*13:96	0.000363374		A*34:02~B*58:49~DRB1*04:178N	0.000162339
B*15:10~DRB1*13:99	0.000363374		A*30:01g~B*44:03~DRB1*11:166	0.000162339
B*15:90~DRB1*13:99	0.000363374		A*68:125~B*14:40~DRB1*07:34	0.000162339
B*15:90~DRB1*13:96	0.000363374		A*34:02~B*58:63~DRB1*04:178N	0.000162339
B*15:10~DRB1*13:39	0.000363374		A*68:125~B*14:40~DRB1*07:01	0.000162339
B*15:90~DRB1*13:39	0.000363374		A*68:125~B*14:01~DRB1*07:31	0.000162339
B*15:90~DRB1*13:02	0.000363374		A*29:01~B*15:61~DRB1*13:02	0.000162339
A*33:10~DRB1*03:68N	0.000363373		A*29:01~B*15:282~DRB1*13:145	0.000162339
A*33:03g~DRB1*03:15	0.000363373		A*29:01~B*15:61~DRB1*13:142N	0.000162339
A*33:10~DRB1*03:15	0.000363373		A*68:125~B*14:01~DRB1*07:33	0.000162339
A*34:10N~DRB1*03:01	0.000363373		A*29:01~B*15:282~DRB1*13:142N	0.000162339
A*33:03g~DRB1*03:83	0.000363373		A*34:02~B*58:49~DRB1*04:05	0.000162339
A*33:10~DRB1*03:83	0.000363373		A*29:01~B*15:61~DRB1*13:128	0.000162339
A*34:10N~DRB1*03:50	0.000363373		A*29:01~B*15:282~DRB1*13:128	0.000162339
A*34:10N~DRB1*03:68N	0.000363373		A*29:01~B*15:282~DRB1*13:02	0.000162339
A*34:10N~DRB1*03:83	0.000363373		A*68:125~B*14:40~DRB1*07:33	0.000162339
A*34:02~DRB1*13:190	0.000363373		A*68:125~B*14:01~DRB1*07:01	0.000162339
A*33:03g~DRB1*03:68N	0.000363373		A*68:125~B*14:40~DRB1*07:35	0.000162339
A*34:09~DRB1*12:10	0.000363373		A*68:125~B*14:01~DRB1*07:35	0.000162339
A*33:10~DRB1*03:01	0.000363373		A*68:125~B*14:01~DRB1*07:34	0.000162339
A*33:03g~DRB1*03:01	0.000363373		A*29:01~B*15:61~DRB1*13:145	0.000162339
A*34:09~DRB1*12:06	0.000363373		A*30:87~B*81:07~DRB1*15:03	0.000162339
A*34:09~DRB1*12:01	0.000363373		A*30:83~B*81:07~DRB1*15:03	0.000162339
A*34:09~DRB1*12:17	0.000363373		A*68:02g~B*14:40~DRB1*07:35	0.000162339
A*30:25~DRB1*07:01	0.000362848		A*68:02g~B*14:40~DRB1*07:01	0.000162339
A*68:125~DRB1*11:01	0.000361281		A*68:02g~B*14:40~DRB1*07:31	0.000162339
B*15:03g~DRB1*11:95	0.000356767		A*68:02g~B*14:40~DRB1*07:33	0.000162339
B*15:03g~DRB1*11:166	0.000356767		A*68:02g~B*14:01~DRB1*07:35	0.000162339
B*15:03g~DRB1*11:154	0.000356767		A*68:02g~B*14:01~DRB1*07:34	0.000162339
A*68:125~DRB1*11:155	0.000355712		A*68:02g~B*14:01~DRB1*07:31	0.000162339
A*68:125~DRB1*11:158	0.000355712		A*68:02g~B*14:40~DRB1*07:34	0.000162339
A*68:125~DRB1*11:157	0.000355712		A*68:02g~B*14:01~DRB1*07:33	0.000162339
A*68:125~DRB1*11:169N	0.000355712		A*23:67~B*39:99~DRB1*11:02	0.000154609
B*58:02~DRB1*13:109	0.000348304		A*23:67~B*39:10~DRB1*11:02	0.000154609
A*30:66~B*53:27	0.000345307		A*23:67~B*39:89~DRB1*11:02	0.000154609
A*34:02~B*08:104	0.000345307		A*30:02g~B*08:01g~DRB1*03:112	0.000152369
A*34:02~B*08:131	0.000345307		A*30:02g~B*08:01g~DRB1*03:50	0.000152369
A*30:70N~B*53:01g	0.000345307		A*30:02g~B*08:01g~DRB1*03:107	0.000152369
A*30:66~B*53:01g	0.000345307		A*30:02g~B*08:01g~DRB1*03:83	0.000152369
A*30:70N~B*53:27	0.000345307		A*30:02g~B*08:01g~DRB1*03:104	0.000152369
A*30:02g~B*58:49	0.000345307		A*30:02g~B*08:01g~DRB1*03:100	0.000152369
A*68:125~DRB1*11:117	0.000343959		A*30:02g~B*08:01g~DRB1*03:68N	0.000152369
A*68:125~DRB1*11:97	0.000343959		A*30:02g~B*08:01g~DRB1*03:01	0.000152313
A*68:125~DRB1*11:100	0.000343959		A*34:02~B*44:03~DRB1*13:166	0.000146556
A*03:01g~B*08:127	0.000340302		A*34:02~B*44:03~DRB1*13:186	0.000146556
A*03:01g~B*08:72N	0.000340302		A*34:02~B*44:03~DRB1*13:01	0.000146556
A*03:01g~B*08:121	0.000340302		A*34:02~B*44:03~DRB1*13:112	0.000146556
B*58:60~DRB1*13:109	0.000333249		A*34:02~B*44:03~DRB1*13:105	0.000146556
A*68:02g~DRB1*11:155	0.000328345		A*34:02~B*44:03~DRB1*13:117	0.000146556
A*68:02g~DRB1*11:158	0.000328345		A*34:02~B*44:03~DRB1*13:173	0.000146556
A*68:02g~DRB1*11:157	0.000328345		A*29:34~B*44:03~DRB1*13:02	0.000135283
A*68:02g~DRB1*11:169N	0.000328343		A*29:34~B*44:03~DRB1*13:23	0.000135283
A*68:02g~B*07:224	0.000324762		A*29:02g~B*44:03~DRB1*13:36	0.000135283
A*68:02g~B*07:212	0.000324762		A*29:34~B*44:03~DRB1*13:36	0.000135283
A*68:02g~B*07:217	0.000324762		A*29:34~B*44:03~DRB1*13:37	0.000135283
A*68:02g~B*07:221	0.000324762		A*29:02g~B*44:03~DRB1*13:97	0.000135283
B*18:100~DRB1*11:02	0.000322999		A*29:34~B*44:03~DRB1*13:97	0.000135283
B*15:03g~DRB1*11:178	0.000322999		A*80:01~B*57:70~DRB1*03:104	0.000135283
B*18:99~DRB1*11:02	0.000322999		A*66:01g~B*58:02~DRB1*13:109	0.000135283
B*18:73~DRB1*11:02	0.000322999		A*80:01~B*57:03~DRB1*03:107	0.000135283
B*18:62~DRB1*11:02	0.000322999		A*80:01~B*57:70~DRB1*03:107	0.000135283
B*18:104~DRB1*11:02	0.000322999		A*80:01~B*57:03~DRB1*03:108	0.000135283
B*18:103~DRB1*11:02	0.000322999		A*80:01~B*57:70~DRB1*03:108	0.000135283
B*44:193~DRB1*09:09	0.000322999		A*80:01~B*57:03~DRB1*03:112	0.000135283
B*44:198N~DRB1*09:01	0.000322999		A*80:01~B*57:70~DRB1*03:112	0.000135283
B*44:193~DRB1*09:01	0.000322999		A*80:01~B*57:03~DRB1*03:114	0.000135283
B*44:198N~DRB1*09:09	0.000322999		A*80:01~B*57:70~DRB1*03:114	0.000135283
B*44:193~DRB1*09:21	0.000322999		A*80:01~B*57:03~DRB1*03:116	0.000135283
B*44:198N~DRB1*09:21	0.000322999		A*80:01~B*57:70~DRB1*03:116	0.000135283
B*53:32~DRB1*09:09	0.000322999		A*80:01~B*57:03~DRB1*03:104	0.000135283
B*53:32~DRB1*09:01	0.000322999		A*80:01~B*57:70~DRB1*03:100	0.000135283
B*08:121~DRB1*03:115	0.000322999		A*80:01~B*57:03~DRB1*03:100	0.000135283
B*53:32~DRB1*09:21	0.000322999		A*66:01g~B*58:60~DRB1*13:109	0.000135283
B*08:72N~DRB1*03:115	0.000322999		A*29:02g~B*44:03~DRB1*13:02	0.000135283
B*08:127~DRB1*03:115	0.000322999		A*80:01~B*57:70~DRB1*03:01	0.000135283
B*44:03~DRB1*09:21	0.000322999		A*80:01~B*57:03~DRB1*03:01	0.000135283
B*44:03~DRB1*09:01	0.000322999		A*74:01g~B*35:269~DRB1*04:05	0.000135283
B*44:03~DRB1*09:09	0.000322999		A*29:34~B*44:03~DRB1*13:38	0.000135283
A*29:02g~DRB1*04:151	0.000322998		A*29:02g~B*44:03~DRB1*13:37	0.000135283
A*29:02g~DRB1*04:171	0.000322998		A*29:02g~B*44:03~DRB1*13:23	0.000135283
A*29:02g~DRB1*04:175	0.000322998		A*74:13~B*35:01g~DRB1*04:05	0.000135283
A*29:02g~DRB1*04:01	0.000322998		A*80:01~B*57:03~DRB1*03:117	0.000135283
A*30:87~B*53:01g	0.000322216		A*80:01~B*57:70~DRB1*03:117	0.000135283
A*30:83~B*53:01g	0.000322216		A*80:01~B*57:03~DRB1*03:50	0.000135283
A*74:01g~DRB1*13:37	0.000321103		A*80:01~B*57:70~DRB1*03:50	0.000135283
A*74:01g~DRB1*13:36	0.000321103		A*80:01~B*57:03~DRB1*03:68N	0.000135283
A*74:01g~DRB1*13:38	0.000321103		A*80:01~B*57:70~DRB1*03:68N	0.000135283
A*74:01g~DRB1*13:97	0.000321103		A*80:01~B*57:03~DRB1*03:83	0.000135283
A*74:01g~DRB1*13:23	0.000321103		A*80:01~B*57:70~DRB1*03:83	0.000135283
A*68:02g~DRB1*11:117	0.000320844		A*74:01g~B*35:197~DRB1*04:05	0.000135283
A*68:02g~DRB1*11:97	0.000320844		A*74:01g~B*35:64~DRB1*04:05	0.000135283
A*68:02g~DRB1*11:100	0.000320844		A*74:01g~B*35:29~DRB1*04:05	0.000135283
A*30:01g~B*81:07	0.000320157		A*29:02g~B*44:03~DRB1*13:38	0.000135283
A*29:44~DRB1*03:115	0.000320079		A*74:01g~B*35:78~DRB1*04:05	0.000135283
A*29:65~DRB1*03:115	0.000319927		A*74:01g~B*35:199~DRB1*04:05	0.000135283
A*29:72~DRB1*03:115	0.000319927		A*74:01g~B*35:34~DRB1*04:05	0.000135283
A*29:64~DRB1*03:115	0.000319927		A*66:01g~B*53:32~DRB1*11:97	0.000135283
A*29:72~DRB1*03:02	0.000319752		A*66:01g~B*53:32~DRB1*11:169N	0.000135283
A*29:64~DRB1*03:02	0.000319752		A*74:01g~B*35:08~DRB1*04:05	0.000135283
A*29:65~DRB1*03:02	0.000319752		A*74:01g~B*35:05~DRB1*04:05	0.000135283
A*29:72~DRB1*03:102	0.000319727		A*66:01g~B*53:32~DRB1*11:158	0.000135283
A*29:65~DRB1*03:102	0.000319727		A*66:01g~B*53:32~DRB1*11:157	0.000135283
A*29:64~DRB1*03:102	0.000319727		A*74:01g~B*35:15~DRB1*04:05	0.000135283
A*68:18N~C*16:01g	0.000315657		A*66:01g~B*53:32~DRB1*11:155	0.000135283
A*68:81~C*16:01g	0.000315657		A*74:01g~B*35:54~DRB1*04:05	0.000135283
A*68:80~C*16:01g	0.000315657		A*74:01g~B*35:49~DRB1*04:05	0.000135283
A*68:82~C*16:01g	0.000315657		A*66:01g~B*53:32~DRB1*11:117	0.000135283
A*68:78~C*16:01g	0.000315657		A*66:01g~B*53:32~DRB1*11:01	0.000135283
A*68:77~C*16:01g	0.000315657		A*66:01g~B*53:32~DRB1*11:100	0.000135283
A*68:74~C*16:01g	0.000315657		A*74:01g~B*35:51~DRB1*04:05	0.000135283
A*68:67~C*16:01g	0.000315657		A*74:01g~B*35:124~DRB1*04:05	0.000135283
A*68:62~C*16:01g	0.000315657		A*29:34~B*44:37~DRB1*13:02	0.000135283
A*68:49N~C*16:01g	0.000315657		A*29:34~B*44:37~DRB1*13:36	0.000135283
A*68:48~C*16:01g	0.000315657		A*29:34~B*44:37~DRB1*13:38	0.000135283
A*68:44~C*16:01g	0.000315657		A*29:34~B*44:37~DRB1*13:37	0.000135283
A*68:34~C*16:01g	0.000315657		A*74:18~B*44:03~DRB1*13:02	0.000135283
A*68:60~C*16:01g	0.000315657		A*29:34~B*44:37~DRB1*13:97	0.000135283
A*68:53~C*16:01g	0.000315657		A*74:18~B*44:193~DRB1*13:128	0.000135283
A*68:64~C*16:01g	0.000315657		A*29:34~B*44:37~DRB1*13:23	0.000135283
A*68:40~C*16:01g	0.000315657		A*74:18~B*44:207~DRB1*13:02	0.000135283
A*68:02g~B*07:104	0.000305899		A*74:18~B*44:03~DRB1*13:128	0.000135283
A*30:87~B*35:01g	0.00030387		A*29:02g~B*44:37~DRB1*13:38	0.000135283
A*30:83~B*35:01g	0.00030387		A*23:01g~B*82:02~DRB1*13:147	0.000135283
C*07:02g~DRB1*13:233	0.000301387		A*23:01g~B*82:01~DRB1*13:147	0.000135283
C*07:02g~DRB1*13:215	0.000301387		A*29:02g~B*44:37~DRB1*13:02	0.000135283
C*07:02g~DRB1*13:190	0.000301387		A*23:01g~B*82:01~DRB1*13:148	0.000135283
C*07:02g~DRB1*13:117	0.000301387		A*23:01g~B*82:01~DRB1*13:105	0.000135283
B*41:32~DRB1*13:02	0.000290699		A*23:01g~B*82:02~DRB1*13:143	0.000135283
B*41:29~DRB1*13:02	0.000290699		A*23:01g~B*82:02~DRB1*13:148	0.000135283
B*41:29~DRB1*13:128	0.000290699		A*23:01g~B*82:01~DRB1*13:153	0.000135283
B*41:01~DRB1*13:128	0.000290699		A*23:01g~B*82:02~DRB1*13:153	0.000135283
B*41:32~DRB1*13:128	0.000290699		A*23:01g~B*82:02~DRB1*13:105	0.000135283
B*41:35~DRB1*13:128	0.000290699		A*23:01g~B*82:01~DRB1*13:112	0.000135283
B*41:34~DRB1*13:128	0.000290699		A*23:01g~B*82:02~DRB1*13:01	0.000135283
B*41:35~DRB1*13:02	0.000290699		A*74:18~B*44:193~DRB1*13:02	0.000135283
B*41:34~DRB1*13:02	0.000290699		A*74:18~B*44:198N~DRB1*13:02	0.000135283
B*41:01~DRB1*13:02	0.000290699		A*23:01g~B*82:01~DRB1*13:01	0.000135283
B*49:01g~DRB1*11:01	0.000290699		A*23:01g~B*82:01~DRB1*13:109	0.000135283
B*58:06~DRB1*13:14	0.000290699		A*23:01g~B*82:02~DRB1*13:109	0.000135283
B*49:11~DRB1*11:20	0.000290699		A*23:01g~B*82:02~DRB1*13:112	0.000135283
B*49:01g~DRB1*11:19	0.000290699		A*23:01g~B*82:01~DRB1*13:117	0.000135283
B*58:02~DRB1*13:63	0.000290699		A*23:01g~B*82:02~DRB1*13:117	0.000135283
B*58:06~DRB1*13:63	0.000290699		A*23:01g~B*82:01~DRB1*13:143	0.000135283
B*49:01g~DRB1*11:20	0.000290699		A*29:02g~B*44:37~DRB1*13:97	0.000135283
B*49:11~DRB1*11:19	0.000290699		A*29:02g~B*44:37~DRB1*13:37	0.000135283
B*49:11~DRB1*11:01	0.000290699		A*29:02g~B*44:37~DRB1*13:36	0.000135283
B*49:11~DRB1*11:14	0.000290699		A*29:02g~B*44:37~DRB1*13:23	0.000135283
B*49:01g~DRB1*11:14	0.000290699		A*74:18~B*44:207~DRB1*13:128	0.000135283
B*49:11~DRB1*11:09	0.000290699		A*74:18~B*44:198N~DRB1*13:128	0.000135283
B*49:01g~DRB1*11:09	0.000290699		A*23:01g~B*15:03g~DRB1*11:155	0.000132823
B*58:02~DRB1*13:05	0.000290699		A*23:01g~B*15:03g~DRB1*11:100	0.000132823
B*58:06~DRB1*13:02	0.000290699		A*23:01g~B*15:03g~DRB1*11:157	0.000132823
B*58:02~DRB1*13:02	0.000290699		A*23:01g~B*15:03g~DRB1*11:154	0.000132823
B*58:06~DRB1*13:05	0.000290699		A*23:01g~B*15:03g~DRB1*11:117	0.000132823
B*58:02~DRB1*13:23	0.000290699		A*23:01g~B*15:03g~DRB1*11:169N	0.000132823
B*58:06~DRB1*13:23	0.000290699		A*23:01g~B*15:03g~DRB1*11:95	0.000132823
B*58:02~DRB1*13:14	0.000290699		A*23:01g~B*15:03g~DRB1*11:166	0.000132823
B*49:35~DRB1*09:01	0.000290699		A*23:01g~B*15:03g~DRB1*11:158	0.000132823
B*14:40~DRB1*07:33	0.000290699		A*23:01g~B*15:03g~DRB1*11:97	0.000132823
B*49:10~DRB1*09:01	0.000290699		A*30:62~B*42:02~DRB1*12:06	0.000129871
B*49:33~DRB1*09:01	0.000290699		A*30:73N~B*42:02~DRB1*12:17	0.000129871
B*49:35~DRB1*09:21	0.000290699		A*30:62~B*42:02~DRB1*12:10	0.000129871
B*49:33~DRB1*09:21	0.000290699		A*30:78N~B*42:02~DRB1*12:01	0.000129871
B*49:10~DRB1*09:21	0.000290699		A*30:78N~B*42:02~DRB1*12:06	0.000129871
B*14:40~DRB1*07:31	0.000290699		A*30:62~B*42:02~DRB1*12:36	0.000129871
B*14:01~DRB1*07:34	0.000290699		A*66:02~B*07:104~DRB1*15:03	0.000129871
B*14:40~DRB1*07:01	0.000290699		A*66:02~B*07:212~DRB1*15:03	0.000129871
B*14:40~DRB1*07:34	0.000290699		A*66:02~B*07:217~DRB1*15:03	0.000129871
B*14:01~DRB1*07:33	0.000290699		A*30:73N~B*42:02~DRB1*12:36	0.000129871
B*14:40~DRB1*07:35	0.000290699		A*30:62~B*42:02~DRB1*12:17	0.000129871
B*14:01~DRB1*07:31	0.000290699		A*66:02~B*07:221~DRB1*15:03	0.000129871
B*14:01~DRB1*07:35	0.000290699		A*30:78N~B*42:02~DRB1*12:36	0.000129871
A*68:125~DRB1*07:35	0.000290698		A*30:78N~B*42:02~DRB1*12:17	0.000129871
A*68:02g~DRB1*07:35	0.000290698		A*30:73N~B*42:02~DRB1*12:01	0.000129871
A*30:02g~B*08:121	0.000276245		A*66:02~B*07:233~DRB1*15:03	0.000129871
A*30:02g~B*08:127	0.000276245		A*30:73N~B*42:02~DRB1*12:06	0.000129871
A*30:02g~B*08:72N	0.000276245		A*66:02~B*07:224~DRB1*15:03	0.000129871
A*29:44~B*42:01	0.000276245		A*66:02~B*07:232~DRB1*15:03	0.000129871
A*29:64~B*42:01	0.000276245		A*66:02~B*07:231N~DRB1*15:03	0.000129871
A*29:72~B*42:01	0.000276245		A*66:02~B*07:241~DRB1*15:03	0.000129871
A*29:65~B*42:01	0.000276245		A*66:02~B*07:234~DRB1*15:03	0.000129871
A*68:125~B*44:03	0.000276245		A*66:02~B*07:240~DRB1*15:03	0.000129871
A*68:02g~B*44:03	0.000276245		A*30:62~B*42:02~DRB1*12:01	0.000129871
A*68:125~B*44:193	0.000276245		A*66:02~B*07:230~DRB1*15:03	0.000129871
A*68:125~B*44:198N	0.000276245		A*30:73N~B*42:02~DRB1*12:10	0.000129871
A*68:125~B*44:207	0.000276245		A*30:78N~B*42:02~DRB1*12:10	0.000129871
A*68:125~B*44:222	0.000276245		A*74:01g~B*57:70~DRB1*13:183	0.000120251
A*30:02g~B*08:149	0.000276245		A*74:01g~B*57:03~DRB1*13:166	0.000120251
A*30:02g~B*08:142	0.000276245		A*74:01g~B*57:03~DRB1*13:173	0.000120251
A*30:02g~B*08:131	0.000276245		A*74:01g~B*57:70~DRB1*13:01	0.000120251
A*30:02g~B*08:136	0.000276245		A*74:01g~B*57:03~DRB1*13:183	0.000120251
A*29:32~B*42:01	0.000276245		A*74:01g~B*57:70~DRB1*13:166	0.000120251
A*29:66~B*42:01	0.000276245		A*74:01g~B*57:03~DRB1*13:01	0.000120251
A*80:01~B*18:99	0.000276245		A*74:01g~B*57:70~DRB1*13:121	0.000120251
A*80:01~B*18:73	0.000276245		A*74:01g~B*57:70~DRB1*13:117	0.000120251
A*80:01~B*18:62	0.000276245		A*74:01g~B*57:03~DRB1*13:121	0.000120251
A*80:01~B*18:89	0.000276245		A*74:01g~B*57:03~DRB1*13:117	0.000120251
A*68:02g~B*44:222	0.000276245		A*74:01g~B*57:70~DRB1*13:173	0.000120251
A*68:02g~B*44:207	0.000276245		A*74:01g~B*57:03~DRB1*13:105	0.000120251
A*68:02g~B*44:198N	0.000276245		A*74:01g~B*57:70~DRB1*13:112	0.000120251
A*68:02g~B*44:193	0.000276245		A*74:01g~B*57:03~DRB1*13:112	0.000120251
A*80:01~B*18:103	0.000276245		A*74:01g~B*57:70~DRB1*13:186	0.000120251
A*80:01~B*18:100	0.000276245		A*74:01g~B*57:70~DRB1*13:105	0.000120251
A*80:01~B*18:14	0.000276245		A*74:01g~B*57:03~DRB1*13:186	0.000120251
A*23:01g~DRB1*11:133	0.00027253		A*29:02g~B*07:213~DRB1*04:151	0.000120251
A*23:01g~DRB1*11:134	0.00027253		A*29:02g~B*07:213~DRB1*04:171	0.000120251
A*23:01g~DRB1*11:140	0.00027253		A*29:02g~B*07:213~DRB1*04:01	0.000120251
A*23:01g~DRB1*11:141	0.00027253		A*29:02g~B*07:213~DRB1*04:175	0.000120251
A*29:02g~DRB1*01:43	0.00027253		A*02:07g~C*03:04g~DRB1*03:01	0.000112351
A*29:02g~DRB1*01:46	0.00027253		A*30:01g~B*35:01g~DRB1*13:186	0.000109891
A*29:02g~DRB1*01:57	0.00027253		A*30:01g~B*35:01g~DRB1*13:184	0.000109891
A*29:02g~DRB1*01:02	0.00027253		A*30:01g~B*35:01g~DRB1*13:185N	0.000109891
B*53:01g~DRB1*15:03	0.000267954		A*30:01g~B*35:01g~DRB1*13:190	0.000109891
B*53:27~DRB1*15:03	0.000267954		A*30:01g~B*35:01g~DRB1*13:178	0.000109891
DQB1*06:03~DRB1*13:215	0.000267754		A*30:01g~B*35:01g~DRB1*13:112	0.000109891
DQB1*06:03~DRB1*13:117	0.000267754		A*30:01g~B*35:01g~DRB1*13:166	0.000109891
DQB1*06:03~DRB1*13:233	0.000267754		A*30:01g~B*35:01g~DRB1*13:105	0.000109891
DQB1*06:03~DRB1*13:190	0.000267754		A*30:01g~B*35:01g~DRB1*13:183	0.000109891
B*44:03~DRB1*13:02	0.000266955		A*30:01g~B*35:01g~DRB1*13:121	0.000109891
B*45:01g~DRB1*13:121	0.000264272		A*30:01g~B*35:01g~DRB1*13:173	0.000109891
B*45:01g~DRB1*13:183	0.000264272		A*30:01g~B*35:01g~DRB1*13:117	0.000109891
A*33:01g~DRB1*13:121	0.000264271		A*30:01g~B*35:01g~DRB1*13:01	0.000109891
A*33:01g~DRB1*13:112	0.000264271		A*24:02g~B*07:241~DRB1*15:03	0.000109795
A*33:01g~DRB1*13:105	0.000264271		A*24:02g~B*07:224~DRB1*15:03	0.000109795
A*33:01g~DRB1*13:166	0.000264271		A*24:02g~B*07:104~DRB1*15:03	0.000109795
A*33:01g~DRB1*13:186	0.000264271		A*24:02g~B*07:233~DRB1*15:03	0.000109795
A*33:01g~DRB1*13:183	0.000264271		A*24:02g~B*07:230~DRB1*15:03	0.000109795
A*33:01g~DRB1*13:173	0.000264271		A*24:02g~B*07:240~DRB1*15:03	0.000109795
A*33:01g~DRB1*13:117	0.000264271		A*24:02g~B*07:217~DRB1*15:03	0.000109795
A*33:01g~DRB1*13:190	0.000264271		A*24:02g~B*07:212~DRB1*15:03	0.000109795
A*33:01g~DRB1*13:185N	0.000264271		A*24:02g~B*07:231N~DRB1*15:03	0.000109795
B*18:92~DRB1*08:04	0.000264222		A*24:02g~B*07:221~DRB1*15:03	0.000109795
B*18:90~DRB1*08:04	0.000264222		A*29:32~B*42:01~DRB1*03:02	0.000108226
B*18:94N~DRB1*08:04	0.000264222		A*29:66~B*42:01~DRB1*03:102	0.000108226
B*18:88~DRB1*08:04	0.000264222		A*29:66~B*42:01~DRB1*03:115	0.000108226
B*18:87~DRB1*08:04	0.000264222		A*29:32~B*42:01~DRB1*03:102	0.000108226
B*18:89~DRB1*08:04	0.000264222		A*29:66~B*42:01~DRB1*03:02	0.000108226
B*18:93~DRB1*08:04	0.000264222		A*74:18~B*41:35~DRB1*13:128	0.000108226
B*18:73~DRB1*08:04	0.000264222		A*29:32~B*42:01~DRB1*03:115	0.000108226
A*02:05g~B*58:49	0.000263689		A*74:18~B*41:29~DRB1*13:02	0.000108226
A*02:05g~B*58:63	0.000263689		A*74:18~B*41:34~DRB1*13:128	0.000108226
A*23:01g~B*08:138	0.000263091		A*74:18~B*41:32~DRB1*13:02	0.000108226
B*58:60~DRB1*03:02	0.000262798		A*74:18~B*41:32~DRB1*13:128	0.000108226
B*81:07~DRB1*11:157	0.000260798		A*74:18~B*41:34~DRB1*13:02	0.000108226
B*81:07~DRB1*11:158	0.000260798		A*74:18~B*41:01~DRB1*13:128	0.000108226
B*81:07~DRB1*11:155	0.000260798		A*74:18~B*41:29~DRB1*13:128	0.000108226
A*23:56~B*45:01g	0.00025898		A*74:18~B*41:35~DRB1*13:02	0.000108226
A*23:54~B*45:01g	0.00025898		A*74:18~B*41:01~DRB1*13:02	0.000108226
B*81:07~DRB1*11:100	0.000251903		A*29:44~B*42:01~DRB1*03:115	0.00010822
B*81:07~DRB1*11:97	0.000251903		A*29:65~B*42:01~DRB1*03:115	0.00010822
B*81:07~DRB1*11:117	0.000251903		A*29:64~B*42:01~DRB1*03:115	0.00010822
A*29:01~B*18:87	0.000251132		A*29:72~B*42:01~DRB1*03:115	0.00010822
A*29:01~B*18:88	0.000251132		A*29:72~B*42:01~DRB1*03:102	0.00010822
A*29:01~B*18:73	0.000251132		A*29:44~B*42:01~DRB1*03:102	0.00010822
A*29:01~B*18:92	0.000251132		A*29:65~B*42:01~DRB1*03:102	0.00010822
A*29:01~B*18:93	0.000251132		A*29:64~B*42:01~DRB1*03:102	0.00010822
A*29:01~B*18:89	0.000251132		A*29:64~B*42:01~DRB1*03:02	0.00010822
A*29:01~B*18:90	0.000251132		A*29:44~B*42:01~DRB1*03:02	0.00010822
A*29:01~B*18:94N	0.000251132		A*29:65~B*42:01~DRB1*03:02	0.00010822
A*23:67~B*08:01g	0.000246648		A*29:72~B*42:01~DRB1*03:02	0.00010822
B*53:01g~DRB1*11:01	0.000244455		A*34:02~B*44:03~DRB1*13:190	0.000101462
B*53:01g~DRB1*11:155	0.000244298		A*33:95~B*44:03~DRB1*12:02	0.000101462
B*53:01g~DRB1*11:157	0.000244298		A*33:93~B*44:03~DRB1*12:02	0.000101462
B*53:01g~DRB1*11:158	0.000244298		A*34:02~B*44:198N~DRB1*13:190	0.000101462
B*53:01g~DRB1*11:100	0.000244298		A*34:02~B*44:198N~DRB1*13:166	0.000101462
B*53:01g~DRB1*11:117	0.000244298		A*34:02~B*44:207~DRB1*13:01	0.000101462
B*53:01g~DRB1*11:97	0.000244298		A*34:02~B*44:198N~DRB1*13:01	0.000101462
B*53:01g~DRB1*11:169N	0.00024422		A*34:02~B*44:193~DRB1*13:190	0.000101462
A*68:31~B*07:02g	0.000243746		A*34:02~B*44:193~DRB1*13:01	0.000101462
B*44:03~DRB1*13:97	0.000242249		A*34:02~B*44:207~DRB1*13:166	0.000101462
B*44:03~DRB1*13:36	0.000242249		A*34:02~B*44:207~DRB1*13:190	0.000101462
B*44:03~DRB1*13:37	0.000242249		A*34:02~B*44:193~DRB1*13:166	0.000101462
B*44:03~DRB1*13:23	0.000242249		A*34:02~B*44:193~DRB1*13:117	0.000101462
B*44:03~DRB1*13:38	0.000242249		A*34:02~B*44:198N~DRB1*13:117	0.000101462
B*57:03~DRB1*13:120	0.000242249		A*34:02~B*44:207~DRB1*13:117	0.000101462
B*57:07~DRB1*13:66	0.000242249		A*34:02~B*44:207~DRB1*13:173	0.000101462
B*57:07~DRB1*13:139	0.000242249		A*34:02~B*44:198N~DRB1*13:173	0.000101462
B*57:07~DRB1*13:03	0.000242249		A*34:02~B*44:193~DRB1*13:173	0.000101462
B*57:03~DRB1*13:66	0.000242249		A*34:02~B*44:207~DRB1*13:112	0.000101462
B*57:07~DRB1*13:115	0.000242249		A*33:93~B*44:199~DRB1*12:02	0.000101462
B*44:37~DRB1*13:23	0.000242249		A*33:95~B*44:199~DRB1*12:02	0.000101462
B*57:07~DRB1*13:120	0.000242249		A*34:02~B*44:198N~DRB1*13:112	0.000101462
B*44:37~DRB1*13:37	0.000242249		A*34:02~B*44:193~DRB1*13:105	0.000101462
B*57:03~DRB1*13:139	0.000242249		A*34:02~B*44:193~DRB1*13:112	0.000101462
B*44:37~DRB1*13:36	0.000242249		A*34:02~B*44:207~DRB1*13:186	0.000101462
B*57:07~DRB1*13:170	0.000242249		A*34:02~B*44:198N~DRB1*13:186	0.000101462
B*44:37~DRB1*13:97	0.000242249		A*34:02~B*44:193~DRB1*13:186	0.000101462
B*57:03~DRB1*13:170	0.000242249		A*34:02~B*44:207~DRB1*13:105	0.000101462
B*44:37~DRB1*13:02	0.000242249		A*34:02~B*44:198N~DRB1*13:105	0.000101462
B*44:37~DRB1*13:38	0.000242249		A*68:125~B*58:60~DRB1*14:113	0.000101462
B*18:01g~DRB1*07:31	0.000242249		A*68:125~B*58:02~DRB1*14:142	0.000101462
B*18:01g~DRB1*07:33	0.000242249		A*29:44~B*53:01g~DRB1*03:02	0.000101462
B*18:01g~DRB1*07:34	0.000242249		A*68:125~B*58:02~DRB1*14:114	0.000101462
B*18:01g~DRB1*07:01	0.000242249		A*29:53~B*53:27~DRB1*03:02	0.000101462
B*81:01g~DRB1*11:154	0.000242249		A*68:125~B*58:60~DRB1*14:114	0.000101462
B*81:01g~DRB1*11:166	0.000242249		A*68:125~B*58:02~DRB1*14:125	0.000101462
B*45:01g~DRB1*13:148	0.000242249		A*68:125~B*58:60~DRB1*14:125	0.000101462
B*45:01g~DRB1*13:153	0.000242249		A*68:125~B*58:02~DRB1*14:01	0.000101462
B*45:01g~DRB1*13:147	0.000242249		A*68:125~B*58:60~DRB1*14:01	0.000101462
B*45:01g~DRB1*13:143	0.000242249		A*29:53~B*53:01g~DRB1*03:02	0.000101462
B*07:213~DRB1*04:151	0.000242249		A*68:125~B*58:02~DRB1*14:113	0.000101462
B*07:213~DRB1*04:01	0.000242249		A*68:125~B*58:60~DRB1*14:157	0.000101462
B*07:213~DRB1*04:171	0.000242249		A*29:43~B*53:01g~DRB1*03:102	0.000101462
B*07:213~DRB1*04:175	0.000242249		A*29:40~B*53:01g~DRB1*03:102	0.000101462
B*15:03g~DRB1*03:107	0.000242249		A*68:125~B*58:02~DRB1*14:54	0.000101462
B*15:03g~DRB1*03:108	0.000242249		A*68:125~B*58:60~DRB1*14:54	0.000101462
A*30:02g~DRB1*01:35	0.000242249		A*68:125~B*58:02~DRB1*14:157	0.000101462
A*30:02g~DRB1*01:34	0.000242249		A*68:125~B*58:60~DRB1*14:151	0.000101462
A*80:01~DRB1*03:01	0.000242249		A*68:125~B*58:02~DRB1*14:151	0.000101462
A*43:01~DRB1*13:121	0.000242249		A*68:125~B*58:60~DRB1*14:142	0.000101462
A*80:01~DRB1*03:83	0.000242249		A*68:02g~B*58:02~DRB1*14:114	0.000101462
A*43:01~DRB1*13:183	0.000242249		A*68:02g~B*58:02~DRB1*14:142	0.000101462
A*80:01~DRB1*03:68N	0.000242249		A*68:02g~B*58:60~DRB1*14:01	0.000101462
A*80:01~DRB1*03:50	0.000242249		A*68:02g~B*58:60~DRB1*14:114	0.000101462
A*80:01~DRB1*03:117	0.000242249		A*68:02g~B*58:02~DRB1*14:125	0.000101462
A*80:01~DRB1*03:116	0.000242249		A*68:02g~B*58:60~DRB1*14:125	0.000101462
A*80:01~DRB1*03:114	0.000242249		A*68:02g~B*58:60~DRB1*14:157	0.000101462
A*80:01~DRB1*03:108	0.000242249		A*68:02g~B*58:02~DRB1*14:54	0.000101462
A*80:01~DRB1*03:107	0.000242249		A*68:02g~B*58:02~DRB1*14:157	0.000101462
A*80:01~DRB1*03:104	0.000242249		A*29:53~B*53:01g~DRB1*03:102	0.000101462
A*80:01~DRB1*03:100	0.000242249		A*29:44~B*53:27~DRB1*03:02	0.000101462
A*66:01g~DRB1*13:109	0.000242249		A*29:43~B*53:27~DRB1*03:02	0.000101462
A*80:01~DRB1*03:112	0.000242249		A*29:45~B*53:01g~DRB1*03:102	0.000101462
A*30:82~DRB1*13:128	0.000242249		A*68:02g~B*58:02~DRB1*14:151	0.000101462
A*02:532~DRB1*04:05	0.000242249		A*68:02g~B*58:60~DRB1*14:54	0.000101462
A*02:546~DRB1*04:05	0.000242249		A*68:02g~B*58:02~DRB1*14:113	0.000101462
A*02:484~DRB1*04:05	0.000242249		A*68:02g~B*58:60~DRB1*14:142	0.000101462
A*02:484~DRB1*04:178N	0.000242249		A*68:02g~B*58:60~DRB1*14:113	0.000101462
A*23:04~DRB1*11:01	0.000242249		A*68:02g~B*58:60~DRB1*14:151	0.000101462
A*23:04~DRB1*11:27	0.000242249		A*29:40~B*53:27~DRB1*03:102	0.000101462
A*23:04~DRB1*11:100	0.000242249		A*68:02g~B*58:02~DRB1*14:01	0.000101462
A*23:04~DRB1*11:97	0.000242249		A*29:43~B*53:27~DRB1*03:102	0.000101462
A*02:532~DRB1*04:178N	0.000242249		A*29:45~B*53:27~DRB1*03:02	0.000101462
A*30:82~DRB1*03:102	0.000242249		A*29:45~B*53:01g~DRB1*03:02	0.000101462
A*30:82~DRB1*03:02	0.000242249		A*29:53~B*53:27~DRB1*03:102	0.000101462
A*02:546~DRB1*04:178N	0.000242249		A*29:40~B*53:27~DRB1*03:02	0.000101462
A*30:04g~DRB1*15:114	0.000242249		A*29:43~B*53:01g~DRB1*03:02	0.000101462
A*30:04g~DRB1*15:01	0.000242249		A*29:44~B*53:27~DRB1*03:102	0.000101462
A*30:04g~DRB1*15:74	0.000242249		A*29:44~B*53:01g~DRB1*03:102	0.000101462
A*30:04g~DRB1*15:85	0.000242249		A*29:45~B*53:27~DRB1*03:102	0.000101462
A*30:04g~DRB1*15:86	0.000242249		A*29:40~B*53:01g~DRB1*03:02	0.000101462
A*30:04g~DRB1*15:106	0.000242249		A*68:01g~B*08:01g~DRB1*03:83	0.000101405
A*30:04g~DRB1*15:107	0.000242249		A*68:01g~B*08:01g~DRB1*03:50	0.000101405
A*30:04g~DRB1*15:108	0.000242249		A*68:01g~B*08:01g~DRB1*03:112	0.000101405
A*30:04g~DRB1*15:110	0.000242249		A*68:01g~B*08:01g~DRB1*03:107	0.000101405
A*30:04g~DRB1*15:111	0.000242249		A*68:01g~B*08:01g~DRB1*03:104	0.000101405
A*30:04g~DRB1*15:112	0.000242249		A*68:01g~B*08:01g~DRB1*03:68N	0.000101405
A*30:04g~DRB1*15:113N	0.000242249		A*68:01g~B*08:01g~DRB1*03:100	0.000101405
A*23:01g~DRB1*13:112	0.000242249		A*68:119~B*08:01g~DRB1*03:01	0.000101343
A*23:01g~DRB1*13:153	0.000242249		A*68:119~B*08:01g~DRB1*03:68N	0.000101343
A*23:01g~DRB1*13:109	0.000242249		A*68:119~B*08:01g~DRB1*03:50	0.000101343
A*23:01g~DRB1*13:105	0.000242249		A*68:119~B*08:01g~DRB1*03:83	0.000101343
A*23:01g~DRB1*13:148	0.000242249		A*68:119~B*08:01g~DRB1*03:112	0.000101343
A*23:01g~DRB1*13:143	0.000242249		A*68:119~B*08:01g~DRB1*03:107	0.000101343
A*23:01g~DRB1*13:147	0.000242249		A*68:119~B*08:01g~DRB1*03:104	0.000101343
A*30:02g~DRB1*03:108	0.000242249		A*68:119~B*08:01g~DRB1*03:100	0.000101343
A*30:02g~DRB1*03:117	0.000242249		A*29:72~B*44:03~DRB1*11:169N	0.000100847
A*30:02g~DRB1*03:114	0.000242249		A*29:44~B*44:03~DRB1*11:100	0.000100847
A*30:02g~DRB1*03:116	0.000242249		A*29:72~B*44:03~DRB1*11:117	0.000100847
A*29:34~DRB1*13:115	0.000242248		A*29:44~B*44:03~DRB1*11:01	0.000100847
A*29:34~DRB1*13:120	0.000242248		A*29:72~B*44:03~DRB1*11:01	0.000100847
A*29:34~DRB1*13:139	0.000242248		A*29:65~B*44:03~DRB1*11:01	0.000100847
A*29:34~DRB1*13:170	0.000242248		A*29:72~B*44:03~DRB1*11:100	0.000100847
A*29:34~DRB1*13:66	0.000242248		A*29:72~B*44:03~DRB1*11:97	0.000100847
A*29:02g~DRB1*13:115	0.000242192		A*29:64~B*44:03~DRB1*11:155	0.000100847
A*29:02g~DRB1*13:120	0.000242192		A*29:44~B*44:03~DRB1*11:117	0.000100847
A*29:02g~DRB1*13:139	0.000242191		A*29:65~B*44:03~DRB1*11:97	0.000100847
A*29:02g~DRB1*13:170	0.000242191		A*29:64~B*44:03~DRB1*11:169N	0.000100847
A*29:02g~DRB1*13:66	0.000242191		A*29:72~B*44:03~DRB1*11:158	0.000100847
A*23:01g~B*15:90	0.000238142		A*29:44~B*44:03~DRB1*11:158	0.000100847
A*30:82~DRB1*13:02	0.000236734		A*29:65~B*44:03~DRB1*11:157	0.000100847
A*29:34~DRB1*13:03	0.000232773		A*29:64~B*44:03~DRB1*11:157	0.000100847
A*30:01g~DRB1*12:36	0.000232559		A*29:72~B*44:03~DRB1*11:155	0.000100847
A*33:57~B*15:16	0.000230204		A*29:64~B*44:03~DRB1*11:01	0.000100847
A*26:104~B*15:03g	0.000230204		A*29:65~B*44:03~DRB1*11:158	0.000100847
A*33:60~B*15:16	0.000230204		A*29:44~B*44:03~DRB1*11:155	0.000100847
A*33:70~B*15:16	0.000230204		A*29:65~B*44:03~DRB1*11:155	0.000100847
A*26:109~B*15:03g	0.000230204		A*29:65~B*44:03~DRB1*11:100	0.000100847
A*23:03~B*07:80	0.000230204		A*29:64~B*44:03~DRB1*11:97	0.000100847
A*33:71~B*15:16	0.000230204		A*29:64~B*44:03~DRB1*11:117	0.000100847
A*33:56~B*15:16	0.000230204		A*29:44~B*44:03~DRB1*11:97	0.000100847
A*33:60~B*15:10	0.000230204		A*29:64~B*44:03~DRB1*11:100	0.000100847
A*33:56~B*15:10	0.000230204		A*29:44~B*44:03~DRB1*11:157	0.000100847
A*33:57~B*15:10	0.000230204		A*29:72~B*44:03~DRB1*11:157	0.000100847
A*23:01g~B*08:140	0.000230204		A*29:44~B*44:03~DRB1*11:169N	0.000100847
A*33:70~B*15:10	0.000230204		A*29:64~B*44:03~DRB1*11:158	0.000100847
A*33:71~B*15:10	0.000230204		A*29:65~B*44:03~DRB1*11:169N	0.000100847
[truncated: 5,500 more rows]
